# Supplementary material for: Qi Fu Yin ameliorates neuroinflammation through inhibiting RAGE and TLR4/NF-κB pathway in AD model rats
Source: publisher site journal article supplement (doi:10.18632/aging.205238), 2023-11-22
Supplement: Supplementary file [file aging-v15i22-205238-supplementary-material-SD1.pdf]

## SUPPLEMENTARY FIGURE

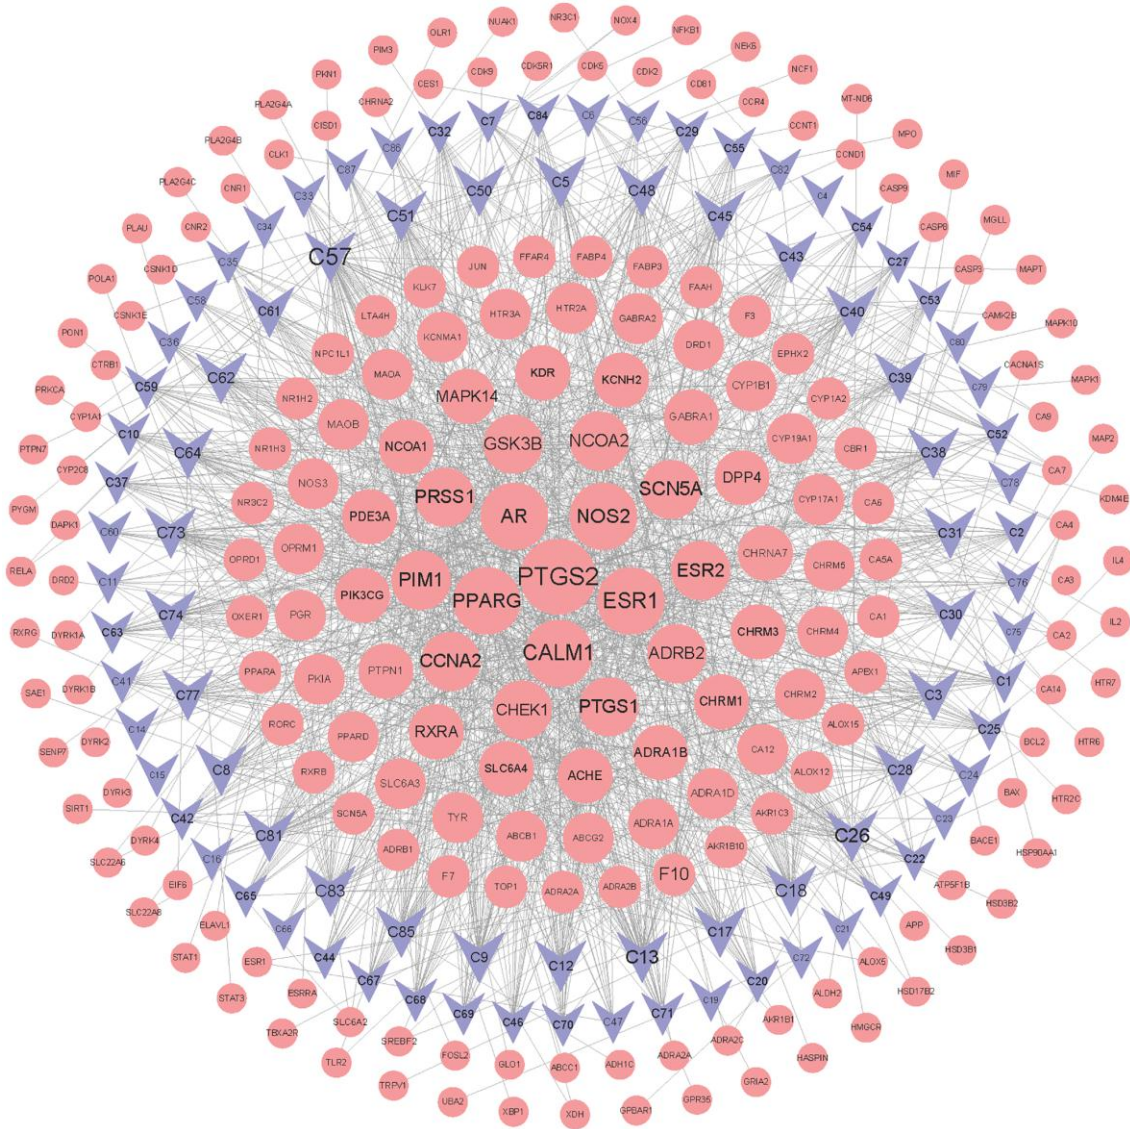

**Supplementary Figure 1. C-T network based on the interactions between 87 compounds and 203 targets in QFY.** The purple nodes represent compounds, the pink nodes represent targets, and the lines between the nodes represent the interactions between compounds and targets.
