# Supplementary material for: Qi Fu Yin ameliorates neuroinflammation through inhibiting RAGE and TLR4/NF-κB pathway in AD model rats
Source: Aging (Albany NY). 2023 Nov 22;15(22):13239–64. doi: 10.18632/aging.205238 (PMC10713403; doi:10.18632/aging.205238)
Supplement: Supplementary Table 1 [file aging-15-205238-s002.xlsx]

## Sheet: Sheet1
Supplementary Table 1. Information on compound-target interactions.
No.	Molecule Name	Target	Gene
C1	(2R)-7-hydroxy-2-(4-hydroxyphenyl)chroman-11-one	Phosphatidylinositol-4,5-bisphosphate 3-kinase catalytic subunit, gamma isoform	PIK3CG
C1	(2R)-7-hydroxy-2-(4-hydroxyphenyl)chroman-13-one	Amine oxidase [flavin-containing] B	MAOB
C1	(2R)-7-hydroxy-2-(4-hydroxyphenyl)chroman-15-one	cAMP-dependent protein kinase inhibitor alpha	PKIA
C1	(2R)-7-hydroxy-2-(4-hydroxyphenyl)chroman-16-one	Calmodulin-1	CALM1
C1	(2R)-7-hydroxy-2-(4-hydroxyphenyl)chroman-17-one	Gamma-aminobutyric acid receptor subunit alpha-1	GABRA1
C1	(2R)-7-hydroxy-2-(4-hydroxyphenyl)chroman-18-one	Sodium-dependent serotonin transporter	SLC6A4
C1	(2R)-7-hydroxy-2-(4-hydroxyphenyl)chroman-4-one	Amine oxidase [flavin-containing] B	MAOB
C1	(2R)-7-hydroxy-2-(4-hydroxyphenyl)chroman-4-one	Aromatase	CYP19A1
C1	(2R)-7-hydroxy-2-(4-hydroxyphenyl)chroman-4-one	Carbonic anhydrase 4	CA4
C1	(2R)-7-hydroxy-2-(4-hydroxyphenyl)chroman-4-one	Carbonyl reductase [NADPH] 1	CBR1
C1	(2R)-7-hydroxy-2-(4-hydroxyphenyl)chroman-4-one	Cytochrome P450 1B1	CYP1B1
C1	(2R)-7-hydroxy-2-(4-hydroxyphenyl)chroman-4-one	Prostaglandin G/H synthase 1	PTGS1
C1	(2R)-7-hydroxy-2-(4-hydroxyphenyl)chroman-5-one	Estrogen receptor	ESR1
C1	(2R)-7-hydroxy-2-(4-hydroxyphenyl)chroman-6-one	Prostaglandin G/H synthase 2	PTGS2
C1	(2R)-7-hydroxy-2-(4-hydroxyphenyl)chroman-7-one	Retinoic acid receptor RXR-alpha	RXRA
C1	(2R)-7-hydroxy-2-(4-hydroxyphenyl)chroman-8-one	CGMP-inhibited 3',5'-cyclic phosphodiesterase A	PDE3A
C1	(2R)-7-hydroxy-2-(4-hydroxyphenyl)chroman-9-one	Beta-2 adrenergic receptor	ADRB2
C2	(2S)-7-hydroxy-2-(4-hydroxyphenyl)-8-(3-methylbut-2-enyl)chroman-10-one	CGMP-inhibited 3',5'-cyclic phosphodiesterase A	PDE3A
C2	(2S)-7-hydroxy-2-(4-hydroxyphenyl)-8-(3-methylbut-2-enyl)chroman-11-one	Alpha-1B adrenergic receptor	ADRA1B
C2	(2S)-7-hydroxy-2-(4-hydroxyphenyl)-8-(3-methylbut-2-enyl)chroman-12-one	Beta-2 adrenergic receptor	ADRB2
C2	(2S)-7-hydroxy-2-(4-hydroxyphenyl)-8-(3-methylbut-2-enyl)chroman-13-one	Estrogen receptor beta	ESR2
C2	(2S)-7-hydroxy-2-(4-hydroxyphenyl)-8-(3-methylbut-2-enyl)chroman-15-one	Calmodulin-1	CALM1
C2	(2S)-7-hydroxy-2-(4-hydroxyphenyl)-8-(3-methylbut-2-enyl)chroman-4-one	Aromatase	CYP19A1
C2	(2S)-7-hydroxy-2-(4-hydroxyphenyl)-8-(3-methylbut-2-enyl)chroman-4-one	ATP-binding cassette sub-family G member 2	ABCG2
C2	(2S)-7-hydroxy-2-(4-hydroxyphenyl)-8-(3-methylbut-2-enyl)chroman-4-one	Estrogen receptor	ESR1
C2	(2S)-7-hydroxy-2-(4-hydroxyphenyl)-8-(3-methylbut-2-enyl)chroman-4-one	Estrogen receptor beta	ESR2
C2	(2S)-7-hydroxy-2-(4-hydroxyphenyl)-8-(3-methylbut-2-enyl)chroman-4-one	Nitric oxide synthase, inducible	NOS2
C2	(2S)-7-hydroxy-2-(4-hydroxyphenyl)-8-(3-methylbut-2-enyl)chroman-4-one	Tyrosine-protein phosphatase non-receptor type 1	PTPN1
C2	(2S)-7-hydroxy-2-(4-hydroxyphenyl)-8-(3-methylbut-2-enyl)chroman-5-one	Prostaglandin G/H synthase 1	PTGS1
C2	(2S)-7-hydroxy-2-(4-hydroxyphenyl)-8-(3-methylbut-2-enyl)chroman-6-one	Estrogen receptor	ESR1
C2	(2S)-7-hydroxy-2-(4-hydroxyphenyl)-8-(3-methylbut-2-enyl)chroman-7-one	Sodium channel protein type 5 subunit alpha	SCN5A
C2	(2S)-7-hydroxy-2-(4-hydroxyphenyl)-8-(3-methylbut-2-enyl)chroman-8-one	Coagulation factor Xa	F10
C2	(2S)-7-hydroxy-2-(4-hydroxyphenyl)-8-(3-methylbut-2-enyl)chroman-9-one	Prostaglandin G/H synthase 2	PTGS2
C3	(S)-Coclaurine	Alpha-1A adrenergic receptor	ADRA1A
C3	(S)-Coclaurine	Alpha-1B adrenergic receptor	ADRA1B
C3	(S)-Coclaurine	Alpha-1D adrenergic receptor	ADRA1D
C3	(S)-Coclaurine	Alpha-2A adrenergic receptor	ADRA2A
C3	(S)-Coclaurine	Alpha-2C adrenergic receptor	ADRA2C
C3	(S)-Coclaurine	Amine oxidase [flavin-containing] B	MAOB
C3	(S)-Coclaurine	Beta-1 adrenergic receptor	ADRB1
C3	(S)-Coclaurine	Beta-2 adrenergic receptor	ADRB2
C3	(S)-Coclaurine	Calmodulin-1	CALM1
C3	(S)-Coclaurine	Carbonic anhydrase II	CA2
C3	(S)-Coclaurine	CGMP-inhibited 3',5'-cyclic phosphodiesterase A	PDE3A
C3	(S)-Coclaurine	D(2) dopamine receptor	DRD2
C3	(S)-Coclaurine	Dopamine D1 receptor	DRD1
C3	(S)-Coclaurine	Muscarinic acetylcholine receptor M1	CHRM1
C3	(S)-Coclaurine	Muscarinic acetylcholine receptor M3	CHRM3
C3	(S)-Coclaurine	Mu-type opioid receptor	OPRM1
C3	(S)-Coclaurine	Nuclear receptor coactivator 2	NCOA2
C3	(S)-Coclaurine	Prostaglandin G/H synthase 1	PTGS1
C3	(S)-Coclaurine	Prostaglandin G/H synthase 2	PTGS2
C3	(S)-Coclaurine	Retinoic acid receptor RXR-alpha	RXRA
C3	(S)-Coclaurine	Sodium channel protein type 5 subunit alpha	SCN5A
C3	(S)-Coclaurine	Sodium-dependent dopamine transporter	SLC6A3
C3	(S)-Coclaurine	Sodium-dependent serotonin transporter	SLC6A4
C3	(S)-Coclaurine	Thromboxane A2 receptor	TBXA2R
C4	1,7-Dimethoxyxanthone	Amine oxidase [flavin-containing] A	MAOA
C4	1,7-Dimethoxyxanthone	Sentrin-specific protease 7	SENP7
C5	1-Methoxyphaseollidin	Prostaglandin G/H synthase 2	PTGS2
C5	1-Methoxyphaseollidin	Nitric-oxide synthase, endothelial	NOS3
C5	1-Methoxyphaseollidin	Vascular endothelial growth factor receptor 2	KDR
C5	1-Methoxyphaseollidin	Retinoic acid receptor RXR-alpha	RXRA
C5	1-Methoxyphaseollidin	Alpha-1B adrenergic receptor	ADRA1B
C5	1-Methoxyphaseollidin	Beta-2 adrenergic receptor	ADRB2
C5	1-Methoxyphaseollidin	Alpha-1D adrenergic receptor	ADRA1D
C5	1-Methoxyphaseollidin	Estrogen receptor beta	ESR2
C5	1-Methoxyphaseollidin	Mitogen-activated protein kinase 14	MAPK14
C5	1-Methoxyphaseollidin	Nitric oxide synthase, inducible	NOS2
C5	1-Methoxyphaseollidin	Glycogen synthase kinase-3 beta	GSK3B
C5	1-Methoxyphaseollidin	Phosphatidylinositol-4,5-bisphosphate 3-kinase catalytic subunit, gamma isoform	PIK3CG
C5	1-Methoxyphaseollidin	Trypsin-1	PRSS1
C5	1-Methoxyphaseollidin	Proto-oncogene serine/threonine-protein kinase Pim-1	PIM1
C5	1-Methoxyphaseollidin	Cyclin-A2	CCNA2
C5	1-Methoxyphaseollidin	Nuclear receptor coactivator 2	NCOA2
C5	1-Methoxyphaseollidin	Nuclear receptor coactivator 1	NCOA1
C5	1-Methoxyphaseollidin	Calmodulin-1	CALM1
C5	1-Methoxyphaseollidin	Prostaglandin G/H synthase 1	PTGS1
C5	1-Methoxyphaseollidin	Potassium voltage-gated channel subfamily H member 2	KCNH2
C5	1-Methoxyphaseollidin	Estrogen receptor	ESR1
C5	1-Methoxyphaseollidin	Androgen receptor	AR
C5	1-Methoxyphaseollidin	Sodium channel protein type 5 subunit alpha	SCN5A
C5	1-Methoxyphaseollidin	Peroxisome proliferator activated receptor gamma	PPARG
C5	1-Methoxyphaseollidin	Coagulation factor Xa	F10
C6	3，4 5-trimethoxycinnamic acid	Carbonic anhydrase 1	CA1
C6	3，4 5-trimethoxycinnamic acid	Carbonic anhydrase 12	CA12
C6	3，4 5-trimethoxycinnamic acid	Carbonic anhydrase 14	CA14
C6	3，4 5-trimethoxycinnamic acid	Carbonic anhydrase 5A, mitochondrial	CA5A
C6	3，4 5-trimethoxycinnamic acid	Carbonic anhydrase 6	CA6
C6	3，4 5-trimethoxycinnamic acid	Carbonic anhydrase 7	CA7
C6	3，4 5-trimethoxycinnamic acid	Carbonic anhydrase 9	CA9
C6	3，4 5-trimethoxycinnamic acid	Multidrug resistance protein 1	ABCB1
C7	3,4-Dimethoxycinnamic acid	Aldo-keto reductase family 1 member C3	AKR1C3
C7	3,4-Dimethoxycinnamic acid	ATP-binding cassette sub-family G member 2	ABCG2
C7	3,4-Dimethoxycinnamic acid	Carbonic anhydrase 1	CA1
C7	3,4-Dimethoxycinnamic acid	Carbonic anhydrase 12	CA12
C7	3,4-Dimethoxycinnamic acid	Carbonic anhydrase 14	CA14
C7	3,4-Dimethoxycinnamic acid	Carbonic anhydrase 2	CA2
C7	3,4-Dimethoxycinnamic acid	Carbonic anhydrase 5A, mitochondrial	CA5A
C7	3,4-Dimethoxycinnamic acid	Carbonic anhydrase 6	CA6
C7	3,4-Dimethoxycinnamic acid	Carbonic anhydrase 7	CA7
C7	3,4-Dimethoxycinnamic acid	Carbonic anhydrase 9	CA9
C7	3,4-Dimethoxycinnamic acid	Cytochrome P450 1A1	CYP1A1
C7	3,4-Dimethoxycinnamic acid	Cytochrome P450 1A2	CYP1A2
C7	3,4-Dimethoxycinnamic acid	Cytochrome P450 1B1	CYP1B1
C7	3,4-Dimethoxycinnamic acid	Nuclear factor NF-kappa-B p105 subunit	NFKB1
C7	3,4-Dimethoxycinnamic acid	Signal transducer and activator of transcription 1-alpha/beta	STAT1
C7	3,4-Dimethoxycinnamic acid	Transcription factor AP-1	JUN
C8	3'-Hydroxy-4'-O-Methylglabridin	Peroxisome proliferator activated receptor gamma	PPARG
C8	3'-Hydroxy-4'-O-Methylglabridin	Coagulation factor Xa	F10
C8	3'-Hydroxy-4'-O-Methylglabridin	Prostaglandin G/H synthase 2	PTGS2
C8	3'-Hydroxy-4'-O-Methylglabridin	Coagulation factor VII	F7
C8	3'-Hydroxy-4'-O-Methylglabridin	Vascular endothelial growth factor receptor 2	KDR
C8	3'-Hydroxy-4'-O-Methylglabridin	Alpha-1B adrenergic receptor	ADRA1B
C8	3'-Hydroxy-4'-O-Methylglabridin	Beta-2 adrenergic receptor	ADRB2
C8	3'-Hydroxy-4'-O-Methylglabridin	Estrogen receptor beta	ESR2
C8	3'-Hydroxy-4'-O-Methylglabridin	Mitogen-activated protein kinase 14	MAPK14
C8	3'-Hydroxy-4'-O-Methylglabridin	Glycogen synthase kinase-3 beta	GSK3B
C8	3'-Hydroxy-4'-O-Methylglabridin	Serine/threonine-protein kinase Chk1	CHEK1
C8	3'-Hydroxy-4'-O-Methylglabridin	Trypsin-1	PRSS1
C8	3'-Hydroxy-4'-O-Methylglabridin	Proto-oncogene serine/threonine-protein kinase Pim-1	PIM1
C8	3'-Hydroxy-4'-O-Methylglabridin	Cyclin-A2	CCNA2
C8	3'-Hydroxy-4'-O-Methylglabridin	Nuclear receptor coactivator 2	NCOA2
C8	3'-Hydroxy-4'-O-Methylglabridin	Nuclear receptor coactivator 1	NCOA1
C8	3'-Hydroxy-4'-O-Methylglabridin	Calcium-activated potassium channel subunit alpha 1	KCNMA1
C8	3'-Hydroxy-4'-O-Methylglabridin	Calmodulin-1	CALM1
C8	3'-Hydroxy-4'-O-Methylglabridin	Nitric oxide synthase, inducible	NOS2
C8	3'-Hydroxy-4'-O-Methylglabridin	Tyrosinase	TYR
C8	3'-Hydroxy-4'-O-Methylglabridin	Prostaglandin G/H synthase 1	PTGS1
C8	3'-Hydroxy-4'-O-Methylglabridin	Potassium voltage-gated channel subfamily H member 2	KCNH2
C8	3'-Hydroxy-4'-O-Methylglabridin	Estrogen receptor	ESR1
C8	3'-Hydroxy-4'-O-Methylglabridin	Androgen receptor	AR
C8	3'-Hydroxy-4'-O-Methylglabridin	Sodium channel protein type 5 subunit alpha	SCN5A
C9	3'-Methoxyglabridin	Calmodulin-1	CALM1
C9	3'-Methoxyglabridin	Coagulation factor Xa	F10
C9	3'-Methoxyglabridin	Prostaglandin G/H synthase 2	PTGS2
C9	3'-Methoxyglabridin	Coagulation factor VII	F7
C9	3'-Methoxyglabridin	Retinoic acid receptor RXR-alpha	RXRA
C9	3'-Methoxyglabridin	Acetylcholinesterase	ACHE
C9	3'-Methoxyglabridin	Alpha-1B adrenergic receptor	ADRA1B
C9	3'-Methoxyglabridin	Beta-2 adrenergic receptor	ADRB2
C9	3'-Methoxyglabridin	Estrogen receptor beta	ESR2
C9	3'-Methoxyglabridin	Mitogen-activated protein kinase 14	MAPK14
C9	3'-Methoxyglabridin	Glycogen synthase kinase-3 beta	GSK3B
C9	3'-Methoxyglabridin	Serine/threonine-protein kinase Chk1	CHEK1
C9	3'-Methoxyglabridin	Trypsin-1	PRSS1
C9	3'-Methoxyglabridin	Proto-oncogene serine/threonine-protein kinase Pim-1	PIM1
C9	3'-Methoxyglabridin	Cyclin-A2	CCNA2
C9	3'-Methoxyglabridin	Nuclear receptor coactivator 2	NCOA2
C9	3'-Methoxyglabridin	Nuclear receptor coactivator 1	NCOA1
C9	3'-Methoxyglabridin	Calcium-activated potassium channel subunit alpha 1	KCNMA1
C9	3'-Methoxyglabridin	Nitric oxide synthase, inducible	NOS2
C9	3'-Methoxyglabridin	Tyrosinase	TYR
C9	3'-Methoxyglabridin	Prostaglandin G/H synthase 1	PTGS1
C9	3'-Methoxyglabridin	Potassium voltage-gated channel subfamily H member 2	KCNH2
C9	3'-Methoxyglabridin	Estrogen receptor	ESR1
C9	3'-Methoxyglabridin	Androgen receptor	AR
C9	3'-Methoxyglabridin	Sodium channel protein type 5 subunit alpha	SCN5A
C9	3'-Methoxyglabridin	Peroxisome proliferator activated receptor gamma	PPARG
C10	3β-acetoxyatractylone	Retinoic acid receptor RXR-alpha	RXRA
C10	3β-acetoxyatractylone	Acetylcholinesterase	ACHE
C10	3β-acetoxyatractylone	Alpha-1A adrenergic receptor	ADRA1A
C10	3β-acetoxyatractylone	Muscarinic acetylcholine receptor M2	CHRM2
C10	3β-acetoxyatractylone	Beta-2 adrenergic receptor	ADRB2
C10	3β-acetoxyatractylone	Mu-type opioid receptor	OPRM1
C10	3β-acetoxyatractylone	Gamma-aminobutyric acid receptor subunit alpha-1	GABRA1
C10	3β-acetoxyatractylone	Dipeptidyl peptidase IV	DPP4
C10	3β-acetoxyatractylone	Neuronal acetylcholine receptor protein, alpha-7 chain	CHRNA7
C10	3β-acetoxyatractylone	Androgen receptor	AR
C10	3β-acetoxyatractylone	Muscarinic acetylcholine receptor M1	CHRM1
C10	3β-acetoxyatractylone	Muscarinic acetylcholine receptor M3	CHRM3
C10	3β-acetoxyatractylone	Nitric-oxide synthase, endothelial	NOS3
C10	3β-acetoxyatractylone	Prostaglandin G/H synthase 2	PTGS2
C10	3β-acetoxyatractylone	Sodium channel protein type 5 subunit alpha	SCN5A
C11	6-prenylated eriodictyol	Coagulation factor Xa	F10
C11	6-prenylated eriodictyol	Prostaglandin G/H synthase 2	PTGS2
C11	6-prenylated eriodictyol	Coagulation factor VII	F7
C11	6-prenylated eriodictyol	Calmodulin-1	CALM1
C11	6-prenylated eriodictyol	Nuclear receptor coactivator 1	NCOA1
C11	6-prenylated eriodictyol	Nitric oxide synthase, inducible	NOS2
C11	6-prenylated eriodictyol	Estrogen receptor	ESR1
C11	6-prenylated eriodictyol	Sodium channel protein type 5 subunit alpha	SCN5A
C12	7-Acetoxy-2-methylisoflavone	Nitric-oxide synthase, endothelial	NOS3
C12	7-Acetoxy-2-methylisoflavone	Retinoic acid receptor RXR-alpha	RXRA
C12	7-Acetoxy-2-methylisoflavone	Acetylcholinesterase	ACHE
C12	7-Acetoxy-2-methylisoflavone	CGMP-inhibited 3',5'-cyclic phosphodiesterase A	PDE3A
C12	7-Acetoxy-2-methylisoflavone	Alpha-1B adrenergic receptor	ADRA1B
C12	7-Acetoxy-2-methylisoflavone	Beta-2 adrenergic receptor	ADRB2
C12	7-Acetoxy-2-methylisoflavone	Alpha-1D adrenergic receptor	ADRA1D
C12	7-Acetoxy-2-methylisoflavone	Gamma-aminobutyric acid receptor subunit alpha-1	GABRA1
C12	7-Acetoxy-2-methylisoflavone	Dipeptidyl peptidase IV	DPP4
C12	7-Acetoxy-2-methylisoflavone	Mitogen-activated protein kinase 14	MAPK14
C12	7-Acetoxy-2-methylisoflavone	Glycogen synthase kinase-3 beta	GSK3B
C12	7-Acetoxy-2-methylisoflavone	Serine/threonine-protein kinase Chk1	CHEK1
C12	7-Acetoxy-2-methylisoflavone	Trypsin-1	PRSS1
C12	7-Acetoxy-2-methylisoflavone	Nuclear receptor coactivator 2	NCOA2
C12	7-Acetoxy-2-methylisoflavone	Calmodulin-1	CALM1
C12	7-Acetoxy-2-methylisoflavone	Nitric oxide synthase, inducible	NOS2
C12	7-Acetoxy-2-methylisoflavone	Prostaglandin G/H synthase 1	PTGS1
C12	7-Acetoxy-2-methylisoflavone	Estrogen receptor	ESR1
C12	7-Acetoxy-2-methylisoflavone	Androgen receptor	AR
C12	7-Acetoxy-2-methylisoflavone	Sodium channel protein type 5 subunit alpha	SCN5A
C12	7-Acetoxy-2-methylisoflavone	Peroxisome proliferator activated receptor gamma	PPARG
C12	7-Acetoxy-2-methylisoflavone	Prostaglandin G/H synthase 2	PTGS2
C13	7-Methoxy-2-methyl isoflavone	Beta-1 adrenergic receptor	ADRB1
C13	7-Methoxy-2-methyl isoflavone	Sodium channel protein type 5 subunit alpha	SCN5A
C13	7-Methoxy-2-methyl isoflavone	Peroxisome proliferator activated receptor gamma	PPARG
C13	7-Methoxy-2-methyl isoflavone	Prostaglandin G/H synthase 2	PTGS2
C13	7-Methoxy-2-methyl isoflavone	Retinoic acid receptor RXR-alpha	RXRA
C13	7-Methoxy-2-methyl isoflavone	Acetylcholinesterase	ACHE
C13	7-Methoxy-2-methyl isoflavone	CGMP-inhibited 3',5'-cyclic phosphodiesterase A	PDE3A
C13	7-Methoxy-2-methyl isoflavone	Alpha-1B adrenergic receptor	ADRA1B
C13	7-Methoxy-2-methyl isoflavone	Sodium-dependent dopamine transporter	SLC6A3
C13	7-Methoxy-2-methyl isoflavone	Beta-2 adrenergic receptor	ADRB2
C13	7-Methoxy-2-methyl isoflavone	Alpha-1D adrenergic receptor	ADRA1D
C13	7-Methoxy-2-methyl isoflavone	Sodium-dependent serotonin transporter	SLC6A4
C13	7-Methoxy-2-methyl isoflavone	Estrogen receptor beta	ESR2
C13	7-Methoxy-2-methyl isoflavone	Gamma-aminobutyric acid receptor subunit alpha-1	GABRA1
C13	7-Methoxy-2-methyl isoflavone	Dipeptidyl peptidase IV	DPP4
C13	7-Methoxy-2-methyl isoflavone	Mitogen-activated protein kinase 14	MAPK14
C13	7-Methoxy-2-methyl isoflavone	Glycogen synthase kinase-3 beta	GSK3B
C13	7-Methoxy-2-methyl isoflavone	Leukotriene A-4 hydrolase	LTA4H
C13	7-Methoxy-2-methyl isoflavone	Amine oxidase [flavin-containing] A	MAOA
C13	7-Methoxy-2-methyl isoflavone	Aromatase	CYP19A1
C13	7-Methoxy-2-methyl isoflavone	Carbonic anhydrase 1	CA1
C13	7-Methoxy-2-methyl isoflavone	Cytochrome P450 1A2	CYP1A2
C13	7-Methoxy-2-methyl isoflavone	Nitric oxide synthase, inducible	NOS2
C13	7-Methoxy-2-methyl isoflavone	Amine oxidase [flavin-containing] B	MAOB
C13	7-Methoxy-2-methyl isoflavone	Neuronal acetylcholine receptor protein, alpha-7 chain	CHRNA7
C13	7-Methoxy-2-methyl isoflavone	Serine/threonine-protein kinase Chk1	CHEK1
C13	7-Methoxy-2-methyl isoflavone	Trypsin-1	PRSS1
C13	7-Methoxy-2-methyl isoflavone	Proto-oncogene serine/threonine-protein kinase Pim-1	PIM1
C13	7-Methoxy-2-methyl isoflavone	Cyclin-A2	CCNA2
C13	7-Methoxy-2-methyl isoflavone	Nuclear receptor coactivator 1	NCOA1
C13	7-Methoxy-2-methyl isoflavone	cAMP-dependent protein kinase inhibitor alpha	PKIA
C13	7-Methoxy-2-methyl isoflavone	Prostaglandin G/H synthase 1	PTGS1
C13	7-Methoxy-2-methyl isoflavone	Calmodulin-1	CALM1
C13	7-Methoxy-2-methyl isoflavone	Muscarinic acetylcholine receptor M5	CHRM5
C13	7-Methoxy-2-methyl isoflavone	Nitric-oxide synthase, endothelial	NOS3
C13	7-Methoxy-2-methyl isoflavone	Mu-type opioid receptor	OPRM1
C13	7-Methoxy-2-methyl isoflavone	Nuclear receptor coactivator 2	NCOA2
C13	7-Methoxy-2-methyl isoflavone	Dopamine D1 receptor	DRD1
C13	7-Methoxy-2-methyl isoflavone	Muscarinic acetylcholine receptor M3	CHRM3
C13	7-Methoxy-2-methyl isoflavone	Muscarinic acetylcholine receptor M1	CHRM1
C13	7-Methoxy-2-methyl isoflavone	Estrogen receptor	ESR1
C13	7-Methoxy-2-methyl isoflavone	Androgen receptor	AR
C14	8β-ethoxy atractylenolide Ⅲ	Gamma-aminobutyric acid receptor subunit alpha-1	GABRA1
C14	8β-ethoxy atractylenolide Ⅲ	Neuronal acetylcholine receptor protein, alpha-7 chain	CHRNA7
C14	8β-ethoxy atractylenolide Ⅲ	Nuclear receptor coactivator 1	NCOA1
C14	8β-ethoxy atractylenolide Ⅲ	Nuclear receptor coactivator 2	NCOA2
C14	8β-ethoxy atractylenolide Ⅲ	Prostaglandin G/H synthase 2	PTGS2
C15	alexandrin_qt	Progesterone receptor	PGR
C16	Aposiopolamine	Beta-2 adrenergic receptor	ADRB2
C16	Aposiopolamine	Dipeptidyl peptidase IV	DPP4
C16	Aposiopolamine	Gamma-aminobutyric acid receptor subunit alpha-1	GABRA1
C16	Aposiopolamine	Muscarinic acetylcholine receptor M1	CHRM1
C16	Aposiopolamine	Muscarinic acetylcholine receptor M3	CHRM3
C16	Aposiopolamine	Sodium-dependent dopamine transporter	SLC6A3
C16	Aposiopolamine	Sodium-dependent noradrenaline transporter	SLC6A2
C16	Aposiopolamine	Sodium-dependent serotonin transporter	SLC6A4
C17	arachidonate	Arachidonate 12-lipoxygenase, 12S-type	ALOX12
C17	arachidonate	Arachidonate 5-lipoxygenase	ALOX5
C17	arachidonate	Bifunctional epoxide hydrolase 2	EPHX2
C17	arachidonate	Cannabinoid receptor 1	CNR1
C17	arachidonate	Cannabinoid receptor 2	CNR2
C17	arachidonate	Cytosolic phospholipase A2	PLA2G4A
C17	arachidonate	Cytosolic phospholipase A2 beta	PLA2G4B
C17	arachidonate	Cytosolic phospholipase A2 gamma	PLA2G4C
C17	arachidonate	DNA topoisomerase 1	TOP1
C17	arachidonate	Fatty acid-binding protein, adipocyte	FABP4
C17	arachidonate	Fatty acid-binding protein, heart	FABP3
C17	arachidonate	Fatty-acid amide hydrolase 1	FAAH
C17	arachidonate	Free fatty acid receptor 4	FFAR4
C17	arachidonate	Monoglyceride lipase	MGLL
C17	arachidonate	Nuclear receptor coactivator 2	NCOA2
C17	arachidonate	Oxoeicosanoid receptor 1	OXER1
C17	arachidonate	Peroxisome proliferator-activated receptor alpha	PPARA
C17	arachidonate	Peroxisome proliferator-activated receptor delta	PPARD
C17	arachidonate	Peroxisome proliferator-activated receptor gamma	PPARG
C17	arachidonate	Prostaglandin G/H synthase 1	PTGS1
C17	arachidonate	Prostaglandin G/H synthase 2	PTGS2
C17	arachidonate	Retinoic acid receptor RXR-gamma	RXRG
C17	arachidonate	Transient receptor potential cation channel subfamily V member 1	TRPV1
C18	beta-sitosterol	5-hydroxytryptamine 2A receptor	HTR2A
C18	beta-sitosterol	Alpha-1A adrenergic receptor	ADRA1A
C18	beta-sitosterol	Alpha-1B adrenergic receptor	ADRA1B
C18	beta-sitosterol	Apoptosis regulator BAX	BAX
C18	beta-sitosterol	Apoptosis regulator Bcl-2	BCL2
C18	beta-sitosterol	Beta-2 adrenergic receptor	ADRB2
C18	beta-sitosterol	Caspase-3	CASP3
C18	beta-sitosterol	Caspase-8	CASP8
C18	beta-sitosterol	Caspase-9	CASP9
C18	beta-sitosterol	CGMP-inhibited 3',5'-cyclic phosphodiesterase A	PDE3A
C18	beta-sitosterol	Dopamine D1 receptor	DRD1
C18	beta-sitosterol	Gamma-aminobutyric acid receptor subunit alpha-1	GABRA1
C18	beta-sitosterol	Gamma-aminobutyric-acid receptor alpha-2 subunit	GABRA2
C18	beta-sitosterol	Gamma-aminobutyric-acid receptor alpha-3 subunit	GABRA2
C18	beta-sitosterol	Gamma-aminobutyric-acid receptor alpha-5 subunit	GABRA2
C18	beta-sitosterol	Microtubule-associated protein 2	MAP2
C18	beta-sitosterol	Muscarinic acetylcholine receptor M1	CHRM1
C18	beta-sitosterol	Muscarinic acetylcholine receptor M2	CHRM2
C18	beta-sitosterol	Muscarinic acetylcholine receptor M3	CHRM3
C18	beta-sitosterol	Muscarinic acetylcholine receptor M4	CHRM4
C18	beta-sitosterol	Mu-type opioid receptor	OPRM1
C18	beta-sitosterol	Neuronal acetylcholine receptor protein, alpha-7 chain	CHRNA7
C18	beta-sitosterol	Neuronal acetylcholine receptor subunit alpha-2	CHRNA2
C18	beta-sitosterol	NPC1-like intracellular cholesterol transporter 1	NPC1L1
C18	beta-sitosterol	Nuclear receptor coactivator 2	NCOA2
C18	beta-sitosterol	Nuclear receptor ROR-gamma	RORC
C18	beta-sitosterol	Oxysterols receptor LXR-alpha	NR1H3
C18	beta-sitosterol	Oxysterols receptor LXR-beta	NR1H2
C18	beta-sitosterol	Phosphatidylinositol-4,5-bisphosphate 3-kinase catalytic subunit, gamma isoform	PIK3CG
C18	beta-sitosterol	Potassium voltage-gated channel subfamily H member 2	KCNH2
C18	beta-sitosterol	Progesterone receptor	PGR
C18	beta-sitosterol	Prostaglandin G/H synthase 1	PTGS1
C18	beta-sitosterol	Prostaglandin G/H synthase 2	PTGS2
C18	beta-sitosterol	Protein kinase C alpha type	PRKCA
C18	beta-sitosterol	Serum paraoxonase/arylesterase 1	PON1
C18	beta-sitosterol	Sodium channel protein type 5 subunit alpha	SCN5A
C18	beta-sitosterol	Sodium-dependent serotonin transporter	SLC6A4
C18	beta-sitosterol	Steroid 17-alpha-hydroxylase/17,20 lyase	CYP17A1
C18	beta-sitosterol	Sterol regulatory element-binding protein 2	SREBF2
C18	beta-sitosterol	Transcription factor AP-1	JUN
C19	Daucosterol	Nuclear receptor coactivator 2	NCOA2
C19	Daucosterol	Progesterone receptor	PGR
C20	dehydroglyasperins C	Androgen receptor	AR
C20	dehydroglyasperins C	Beta-2 adrenergic receptor	ADRB2
C20	dehydroglyasperins C	Calmodulin-1	CALM1
C20	dehydroglyasperins C	Coagulation factor Xa	F10
C20	dehydroglyasperins C	Cyclin-A2	CCNA2
C20	dehydroglyasperins C	Estrogen receptor	ESR1
C20	dehydroglyasperins C	Estrogen receptor beta	ESR2
C20	dehydroglyasperins C	Mitogen-activated protein kinase 14	MAPK14
C20	dehydroglyasperins C	Nitric oxide synthase, inducible	NOS2
C20	dehydroglyasperins C	Nuclear receptor coactivator 2	NCOA2
C20	dehydroglyasperins C	Peroxisome proliferator activated receptor gamma	PPARG
C20	dehydroglyasperins C	Prostaglandin G/H synthase 2	PTGS2
C20	dehydroglyasperins C	Proto-oncogene serine/threonine-protein kinase Pim-1	PIM1
C20	dehydroglyasperins C	Serine/threonine-protein kinase Chk1	CHEK1
C20	dehydroglyasperins C	Sodium channel protein type 5 subunit alpha	SCN5A
C20	dehydroglyasperins C	Trypsin-1	PRSS1
C21	Deoxyharringtonine	Androgen receptor	AR
C21	Deoxyharringtonine	Mineralocorticoid receptor	NR3C2
C22	DFV	Amine oxidase [flavin-containing] B	MAOB
C22	DFV	Aromatase	CYP19A1
C22	DFV	Beta-2 adrenergic receptor	ADRB2
C22	DFV	cAMP-dependent protein kinase inhibitor alpha	PKIA
C22	DFV	Carbonic anhydrase 4	CA4
C22	DFV	Carbonyl reductase [NADPH] 1	CBR1
C22	DFV	Cytochrome P450 1B1	CYP1B1
C22	DFV	Estrogen receptor	ESR1
C22	DFV	Phosphatidylinositol-4,5-bisphosphate 3-kinase catalytic subunit, gamma isoform	PIK3CG
C22	DFV	Prostaglandin G/H synthase 1	PTGS1
C22	DFV	Prostaglandin G/H synthase 2	PTGS2
C22	DFV	Retinoic acid receptor RXR-alpha	RXRA
C22	DFV	Sodium-dependent serotonin transporter	SLC6A4
C23	Diop	Beta-2 adrenergic receptor	ADRB2
C23	Diop	Muscarinic acetylcholine receptor M3	CHRM3
C23	Diop	Sodium channel protein type 5 subunit alpha	SCN5A
C24	euchrenone	Beta-secretase1	BACE1
C24	euchrenone	Beta-secretase1	0
C24	euchrenone	Calmodulin-1	CALM1
C24	euchrenone	Coagulation factor Xa	F10
C24	euchrenone	Estrogen receptor	ESR1
C24	euchrenone	Estrogen receptor beta	ESR2
C24	euchrenone	Nitric oxide synthase, inducible	NOS2
C24	euchrenone	Potassium voltage-gated channel subfamily H member 2	KCNH2
C24	euchrenone	Prostaglandin G/H synthase 2	PTGS2
C24	euchrenone	Proto-oncogene serine/threonine-protein kinase Pim-1	PIM1
C24	euchrenone	Sodium channel protein type 5 subunit alpha	SCN5A
C25	Eurycarpin A	Androgen receptor	AR
C25	Eurycarpin A	Calmodulin-1	CALM1
C25	Eurycarpin A	Coagulation factor Xa	F10
C25	Eurycarpin A	Cyclin-A2	CCNA2
C25	Eurycarpin A	Dipeptidyl peptidase IV	DPP4
C25	Eurycarpin A	Estrogen receptor	ESR1
C25	Eurycarpin A	Estrogen receptor beta	ESR2
C25	Eurycarpin A	Glycogen synthase kinase-3 beta	GSK3B
C25	Eurycarpin A	Mitogen-activated protein kinase 14	MAPK14
C25	Eurycarpin A	Nitric oxide synthase, inducible	NOS2
C25	Eurycarpin A	Peroxisome proliferator activated receptor gamma	PPARG
C25	Eurycarpin A	Prostaglandin G/H synthase 2	PTGS2
C25	Eurycarpin A	Proto-oncogene serine/threonine-protein kinase Pim-1	PIM1
C25	Eurycarpin A	Serine/threonine-protein kinase Chk1	CHEK1
C25	Eurycarpin A	Sodium channel protein type 5 subunit alpha	SCN5A
C25	Eurycarpin A	Trypsin-1	PRSS1
C25	Eurycarpin A	Tyrosine-protein phosphatase non-receptor type 1	PTPN1
C26	formononetin	3 beta-hydroxysteroid dehydrogenase/Delta 5-->4-isomerase type 1	HSD3B1
C26	formononetin	3 beta-hydroxysteroid dehydrogenase/Delta 5-->4-isomerase type 2	HSD3B2
C26	formononetin	Acetylcholinesterase	ACHE
C26	formononetin	Aldehyde dehydrogenase, mitochondrial	ALDH2
C26	formononetin	Alpha-1A adrenergic receptor	ADRA1A
C26	formononetin	Amine oxidase [flavin-containing] B	MAOB
C26	formononetin	Androgen receptor	AR
C26	formononetin	Aromatase	CYP19A1
C26	formononetin	ATP synthase subunit beta, mitochondrial	ATP5F1B
C26	formononetin	Beta-2 adrenergic receptor	ADRB2
C26	formononetin	Calmodulin-1	CALM1
C26	formononetin	cAMP-dependent protein kinase inhibitor alpha	PKIA
C26	formononetin	Carbonic anhydrase 12	CA12
C26	formononetin	Carbonic anhydrase 4	CA4
C26	formononetin	Carbonic anhydrase 7	CA7
C26	formononetin	Carbonyl reductase [NADPH] 1	CBR1
C26	formononetin	CGMP-inhibited 3',5'-cyclic phosphodiesterase A	PDE3A
C26	formononetin	Cyclin-A2	CCNA2
C26	formononetin	Cytochrome P450 1B1	CYP1B1
C26	formononetin	Dipeptidyl peptidase IV	DPP4
C26	formononetin	Estradiol 17-beta-dehydrogenase 2	HSD17B2
C26	formononetin	Estrogen receptor	ESR1
C26	formononetin	Estrogen receptor beta	ESR2
C26	formononetin	Glycogen synthase kinase-3 beta	GSK3B
C26	formononetin	Interleukin-2	IL2
C26	formononetin	Interleukin-4	IL4
C26	formononetin	Kallikrein-7	KLK7
C26	formononetin	Macrophage migration inhibitory factor	MIF
C26	formononetin	Mitogen-activated protein kinase 14	MAPK14
C26	formononetin	Muscarinic acetylcholine receptor M1	CHRM1
C26	formononetin	NAD-dependent deacetylase sirtuin-1	SIRT1
C26	formononetin	NADH-ubiquinone oxidoreductase chain 6	MT-ND6
C26	formononetin	Nitric oxide synthase, inducible	NOS2
C26	formononetin	Nitric-oxide synthase, endothelial	NOS3
C26	formononetin	Peroxisome proliferator activated receptor gamma	PPARG
C26	formononetin	Peroxisome proliferator-activated receptor gamma	PPARG
C26	formononetin	Prostaglandin G/H synthase 1	PTGS1
C26	formononetin	Prostaglandin G/H synthase 2	PTGS2
C26	formononetin	Proto-oncogene serine/threonine-protein kinase Pim-1	PIM1
C26	formononetin	Retinoic acid receptor RXR-alpha	RXRA
C26	formononetin	Serine/threonine-protein kinase Chk1	CHEK1
C26	formononetin	Sodium-dependent dopamine transporter	SLC6A3
C26	formononetin	Sodium-dependent serotonin transporter	SLC6A4
C26	formononetin	Transcription factor AP-1	JUN
C26	formononetin	Trypsin-1	PRSS1
C27	Frutinone A	Acetylcholinesterase	ACHE
C27	Frutinone A	Androgen receptor	AR
C27	Frutinone A	Beta-2 adrenergic receptor	ADRB2
C27	Frutinone A	CGMP-inhibited 3',5'-cyclic phosphodiesterase A	PDE3A
C27	Frutinone A	Dipeptidyl peptidase IV	DPP4
C27	Frutinone A	Gamma-aminobutyric acid receptor subunit alpha-1	GABRA1
C27	Frutinone A	Neuronal acetylcholine receptor protein, alpha-7 chain	CHRNA7
C27	Frutinone A	Peroxisome proliferator activated receptor gamma	PPARG
C27	Frutinone A	Phosphatidylinositol-4,5-bisphosphate 3-kinase catalytic subunit, gamma isoform	PIK3CG
C27	Frutinone A	Prostaglandin G/H synthase 1	PTGS1
C27	Frutinone A	Prostaglandin G/H synthase 2	PTGS2
C27	Frutinone A	Retinoic acid receptor RXR-alpha	RXRA
C27	Frutinone A	Sodium channel protein type 5 subunit alpha	SCN5A
C28	Fumarine	5-hydroxytryptamine 2A receptor	HTR2A
C28	Fumarine	5-hydroxytryptamine receptor 3A	HTR3A
C28	Fumarine	Alpha-1B adrenergic receptor	ADRA1B
C28	Fumarine	Alpha-1D adrenergic receptor	ADRA1D
C28	Fumarine	Beta-2 adrenergic receptor	ADRB2
C28	Fumarine	Calmodulin-1	CALM1
C28	Fumarine	CGMP-inhibited 3',5'-cyclic phosphodiesterase A	PDE3A
C28	Fumarine	Coagulation factor VII	F7
C28	Fumarine	Coagulation factor Xa	F10
C28	Fumarine	Delta-type opioid receptor	OPRD1
C28	Fumarine	Dopamine D1 receptor	DRD1
C28	Fumarine	Muscarinic acetylcholine receptor M1	CHRM1
C28	Fumarine	Muscarinic acetylcholine receptor M3	CHRM3
C28	Fumarine	Muscarinic acetylcholine receptor M4	CHRM4
C28	Fumarine	Muscarinic acetylcholine receptor M5	CHRM5
C28	Fumarine	Mu-type opioid receptor	OPRM1
C28	Fumarine	Potassium voltage-gated channel subfamily H member 2	KCNH2
C28	Fumarine	Prostaglandin G/H synthase 1	PTGS1
C28	Fumarine	Prostaglandin G/H synthase 2	PTGS2
C28	Fumarine	Sodium channel protein type 5 subunit alpha	SCN5A
C28	Fumarine	Sodium-dependent dopamine transporter	SLC6A3
C28	Fumarine	Sodium-dependent serotonin transporter	SLC6A4
C28	Fumarine	Vascular endothelial growth factor receptor 2	KDR
C28	Fumarine	Voltage-dependent L-type calcium channel subunit alpha-1S	CACNA1S
C29	gadelaidic acid	3-hydroxy-3-methylglutaryl-coenzyme A reductase	HMGCR
C29	gadelaidic acid	Bifunctional epoxide hydrolase 2	EPHX2
C29	gadelaidic acid	DNA topoisomerase 1	TOP1
C29	gadelaidic acid	Fatty acid-binding protein, adipocyte	FABP4
C29	gadelaidic acid	Fatty acid-binding protein, heart	FABP3
C29	gadelaidic acid	Fatty-acid amide hydrolase 1	FAAH
C29	gadelaidic acid	Free fatty acid receptor 4	FFAR4
C29	gadelaidic acid	Liver carboxylesterase 1	CES1
C29	gadelaidic acid	Nuclear receptor coactivator 2	NCOA2
C29	gadelaidic acid	Oxoeicosanoid receptor 1	OXER1
C29	gadelaidic acid	Peroxisome proliferator-activated receptor alpha	PPARA
C29	gadelaidic acid	Peroxisome proliferator-activated receptor delta	PPARD
C29	gadelaidic acid	Peroxisome proliferator-activated receptor gamma	PPARG
C29	gadelaidic acid	Solute carrier family 22 member 6	SLC22A6
C29	gadelaidic acid	Solute carrier family 22 member 8	SLC22A8
C29	gadelaidic acid	Toll-like receptor 2	TLR2
C29	gadelaidic acid	Tyrosine-protein phosphatase non-receptor type 7	PTPN7
C30	Gancaonin A	Acetylcholinesterase	ACHE
C30	Gancaonin A	Androgen receptor	AR
C30	Gancaonin A	Calmodulin-1	CALM1
C30	Gancaonin A	Coagulation factor Xa	F10
C30	Gancaonin A	Cyclin-A2	CCNA2
C30	Gancaonin A	Dipeptidyl peptidase IV	DPP4
C30	Gancaonin A	Estrogen receptor	ESR1
C30	Gancaonin A	Estrogen receptor beta	ESR2
C30	Gancaonin A	Glycogen synthase kinase-3 beta	GSK3B
C30	Gancaonin A	Multidrug resistance protein 1	ABCB1
C30	Gancaonin A	Nitric oxide synthase, inducible	NOS2
C30	Gancaonin A	Nuclear receptor coactivator 2	NCOA2
C30	Gancaonin A	Peroxisome proliferator activated receptor gamma	PPARG
C30	Gancaonin A	Prostaglandin G/H synthase 2	PTGS2
C30	Gancaonin A	Proto-oncogene serine/threonine-protein kinase Pim-1	PIM1
C30	Gancaonin A	Serine/threonine-protein kinase Chk1	CHEK1
C30	Gancaonin A	Sodium channel protein type 5 subunit alpha	SCN5A
C30	Gancaonin A	Trypsin-1	PRSS1
C30	Gancaonin A	Tyrosine-protein phosphatase non-receptor type 1	PTPN1
C31	Gancaonin B	Alpha-1B adrenergic receptor	ADRA1B
C31	Gancaonin B	Androgen receptor	AR
C31	Gancaonin B	Beta-2 adrenergic receptor	ADRB2
C31	Gancaonin B	Calmodulin-1	CALM1
C31	Gancaonin B	Coagulation factor VII	F7
C31	Gancaonin B	Coagulation factor Xa	F10
C31	Gancaonin B	Cyclin-A2	CCNA2
C31	Gancaonin B	Dipeptidyl peptidase IV	DPP4
C31	Gancaonin B	Estrogen receptor	ESR1
C31	Gancaonin B	Estrogen receptor beta	ESR2
C31	Gancaonin B	Glycogen synthase kinase-3 beta	GSK3B
C31	Gancaonin B	Nitric oxide synthase, inducible	NOS2
C31	Gancaonin B	Nuclear receptor coactivator 2	NCOA2
C31	Gancaonin B	Peroxisome proliferator activated receptor gamma	PPARG
C31	Gancaonin B	Prostaglandin G/H synthase 2	PTGS2
C31	Gancaonin B	Proto-oncogene serine/threonine-protein kinase Pim-1	PIM1
C31	Gancaonin B	Serine/threonine-protein kinase Chk1	CHEK1
C31	Gancaonin B	Trypsin-1	PRSS1
C31	Gancaonin B	Tyrosine-protein phosphatase non-receptor type 1	PTPN1
C31	Gancaonin B	Vascular endothelial growth factor receptor 2	KDR
C32	Gancaonin G	Androgen receptor	AR
C32	Gancaonin G	Calmodulin-1	CALM1
C32	Gancaonin G	Coagulation factor Xa	F10
C32	Gancaonin G	Cyclin-A2	CCNA2
C32	Gancaonin G	Dipeptidyl peptidase IV	DPP4
C32	Gancaonin G	Estrogen receptor	ESR1
C32	Gancaonin G	Estrogen receptor beta	ESR2
C32	Gancaonin G	Glycogen synthase kinase-3 beta	GSK3B
C32	Gancaonin G	Mitogen-activated protein kinase 14	MAPK14
C32	Gancaonin G	Nitric oxide synthase, inducible	NOS2
C32	Gancaonin G	Nitric-oxide synthase, endothelial	NOS3
C32	Gancaonin G	Nuclear receptor coactivator 2	NCOA2
C32	Gancaonin G	Peroxisome proliferator activated receptor gamma	PPARG
C32	Gancaonin G	Prostaglandin G/H synthase 2	PTGS2
C32	Gancaonin G	Proto-oncogene serine/threonine-protein kinase Pim-1	PIM1
C32	Gancaonin G	Serine/threonine-protein kinase Chk1	CHEK1
C32	Gancaonin G	Trypsin-1	PRSS1
C32	Gancaonin G	Tyrosine-protein phosphatase non-receptor type 1	PTPN1
C33	Gancaonin H	Androgen receptor	AR
C33	Gancaonin H	Calmodulin-1	CALM1
C33	Gancaonin H	Coagulation factor Xa	F10
C33	Gancaonin H	Cyclin-A2	CCNA2
C33	Gancaonin H	Estrogen receptor	ESR1
C33	Gancaonin H	Nuclear receptor coactivator 2	NCOA2
C33	Gancaonin H	Prostaglandin G/H synthase 2	PTGS2
C33	Gancaonin H	Proto-oncogene serine/threonine-protein kinase Pim-1	PIM1
C33	Gancaonin H	Trypsin-1	PRSS1
C33	Gancaonin H	Tyrosine-protein phosphatase non-receptor type 1	PTPN1
C33	Gancaonin H	Vascular endothelial growth factor receptor 2	KDR
C34	Ginsenoside-Rh4_qt	Mineralocorticoid receptor	NR3C2
C35	Girinimbin	Beta-2 adrenergic receptor	ADRB2
C35	Girinimbin	Gamma-aminobutyric acid receptor subunit alpha-1	GABRA1
C35	Girinimbin	Neuronal acetylcholine receptor protein, alpha-7 chain	CHRNA7
C35	Girinimbin	Nuclear receptor coactivator 2	NCOA2
C35	Girinimbin	Phosphatidylinositol-4,5-bisphosphate 3-kinase catalytic subunit, gamma isoform	PIK3CG
C35	Girinimbin	Prostaglandin G/H synthase 1	PTGS1
C35	Girinimbin	Prostaglandin G/H synthase 2	PTGS2
C35	Girinimbin	Retinoic acid receptor RXR-alpha	RXRA
C35	Girinimbin	Sodium channel protein type 5 subunit alpha	SCN5A
C35	Girinimbin	X-box-binding protein 1	XBP1
C36	Glabranin	Aromatase	CYP19A1
C36	Glabranin	ATP-binding cassette sub-family G member 2	ABCG2
C36	Glabranin	Calmodulin-1	CALM1
C36	Glabranin	CGMP-inhibited 3',5'-cyclic phosphodiesterase A	PDE3A
C36	Glabranin	Coagulation factor Xa	F10
C36	Glabranin	Estrogen receptor	ESR1
C36	Glabranin	Nitric oxide synthase, inducible	NOS2
C36	Glabranin	Nitric-oxide synthase, endothelial	NOS3
C36	Glabranin	Prostaglandin G/H synthase 1	PTGS1
C36	Glabranin	Prostaglandin G/H synthase 2	PTGS2
C36	Glabranin	Sodium channel protein type 5 subunit alpha	SCN5A
C37	Glabrene	Androgen receptor	AR
C37	Glabrene	Beta-2 adrenergic receptor	ADRB2
C37	Glabrene	Calmodulin-1	CALM1
C37	Glabrene	Coagulation factor Xa	F10
C37	Glabrene	Estrogen receptor	ESR1
C37	Glabrene	Estrogen receptor beta	ESR2
C37	Glabrene	Glycogen synthase kinase-3 beta	GSK3B
C37	Glabrene	Mitogen-activated protein kinase 14	MAPK14
C37	Glabrene	Nitric oxide synthase, inducible	NOS2
C37	Glabrene	Nuclear receptor coactivator 2	NCOA2
C37	Glabrene	Peroxisome proliferator activated receptor gamma	PPARG
C37	Glabrene	Prostaglandin G/H synthase 1	PTGS1
C37	Glabrene	Prostaglandin G/H synthase 2	PTGS2
C37	Glabrene	Proto-oncogene serine/threonine-protein kinase Pim-1	PIM1
C37	Glabrene	Retinoic acid receptor RXR-alpha	RXRA
C37	Glabrene	Sodium channel protein type 5 subunit alpha	SCN5A
C37	Glabrene	Trypsin-1	PRSS1
C37	Glabrene	Tyrosinase	TYR
C38	Glabridin	Acetylcholinesterase	ACHE
C38	Glabridin	Alpha-1B adrenergic receptor	ADRA1B
C38	Glabridin	Androgen receptor	AR
C38	Glabridin	Beta-2 adrenergic receptor	ADRB2
C38	Glabridin	Calmodulin-1	CALM1
C38	Glabridin	Cyclin-A2	CCNA2
C38	Glabridin	Estrogen receptor	ESR1
C38	Glabridin	Estrogen receptor beta	ESR2
C38	Glabridin	Glycogen synthase kinase-3 beta	GSK3B
C38	Glabridin	Heat shock protein HSP 90-alpha	HSP90AA1
C38	Glabridin	Mitogen-activated protein kinase 14	MAPK14
C38	Glabridin	Muscarinic acetylcholine receptor M1	CHRM1
C38	Glabridin	Nitric oxide synthase, inducible	NOS2
C38	Glabridin	Nuclear receptor coactivator 1	NCOA1
C38	Glabridin	Nuclear receptor coactivator 2	NCOA2
C38	Glabridin	Peroxisome proliferator activated receptor gamma	PPARG
C38	Glabridin	Prostaglandin G/H synthase 2	PTGS2
C38	Glabridin	Proto-oncogene serine/threonine-protein kinase Pim-1	PIM1
C38	Glabridin	Retinoic acid receptor RXR-alpha	RXRA
C38	Glabridin	Retinoic acid receptor RXR-beta	RXRB
C38	Glabridin	Serine/threonine-protein kinase Chk1	CHEK1
C38	Glabridin	Sodium channel protein type 5 subunit alpha	SCN5A
C38	Glabridin	Trypsin-1	PRSS1
C38	Glabridin	Tyrosinase	TYR
C39	Glabrone	Acetylcholinesterase	ACHE
C39	Glabrone	Androgen receptor	AR
C39	Glabrone	Calmodulin-1	CALM1
C39	Glabrone	Coagulation factor Xa	F10
C39	Glabrone	Cyclin-A2	CCNA2
C39	Glabrone	Dipeptidyl peptidase IV	DPP4
C39	Glabrone	Estrogen receptor	ESR1
C39	Glabrone	Estrogen receptor beta	ESR2
C39	Glabrone	Glycogen synthase kinase-3 beta	GSK3B
C39	Glabrone	Mitogen-activated protein kinase 14	MAPK14
C39	Glabrone	Nitric oxide synthase, inducible	NOS2
C39	Glabrone	Peroxisome proliferator activated receptor gamma	PPARG
C39	Glabrone	Prostaglandin G/H synthase 1	PTGS1
C39	Glabrone	Prostaglandin G/H synthase 2	PTGS2
C39	Glabrone	Proto-oncogene serine/threonine-protein kinase Pim-1	PIM1
C39	Glabrone	Retinoic acid receptor RXR-alpha	RXRA
C39	Glabrone	Serine/threonine-protein kinase Chk1	CHEK1
C39	Glabrone	Sodium channel protein type 5 subunit alpha	SCN5A
C39	Glabrone	Trypsin-1	PRSS1
C40	Glepidotin A	Androgen receptor	AR
C40	Glepidotin A	Calmodulin-1	CALM1
C40	Glepidotin A	CGMP-inhibited 3',5'-cyclic phosphodiesterase A	PDE3A
C40	Glepidotin A	Coagulation factor VII	F7
C40	Glepidotin A	Coagulation factor Xa	F10
C40	Glepidotin A	Cyclin-A2	CCNA2
C40	Glepidotin A	Dipeptidyl peptidase IV	DPP4
C40	Glepidotin A	Estrogen receptor	ESR1
C40	Glepidotin A	Glycogen synthase kinase-3 beta	GSK3B
C40	Glepidotin A	Mitogen-activated protein kinase 14	MAPK14
C40	Glepidotin A	Multidrug resistance protein 1	ABCB1
C40	Glepidotin A	Nitric oxide synthase, inducible	NOS2
C40	Glepidotin A	Nitric-oxide synthase, endothelial	NOS3
C40	Glepidotin A	Peroxisome proliferator activated receptor gamma	PPARG
C40	Glepidotin A	Prostaglandin G/H synthase 1	PTGS1
C40	Glepidotin A	Prostaglandin G/H synthase 2	PTGS2
C40	Glepidotin A	Proto-oncogene serine/threonine-protein kinase Pim-1	PIM1
C40	Glepidotin A	Retinoic acid receptor RXR-alpha	RXRA
C40	Glepidotin A	Serine/threonine-protein kinase Chk1	CHEK1
C40	Glepidotin A	Sodium channel protein type 5 subunit alpha	SCN5A
C40	Glepidotin A	Trypsin-1	PRSS1
C40	Glepidotin A	Vascular endothelial growth factor receptor 2	KDR
C41	Glepidotin B	Alpha-1B adrenergic receptor	ADRA1B
C41	Glepidotin B	Calmodulin-1	CALM1
C41	Glepidotin B	CGMP-inhibited 3',5'-cyclic phosphodiesterase A	PDE3A
C41	Glepidotin B	Coagulation factor VII	F7
C41	Glepidotin B	Coagulation factor Xa	F10
C41	Glepidotin B	Estrogen receptor	ESR1
C41	Glepidotin B	Nitric-oxide synthase, endothelial	NOS3
C41	Glepidotin B	Nuclear receptor coactivator 1	NCOA1
C41	Glepidotin B	Prostaglandin G/H synthase 1	PTGS1
C41	Glepidotin B	Prostaglandin G/H synthase 2	PTGS2
C41	Glepidotin B	Retinoic acid receptor RXR-alpha	RXRA
C41	Glepidotin B	Sodium channel protein type 5 subunit alpha	SCN5A
C42	glyasperin B	Acetylcholinesterase	ACHE
C42	glyasperin B	Androgen receptor	AR
C42	glyasperin B	Calmodulin-1	CALM1
C42	glyasperin B	Coagulation factor VII	F7
C42	glyasperin B	Coagulation factor Xa	F10
C42	glyasperin B	Cyclin-A2	CCNA2
C42	glyasperin B	Dipeptidyl peptidase IV	DPP4
C42	glyasperin B	Estrogen receptor	ESR1
C42	glyasperin B	Estrogen receptor beta	ESR2
C42	glyasperin B	Glycogen synthase kinase-3 beta	GSK3B
C42	glyasperin B	Nitric oxide synthase, inducible	NOS2
C42	glyasperin B	Nuclear receptor coactivator 2	NCOA2
C42	glyasperin B	Peroxisome proliferator activated receptor gamma	PPARG
C42	glyasperin B	Prostaglandin G/H synthase 2	PTGS2
C42	glyasperin B	Proto-oncogene serine/threonine-protein kinase Pim-1	PIM1
C42	glyasperin B	Trypsin-1	PRSS1
C42	glyasperin B	Vascular endothelial growth factor receptor 2	KDR
C43	Glyasperin C	Acetylcholinesterase	ACHE
C43	Glyasperin C	Androgen receptor	AR
C43	Glyasperin C	Calmodulin-1	CALM1
C43	Glyasperin C	Coagulation factor Xa	F10
C43	Glyasperin C	Cyclin-A2	CCNA2
C43	Glyasperin C	Dipeptidyl peptidase IV	DPP4
C43	Glyasperin C	Estrogen receptor	ESR1
C43	Glyasperin C	Estrogen receptor beta	ESR2
C43	Glyasperin C	Glycogen synthase kinase-3 beta	GSK3B
C43	Glyasperin C	Mitogen-activated protein kinase 14	MAPK14
C43	Glyasperin C	Nitric oxide synthase, inducible	NOS2
C43	Glyasperin C	Nuclear receptor coactivator 2	NCOA2
C43	Glyasperin C	Peroxisome proliferator activated receptor gamma	PPARG
C43	Glyasperin C	Potassium voltage-gated channel subfamily H member 2	KCNH2
C43	Glyasperin C	Prostaglandin G/H synthase 2	PTGS2
C43	Glyasperin C	Proto-oncogene serine/threonine-protein kinase Pim-1	PIM1
C43	Glyasperin C	Retinoic acid receptor RXR-alpha	RXRA
C43	Glyasperin C	Serine/threonine-protein kinase Chk1	CHEK1
C43	Glyasperin C	Sodium channel protein type 5 subunit alpha	SCN5A
C43	Glyasperin C	Trypsin-1	PRSS1
C43	Glyasperin C	Tyrosinase	TYR
C44	glyasperin F	Androgen receptor	AR
C44	glyasperin F	Calmodulin-1	CALM1
C44	glyasperin F	Coagulation factor Xa	F10
C44	glyasperin F	Cyclin-A2	CCNA2
C44	glyasperin F	Estrogen receptor	ESR1
C44	glyasperin F	Estrogen receptor beta	ESR2
C44	glyasperin F	Glycogen synthase kinase-3 beta	GSK3B
C44	glyasperin F	Mitogen-activated protein kinase 14	MAPK14
C44	glyasperin F	Nitric oxide synthase, inducible	NOS2
C44	glyasperin F	Peroxisome proliferator activated receptor gamma	PPARG
C44	glyasperin F	Prostaglandin G/H synthase 1	PTGS1
C44	glyasperin F	Prostaglandin G/H synthase 2	PTGS2
C44	glyasperin F	Proto-oncogene serine/threonine-protein kinase Pim-1	PIM1
C44	glyasperin F	Sodium channel protein type 5 subunit alpha	SCN5A
C44	glyasperin F	Trypsin-1	PRSS1
C45	Glyasperins M	Acetylcholinesterase	ACHE
C45	Glyasperins M	Androgen receptor	AR
C45	Glyasperins M	Calcium-activated potassium channel subunit alpha 1	KCNMA1
C45	Glyasperins M	Calmodulin-1	CALM1
C45	Glyasperins M	Coagulation factor VII	F7
C45	Glyasperins M	Coagulation factor Xa	F10
C45	Glyasperins M	Cyclin-A2	CCNA2
C45	Glyasperins M	Estrogen receptor	ESR1
C45	Glyasperins M	Estrogen receptor beta	ESR2
C45	Glyasperins M	Glycogen synthase kinase-3 beta	GSK3B
C45	Glyasperins M	Nitric oxide synthase, inducible	NOS2
C45	Glyasperins M	Nuclear receptor coactivator 1	NCOA1
C45	Glyasperins M	Nuclear receptor coactivator 2	NCOA2
C45	Glyasperins M	Peroxisome proliferator activated receptor delta	PPARD
C45	Glyasperins M	Peroxisome proliferator activated receptor gamma	PPARG
C45	Glyasperins M	Potassium voltage-gated channel subfamily H member 2	KCNH2
C45	Glyasperins M	Prostaglandin G/H synthase 1	PTGS1
C45	Glyasperins M	Prostaglandin G/H synthase 2	PTGS2
C45	Glyasperins M	Proto-oncogene serine/threonine-protein kinase Pim-1	PIM1
C45	Glyasperins M	Sodium channel protein type 5 subunit alpha	SCN5A
C45	Glyasperins M	Trypsin-1	PRSS1
C45	Glyasperins M	Vascular endothelial growth factor receptor 2	KDR
C46	Glycyrin	Androgen receptor	AR
C46	Glycyrin	Calmodulin-1	CALM1
C46	Glycyrin	Coagulation factor Xa	F10
C46	Glycyrin	Dipeptidyl peptidase IV	DPP4
C46	Glycyrin	Estrogen receptor	ESR1
C46	Glycyrin	Estrogen receptor beta	ESR2
C46	Glycyrin	Nitric oxide synthase, inducible	NOS2
C46	Glycyrin	Nuclear receptor coactivator 2	NCOA2
C46	Glycyrin	Peroxisome proliferator activated receptor gamma	PPARG
C46	Glycyrin	Potassium voltage-gated channel subfamily H member 2	KCNH2
C46	Glycyrin	Prostaglandin G/H synthase 2	PTGS2
C46	Glycyrin	Proto-oncogene serine/threonine-protein kinase Pim-1	PIM1
C46	Glycyrin	Serine/threonine-protein kinase Chk1	CHEK1
C46	Glycyrin	Trypsin-1	PRSS1
C46	Glycyrin	Vascular endothelial growth factor receptor 2	KDR
C47	Glycyrol	Cyclin-A2	CCNA2
C47	Glycyrol	Estrogen receptor	ESR1
C47	Glycyrol	Glycogen synthase kinase-3 beta	GSK3B
C47	Glycyrol	Mitogen-activated protein kinase 14	MAPK14
C47	Glycyrol	Nitric oxide synthase, inducible	NOS2
C47	Glycyrol	Peroxisome proliferator activated receptor gamma	PPARG
C47	Glycyrol	Prostaglandin G/H synthase 2	PTGS2
C47	Glycyrol	Proto-oncogene serine/threonine-protein kinase Pim-1	PIM1
C47	Glycyrol	Serine/threonine-protein kinase Chk1	CHEK1
C47	Glycyrol	Vascular endothelial growth factor receptor 2	KDR
C48	Glypallichalcone	Alpha-1B adrenergic receptor	ADRA1B
C48	Glypallichalcone	Amine oxidase [flavin-containing] B	MAOB
C48	Glypallichalcone	Androgen receptor	AR
C48	Glypallichalcone	ATP-binding cassette sub-family G member 2	ABCG2
C48	Glypallichalcone	Beta-2 adrenergic receptor	ADRB2
C48	Glypallichalcone	Calmodulin-1	CALM1
C48	Glypallichalcone	cAMP-dependent protein kinase inhibitor alpha	PKIA
C48	Glypallichalcone	Carbonic anhydrase II	CA2
C48	Glypallichalcone	CGMP-inhibited 3',5'-cyclic phosphodiesterase A	PDE3A
C48	Glypallichalcone	Cyclin-A2	CCNA2
C48	Glypallichalcone	Estrogen receptor	ESR1
C48	Glypallichalcone	Estrogen receptor beta	ESR2
C48	Glypallichalcone	Glycogen synthase kinase-3 beta	GSK3B
C48	Glypallichalcone	Leukotriene A-4 hydrolase	LTA4H
C48	Glypallichalcone	Mitogen-activated protein kinase 14	MAPK14
C48	Glypallichalcone	Muscarinic acetylcholine receptor M1	CHRM1
C48	Glypallichalcone	Neuronal acetylcholine receptor subunit alpha-7	CHRNA7
C48	Glypallichalcone	Nitric oxide synthase, inducible	NOS2
C48	Glypallichalcone	Nuclear receptor coactivator 1	NCOA1
C48	Glypallichalcone	Peroxisome proliferator activated receptor gamma	PPARG
C48	Glypallichalcone	Prostaglandin G/H synthase 1	PTGS1
C48	Glypallichalcone	Prostaglandin G/H synthase 2	PTGS2
C48	Glypallichalcone	Serine/threonine-protein kinase Chk1	CHEK1
C48	Glypallichalcone	Sodium channel protein type 5 subunit alpha	SCN5A
C48	Glypallichalcone	Sodium-dependent dopamine transporter	SLC6A3
C48	Glypallichalcone	Sodium-dependent serotonin transporter	SLC6A4
C48	Glypallichalcone	Tissue factor	F3
C48	Glypallichalcone	Tyrosine-protein phosphatase non-receptor type 1	PTPN1
C49	Glyzaglabrin	Androgen receptor	AR
C49	Glyzaglabrin	Cyclin-A2	CCNA2
C49	Glyzaglabrin	Dipeptidyl peptidase IV	DPP4
C49	Glyzaglabrin	Estrogen receptor	ESR1
C49	Glyzaglabrin	Estrogen receptor beta	ESR2
C49	Glyzaglabrin	Glycogen synthase kinase-3 beta	GSK3B
C49	Glyzaglabrin	Mitogen-activated protein kinase 14	MAPK14
C49	Glyzaglabrin	Nitric oxide synthase, inducible	NOS2
C49	Glyzaglabrin	Peroxisome proliferator activated receptor gamma	PPARG
C49	Glyzaglabrin	Phosphatidylinositol-4,5-bisphosphate 3-kinase catalytic subunit, gamma isoform	PIK3CG
C49	Glyzaglabrin	Prostaglandin G/H synthase 1	PTGS1
C49	Glyzaglabrin	Prostaglandin G/H synthase 2	PTGS2
C49	Glyzaglabrin	Proto-oncogene serine/threonine-protein kinase Pim-1	PIM1
C49	Glyzaglabrin	Serine/threonine-protein kinase Chk1	CHEK1
C49	Glyzaglabrin	Trypsin-1	PRSS1
C50	harmine	5-hydroxytryptamine receptor 2C	HTR2C
C50	harmine	5-hydroxytryptamine receptor 6	HTR6
C50	harmine	5-hydroxytryptamine receptor 7	HTR7
C50	harmine	Alpha-2A adrenergic receptor	ADRA2A
C50	harmine	Alpha-2B adrenergic receptor	ADRA2B
C50	harmine	Alpha-2C adrenergic receptor	ADRA2C
C50	harmine	Amine oxidase [flavin-containing] A	MAOA
C50	harmine	Casein kinase I isoform delta	CSNK1D
C50	harmine	Casein kinase I isoform epsilon	CSNK1E
C50	harmine	Cyclin-A2	CCNA2
C50	harmine	Cyclin-dependent kinase 2	CDK2
C50	harmine	Cyclin-dependent kinase 5 activator 1	CDK5R1
C50	harmine	Cyclin-dependent kinase 9	CDK9
C50	harmine	Cyclin-dependent-like kinase 5	CDK5
C50	harmine	Cyclin-T1	CCNT1
C50	harmine	Cytochrome P450 1A2	CYP1A2
C50	harmine	Dual specificity protein kinase CLK1	CLK1
C50	harmine	Dual specificity tyrosine-phosphorylation-regulated kinase 1A	DYRK1A
C50	harmine	Dual specificity tyrosine-phosphorylation-regulated kinase 1B	DYRK1B
C50	harmine	Dual specificity tyrosine-phosphorylation-regulated kinase 2	DYRK2
C50	harmine	Dual specificity tyrosine-phosphorylation-regulated kinase 3	DYRK3
C50	harmine	Dual specificity tyrosine-phosphorylation-regulated kinase 4	DYRK4
C50	harmine	Serine/threonine-protein kinase haspin	HASPIN
C50	harmine	Serine/threonine-protein kinase pim-3	PIM3
C50	harmine	Sodium-dependent noradrenaline transporter	SLC6A2
C51	HMO	Aldehyde dehydrogenase, mitochondrial	ALDH2
C51	HMO	Amine oxidase [flavin-containing] B	MAOB
C51	HMO	Androgen receptor	AR
C51	HMO	Arachidonate 12-lipoxygenase, 12S-type	ALOX12
C51	HMO	Beta-2 adrenergic receptor	ADRB2
C51	HMO	Calmodulin-1	CALM1
C51	HMO	cAMP-dependent protein kinase inhibitor alpha	PKIA
C51	HMO	Carbonic anhydrase 4	CA4
C51	HMO	Carbonic anhydrase 7	CA7
C51	HMO	CGMP-inhibited 3',5'-cyclic phosphodiesterase A	PDE3A
C51	HMO	Cyclin-A2	CCNA2
C51	HMO	Cytochrome P450 1B1	CYP1B1
C51	HMO	Dipeptidyl peptidase IV	DPP4
C51	HMO	Estrogen receptor	ESR1
C51	HMO	Estrogen receptor beta	ESR2
C51	HMO	Glycogen synthase kinase-3 beta	GSK3B
C51	HMO	Interleukin-2	IL2
C51	HMO	Kallikrein-7	KLK7
C51	HMO	Mitogen-activated protein kinase 14	MAPK14
C51	HMO	Muscarinic acetylcholine receptor M1	CHRM1
C51	HMO	Nitric oxide synthase, inducible	NOS2
C51	HMO	Peroxisome proliferator activated receptor gamma	PPARG
C51	HMO	Prostaglandin G/H synthase 1	PTGS1
C51	HMO	Prostaglandin G/H synthase 2	PTGS2
C51	HMO	Proto-oncogene serine/threonine-protein kinase Pim-1	PIM1
C51	HMO	Retinoic acid receptor RXR-alpha	RXRA
C51	HMO	Serine/threonine-protein kinase Chk1	CHEK1
C51	HMO	Sodium channel protein type 5 subunit alpha	SCN5A
C51	HMO	Sodium-dependent dopamine transporter	SLC6A3
C51	HMO	Sodium-dependent serotonin transporter	SLC6A4
C51	HMO	Trypsin-1	PRSS1
C52	icos-5-enoic acid	Bifunctional epoxide hydrolase 2	EPHX2
C52	icos-5-enoic acid	DNA topoisomerase 1	TOP1
C52	icos-5-enoic acid	Fatty acid-binding protein, adipocyte	FABP4
C52	icos-5-enoic acid	Fatty acid-binding protein, heart	FABP3
C52	icos-5-enoic acid	Fatty-acid amide hydrolase 1	FAAH
C52	icos-5-enoic acid	Free fatty acid receptor 4	FFAR4
C52	icos-5-enoic acid	Nuclear receptor coactivator 2	NCOA2
C52	icos-5-enoic acid	Oxoeicosanoid receptor 1	OXER1
C52	icos-5-enoic acid	Peroxisome proliferator-activated receptor alpha	PPARA
C52	icos-5-enoic acid	Peroxisome proliferator-activated receptor delta	PPARD
C52	icos-5-enoic acid	Peroxisome proliferator-activated receptor gamma	PPARG
C52	icos-5-enoic acid	Solute carrier family 22 member 6	SLC22A6
C52	icos-5-enoic acid	Solute carrier family 22 member 8	SLC22A8
C52	icos-5-enoic acid	Toll-like receptor 2	TLR2
C53	Inermin	5-hydroxytryptamine receptor 3A	HTR3A
C53	Inermin	Alpha-1B adrenergic receptor	ADRA1B
C53	Inermin	Alpha-1D adrenergic receptor	ADRA1D
C53	Inermin	Beta-2 adrenergic receptor	ADRB2
C53	Inermin	Calmodulin-1	CALM1
C53	Inermin	Muscarinic acetylcholine receptor M3	CHRM3
C53	Inermin	Neuronal acetylcholine receptor protein, alpha-7 chain	CHRNA7
C53	Inermin	Nuclear receptor coactivator 1	NCOA1
C53	Inermin	Phosphatidylinositol-4,5-bisphosphate 3-kinase catalytic subunit, gamma isoform	PIK3CG
C53	Inermin	Prostaglandin G/H synthase 1	PTGS1
C53	Inermin	Prostaglandin G/H synthase 2	PTGS2
C53	Inermin	Retinoic acid receptor RXR-alpha	RXRA
C53	Inermin	Sodium channel protein type 5 subunit alpha	SCN5A
C53	Inermin	Sodium-dependent serotonin transporter	SLC6A4
C53	Inermin	Trypsin-1	PRSS1
C54	Inermine	5-hydroxytryptamine receptor 3A	HTR3A
C54	Inermine	Alpha-1B adrenergic receptor	ADRA1B
C54	Inermine	Alpha-1D adrenergic receptor	ADRA1D
C54	Inermine	Beta-2 adrenergic receptor	ADRB2
C54	Inermine	Calmodulin-1	CALM1
C54	Inermine	Muscarinic acetylcholine receptor M1	CHRM1
C54	Inermine	Muscarinic acetylcholine receptor M3	CHRM3
C54	Inermine	Mu-type opioid receptor	OPRM1
C54	Inermine	Phosphatidylinositol-4,5-bisphosphate 3-kinase catalytic subunit, gamma isoform	PIK3CG
C54	Inermine	Prostaglandin G/H synthase 1	PTGS1
C54	Inermine	Prostaglandin G/H synthase 2	PTGS2
C54	Inermine	Retinoic acid receptor RXR-alpha	RXRA
C54	Inermine	Sodium channel protein type 5 subunit alpha	SCN5A
C54	Inermine	Trypsin-1	PRSS1
C55	Inflacoumarin A	Androgen receptor	AR
C55	Inflacoumarin A	Beta-2 adrenergic receptor	ADRB2
C55	Inflacoumarin A	Calmodulin-1	CALM1
C55	Inflacoumarin A	Coagulation factor Xa	F10
C55	Inflacoumarin A	Dipeptidyl peptidase IV	DPP4
C55	Inflacoumarin A	Estrogen receptor	ESR1
C55	Inflacoumarin A	Nuclear receptor coactivator 2	NCOA2
C55	Inflacoumarin A	Peroxisome proliferator activated receptor gamma	PPARG
C55	Inflacoumarin A	Prostaglandin G/H synthase 1	PTGS1
C55	Inflacoumarin A	Prostaglandin G/H synthase 2	PTGS2
C55	Inflacoumarin A	Proto-oncogene serine/threonine-protein kinase Pim-1	PIM1
C55	Inflacoumarin A	Sodium channel protein type 5 subunit alpha	SCN5A
C55	Inflacoumarin A	Trypsin-1	PRSS1
C56	Isoglycyrol	Androgen receptor	AR
C56	Isoglycyrol	Dipeptidyl peptidase IV	DPP4
C56	Isoglycyrol	Estrogen receptor	ESR1
C56	Isoglycyrol	Glycogen synthase kinase-3 beta	GSK3B
C56	Isoglycyrol	Nitric oxide synthase, inducible	NOS2
C56	Isoglycyrol	Prostaglandin G/H synthase 2	PTGS2
C56	Isoglycyrol	Proto-oncogene serine/threonine-protein kinase Pim-1	PIM1
C57	isorhamnetin	Acetylcholinesterase	ACHE
C57	isorhamnetin	Aldose reductase	AKR1B1
C57	isorhamnetin	Amine oxidase [flavin-containing] A	MAOA
C57	isorhamnetin	Amine oxidase [flavin-containing] B	MAOB
C57	isorhamnetin	Amyloid-beta A4 protein	APP
C57	isorhamnetin	Androgen receptor	AR
C57	isorhamnetin	Arachidonate 12-lipoxygenase, 12S-type	ALOX12
C57	isorhamnetin	Arachidonate 15-lipoxygenase	ALOX15
C57	isorhamnetin	Arachidonate 5-lipoxygenase	ALOX5
C57	isorhamnetin	ATP-binding cassette sub-family G member 2	ABCG2
C57	isorhamnetin	Calcium/calmodulin-dependent protein kinase type II subunit beta	CAMK2B
C57	isorhamnetin	Calmodulin-1	CALM1
C57	isorhamnetin	Carbonic anhydrase 12	CA12
C57	isorhamnetin	Carbonic anhydrase 2	CA2
C57	isorhamnetin	Carbonic anhydrase 3	CA3
C57	isorhamnetin	Carbonic anhydrase 4	CA4
C57	isorhamnetin	Carbonic anhydrase 5A, mitochondrial	CA5A
C57	isorhamnetin	Carbonic anhydrase 6	CA6
C57	isorhamnetin	Carbonic anhydrase 7	CA7
C57	isorhamnetin	C-C chemokine receptor type 4	CCR4
C57	isorhamnetin	CDGSH iron-sulfur domain-containing protein 1	CISD1
C57	isorhamnetin	Coagulation factor VII	F7
C57	isorhamnetin	Cyclin-A2	CCNA2
C57	isorhamnetin	Cytochrome P450 1B1	CYP1B1
C57	isorhamnetin	Cytochrome P450 2C8	CYP2C8
C57	isorhamnetin	Death-associated protein kinase 1	DAPK1
C57	isorhamnetin	Dipeptidyl peptidase IV	DPP4
C57	isorhamnetin	DNA-(apurinic or apyrimidinic site) lyase	APEX1
C57	isorhamnetin	ELAV-like protein 1	ELAVL1
C57	isorhamnetin	Estradiol 17-beta-dehydrogenase 2	HSD17B2
C57	isorhamnetin	Estrogen receptor	ESR1
C57	isorhamnetin	Estrogen receptor beta	ESR2
C57	isorhamnetin	Gamma-aminobutyric acid receptor subunit alpha-1	GABRA1
C57	isorhamnetin	Glutamate receptor 2	GRIA2
C57	isorhamnetin	Glycogen phosphorylase, muscle form	PYGM
C57	isorhamnetin	Glycogen synthase kinase-3 beta	GSK3B
C57	isorhamnetin	G-protein coupled receptor 35	GPR35
C57	isorhamnetin	Lactoylglutathione lyase	GLO1
C57	isorhamnetin	Lysine-specific demethylase 4E	KDM4E
C57	isorhamnetin	Microtubule-associated protein tau	MAPT
C57	isorhamnetin	Mitogen-activated protein kinase 14	MAPK14
C57	isorhamnetin	mRNA of Protein-tyrosine phosphatase, non-receptor type 1	PTPN1
C57	isorhamnetin	Multidrug resistance protein 1	ABCB1
C57	isorhamnetin	Multidrug resistance-associated protein 1	ABCC1
C57	isorhamnetin	Myeloperoxidase	MPO
C57	isorhamnetin	NADPH oxidase 4	NOX4
C57	isorhamnetin	Neutrophil cytosol factor 1	NCF1
C57	isorhamnetin	Nitric oxide synthase, inducible	NOS2
C57	isorhamnetin	Nitric-oxide synthase, endothelial	NOS3
C57	isorhamnetin	NUAK family SNF1-like kinase 1	NUAK1
C57	isorhamnetin	Nuclear receptor coactivator 1	NCOA1
C57	isorhamnetin	Nuclear receptor coactivator 2	NCOA2
C57	isorhamnetin	Oxidized low-density lipoprotein receptor 1	OLR1
C57	isorhamnetin	Peroxisome proliferator activated receptor delta	PPARD
C57	isorhamnetin	Peroxisome proliferator activated receptor gamma	PPARG
C57	isorhamnetin	Phosphatidylinositol-4,5-bisphosphate 3-kinase catalytic subunit, gamma isoform	PIK3CG
C57	isorhamnetin	Prostaglandin G/H synthase 1	PTGS1
C57	isorhamnetin	Prostaglandin G/H synthase 2	PTGS2
C57	isorhamnetin	Proto-oncogene serine/threonine-protein kinase Pim-1	PIM1
C57	isorhamnetin	Serine/threonine-protein kinase Chk1	CHEK1
C57	isorhamnetin	Serine/threonine-protein kinase N1	PKN1
C57	isorhamnetin	Serine/threonine-protein kinase Nek6	NEK6
C57	isorhamnetin	Steroid hormone receptor ERR1	ESRRA
C57	isorhamnetin	Transcription factor p65	RELA
C57	isorhamnetin	Trypsin-1	PRSS1
C57	isorhamnetin	Tyrosinase	TYR
C57	isorhamnetin	Xanthine dehydrogenase/oxidase	XDH
C58	Isotrifoliol	Androgen receptor	AR
C58	Isotrifoliol	Cyclin-A2	CCNA2
C58	Isotrifoliol	Estrogen receptor	ESR1
C58	Isotrifoliol	Estrogen receptor beta	ESR2
C58	Isotrifoliol	Glycogen synthase kinase-3 beta	GSK3B
C58	Isotrifoliol	Mitogen-activated protein kinase 14	MAPK14
C58	Isotrifoliol	Nitric oxide synthase, inducible	NOS2
C58	Isotrifoliol	Phosphatidylinositol-4,5-bisphosphate 3-kinase catalytic subunit, gamma isoform	PIK3CG
C58	Isotrifoliol	Prostaglandin G/H synthase 2	PTGS2
C58	Isotrifoliol	Proto-oncogene serine/threonine-protein kinase Pim-1	PIM1
C58	Isotrifoliol	Serine/threonine-protein kinase Chk1	CHEK1
C59	Jaranol	Aldose reductase	AKR1B1
C59	Jaranol	Amine oxidase [flavin-containing] A	MAOA
C59	Jaranol	Androgen receptor	AR
C59	Jaranol	ATP-binding cassette sub-family G member 2	ABCG2
C59	Jaranol	Calmodulin-1	CALM1
C59	Jaranol	Cytochrome P450 1B1	CYP1B1
C59	Jaranol	Dipeptidyl peptidase IV	DPP4
C59	Jaranol	Estrogen receptor beta	ESR2
C59	Jaranol	Multidrug resistance protein 1	ABCB1
C59	Jaranol	NADPH oxidase 4	NOX4
C59	Jaranol	Nitric oxide synthase, inducible	NOS2
C59	Jaranol	Nuclear receptor coactivator 2	NCOA2
C59	Jaranol	Prostaglandin G/H synthase 1	PTGS1
C59	Jaranol	Prostaglandin G/H synthase 2	PTGS2
C59	Jaranol	Serine/threonine-protein kinase Chk1	CHEK1
C59	Jaranol	Sodium channel protein type 5 subunit alpha	SCN5A
C59	Jaranol	Trypsin-1	PRSS1
C59	Jaranol	Xanthine dehydrogenase/oxidase	XDH
C60	Kanzonol F	Androgen receptor	AR
C60	Kanzonol F	Calmodulin-1	CALM1
C60	Kanzonol F	Coagulation factor Xa	F10
C60	Kanzonol F	Estrogen receptor	ESR1
C60	Kanzonol F	Estrogen receptor beta	ESR2
C60	Kanzonol F	Nuclear receptor coactivator 2	NCOA2
C60	Kanzonol F	Prostaglandin G/H synthase 2	PTGS2
C60	Kanzonol F	Proto-oncogene serine/threonine-protein kinase Pim-1	PIM1
C61	kanzonols W	Androgen receptor	AR
C61	kanzonols W	Calmodulin-1	CALM1
C61	kanzonols W	Coagulation factor Xa	F10
C61	kanzonols W	Cyclin-A2	CCNA2
C61	kanzonols W	Estrogen receptor	ESR1
C61	kanzonols W	Estrogen receptor beta	ESR2
C61	kanzonols W	Glycogen synthase kinase-3 beta	GSK3B
C61	kanzonols W	Mitogen-activated protein kinase 14	MAPK14
C61	kanzonols W	Nitric oxide synthase, inducible	NOS2
C61	kanzonols W	Nuclear receptor coactivator 1	NCOA1
C61	kanzonols W	Nuclear receptor coactivator 2	NCOA2
C61	kanzonols W	Peroxisome proliferator activated receptor gamma	PPARG
C61	kanzonols W	Prostaglandin G/H synthase 1	PTGS1
C61	kanzonols W	Prostaglandin G/H synthase 2	PTGS2
C61	kanzonols W	Proto-oncogene serine/threonine-protein kinase Pim-1	PIM1
C61	kanzonols W	Retinoic acid receptor RXR-alpha	RXRA
C61	kanzonols W	Serine/threonine-protein kinase Chk1	CHEK1
C61	kanzonols W	Sodium channel protein type 5 subunit alpha	SCN5A
C61	kanzonols W	Trypsin-1	PRSS1
C62	Licoagrocarpin	Acetylcholinesterase	ACHE
C62	Licoagrocarpin	Alpha-1B adrenergic receptor	ADRA1B
C62	Licoagrocarpin	Androgen receptor	AR
C62	Licoagrocarpin	Beta-2 adrenergic receptor	ADRB2
C62	Licoagrocarpin	Calmodulin-1	CALM1
C62	Licoagrocarpin	Coagulation factor Xa	F10
C62	Licoagrocarpin	Cyclin-A2	CCNA2
C62	Licoagrocarpin	Estrogen receptor	ESR1
C62	Licoagrocarpin	Estrogen receptor beta	ESR2
C62	Licoagrocarpin	Glycogen synthase kinase-3 beta	GSK3B
C62	Licoagrocarpin	Mitogen-activated protein kinase 14	MAPK14
C62	Licoagrocarpin	Muscarinic acetylcholine receptor M1	CHRM1
C62	Licoagrocarpin	Muscarinic acetylcholine receptor M3	CHRM3
C62	Licoagrocarpin	Muscarinic acetylcholine receptor M5	CHRM5
C62	Licoagrocarpin	Nitric oxide synthase, inducible	NOS2
C62	Licoagrocarpin	Nitric-oxide synthase, endothelial	NOS3
C62	Licoagrocarpin	Nuclear receptor coactivator 2	NCOA2
C62	Licoagrocarpin	Peroxisome proliferator activated receptor gamma	PPARG
C62	Licoagrocarpin	Potassium voltage-gated channel subfamily H member 2	KCNH2
C62	Licoagrocarpin	Prostaglandin G/H synthase 1	PTGS1
C62	Licoagrocarpin	Prostaglandin G/H synthase 2	PTGS2
C62	Licoagrocarpin	Proto-oncogene serine/threonine-protein kinase Pim-1	PIM1
C62	Licoagrocarpin	Retinoic acid receptor RXR-alpha	RXRA
C62	Licoagrocarpin	Retinoic acid receptor RXR-beta	RXRB
C62	Licoagrocarpin	Sodium channel protein type 5 subunit alpha	SCN5A
C62	Licoagrocarpin	Trypsin-1	PRSS1
C62	Licoagrocarpin	Tyrosine-protein phosphatase non-receptor type 1	PTPN1
C63	Licoagroisoflavone	Androgen receptor	AR
C63	Licoagroisoflavone	Calmodulin-1	CALM1
C63	Licoagroisoflavone	Coagulation factor Xa	F10
C63	Licoagroisoflavone	Cyclin-A2	CCNA2
C63	Licoagroisoflavone	Dipeptidyl peptidase IV	DPP4
C63	Licoagroisoflavone	Estrogen receptor	ESR1
C63	Licoagroisoflavone	Estrogen receptor beta	ESR2
C63	Licoagroisoflavone	Glycogen synthase kinase-3 beta	GSK3B
C63	Licoagroisoflavone	Mitogen-activated protein kinase 14	MAPK14
C63	Licoagroisoflavone	Nitric oxide synthase, inducible	NOS2
C63	Licoagroisoflavone	Peroxisome proliferator activated receptor gamma	PPARG
C63	Licoagroisoflavone	Prostaglandin G/H synthase 2	PTGS2
C63	Licoagroisoflavone	Proto-oncogene serine/threonine-protein kinase Pim-1	PIM1
C63	Licoagroisoflavone	Serine/threonine-protein kinase Chk1	CHEK1
C63	Licoagroisoflavone	Sodium channel protein type 5 subunit alpha	SCN5A
C63	Licoagroisoflavone	Trypsin-1	PRSS1
C64	licochalcone a	Alpha-1B adrenergic receptor	ADRA1B
C64	licochalcone a	Androgen receptor	AR
C64	licochalcone a	Apoptosis regulator Bcl-2	BCL2
C64	licochalcone a	Beta-2 adrenergic receptor	ADRB2
C64	licochalcone a	Calmodulin-1	CALM1
C64	licochalcone a	Carbonic anhydrase II	CA2
C64	licochalcone a	Coagulation factor Xa	F10
C64	licochalcone a	Cyclin-A2	CCNA2
C64	licochalcone a	Estrogen receptor	ESR1
C64	licochalcone a	Estrogen receptor beta	ESR2
C64	licochalcone a	Eukaryotic translation initiation factor 6	EIF6
C64	licochalcone a	Fos-related antigen 2	FOSL2
C64	licochalcone a	G1/S-specific cyclin-D1	CCND1
C64	licochalcone a	Glycogen synthase kinase-3 beta	GSK3B
C64	licochalcone a	Mitogen-activated protein kinase 1	MAPK1
C64	licochalcone a	Mitogen-activated protein kinase 14	MAPK14
C64	licochalcone a	Muscarinic acetylcholine receptor M1	CHRM1
C64	licochalcone a	Nitric oxide synthase, inducible	NOS2
C64	licochalcone a	Nuclear receptor coactivator 2	NCOA2
C64	licochalcone a	Peroxisome proliferator activated receptor gamma	PPARG
C64	licochalcone a	Prostaglandin G/H synthase 1	PTGS1
C64	licochalcone a	Prostaglandin G/H synthase 2	PTGS2
C64	licochalcone a	Proto-oncogene serine/threonine-protein kinase Pim-1	PIM1
C64	licochalcone a	Serine/threonine-protein kinase Chk1	CHEK1
C64	licochalcone a	Signal transducer and activator of transcription 3	STAT3
C64	licochalcone a	Sodium channel protein type 5 subunit alpha	SCN5A
C64	licochalcone a	Sodium-dependent dopamine transporter	SLC6A3
C64	licochalcone a	Transcription factor p65	RELA
C65	licochalcone G	Androgen receptor	AR
C65	licochalcone G	Calmodulin-1	CALM1
C65	licochalcone G	Coagulation factor Xa	F10
C65	licochalcone G	Cyclin-A2	CCNA2
C65	licochalcone G	Estrogen receptor	ESR1
C65	licochalcone G	Estrogen receptor beta	ESR2
C65	licochalcone G	Glycogen synthase kinase-3 beta	GSK3B
C65	licochalcone G	Mitogen-activated protein kinase 14	MAPK14
C65	licochalcone G	Nitric oxide synthase, inducible	NOS2
C65	licochalcone G	Nuclear receptor coactivator 2	NCOA2
C65	licochalcone G	Peroxisome proliferator activated receptor gamma	PPARG
C65	licochalcone G	Prostaglandin G/H synthase 2	PTGS2
C65	licochalcone G	Proto-oncogene serine/threonine-protein kinase Pim-1	PIM1
C65	licochalcone G	Vascular endothelial growth factor receptor 2	KDR
C66	Licocoumarone	Androgen receptor	AR
C66	Licocoumarone	Cyclin-A2	CCNA2
C66	Licocoumarone	Estrogen receptor	ESR1
C66	Licocoumarone	Estrogen receptor beta	ESR2
C66	Licocoumarone	Glycogen synthase kinase-3 beta	GSK3B
C67	licoisoflavanone	Acetylcholinesterase	ACHE
C67	licoisoflavanone	Androgen receptor	AR
C67	licoisoflavanone	Calmodulin-1	CALM1
C67	licoisoflavanone	Coagulation factor VII	F7
C67	licoisoflavanone	Coagulation factor Xa	F10
C67	licoisoflavanone	Cyclin-A2	CCNA2
C67	licoisoflavanone	Estrogen receptor	ESR1
C67	licoisoflavanone	Estrogen receptor beta	ESR2
C67	licoisoflavanone	Glycogen synthase kinase-3 beta	GSK3B
C67	licoisoflavanone	Nitric oxide synthase, inducible	NOS2
C67	licoisoflavanone	Nuclear receptor coactivator 1	NCOA1
C67	licoisoflavanone	Peroxisome proliferator activated receptor gamma	PPARG
C67	licoisoflavanone	Prostaglandin G/H synthase 1	PTGS1
C67	licoisoflavanone	Prostaglandin G/H synthase 2	PTGS2
C67	licoisoflavanone	Proto-oncogene serine/threonine-protein kinase Pim-1	PIM1
C67	licoisoflavanone	Sodium channel protein type 5 subunit alpha	SCN5A
C67	licoisoflavanone	Trypsin-1	PRSS1
C68	Licoisoflavone	Androgen receptor	AR
C68	Licoisoflavone	Calmodulin-1	CALM1
C68	Licoisoflavone	Coagulation factor Xa	F10
C68	Licoisoflavone	Cyclin-A2	CCNA2
C68	Licoisoflavone	Dipeptidyl peptidase IV	DPP4
C68	Licoisoflavone	Estrogen receptor	ESR1
C68	Licoisoflavone	Mitogen-activated protein kinase 14	MAPK14
C68	Licoisoflavone	Nitric oxide synthase, inducible	NOS2
C68	Licoisoflavone	Nuclear receptor coactivator 2	NCOA2
C68	Licoisoflavone	Peroxisome proliferator activated receptor gamma	PPARG
C68	Licoisoflavone	Prostaglandin G/H synthase 2	PTGS2
C68	Licoisoflavone	Proto-oncogene serine/threonine-protein kinase Pim-1	PIM1
C68	Licoisoflavone	Serine/threonine-protein kinase Chk1	CHEK1
C68	Licoisoflavone	Trypsin-1	PRSS1
C68	Licoisoflavone	Tyrosine-protein phosphatase non-receptor type 1	PTPN1
C68	Licoisoflavone	Vascular endothelial growth factor receptor 2	KDR
C69	Licoisoflavone B	Acetylcholinesterase	ACHE
C69	Licoisoflavone B	Androgen receptor	AR
C69	Licoisoflavone B	Calmodulin-1	CALM1
C69	Licoisoflavone B	Coagulation factor Xa	F10
C69	Licoisoflavone B	Cyclin-A2	CCNA2
C69	Licoisoflavone B	Estrogen receptor	ESR1
C69	Licoisoflavone B	Estrogen receptor beta	ESR2
C69	Licoisoflavone B	Glycogen synthase kinase-3 beta	GSK3B
C69	Licoisoflavone B	Nitric oxide synthase, inducible	NOS2
C69	Licoisoflavone B	Peroxisome proliferator activated receptor gamma	PPARG
C69	Licoisoflavone B	Prostaglandin G/H synthase 2	PTGS2
C69	Licoisoflavone B	Proto-oncogene serine/threonine-protein kinase Pim-1	PIM1
C69	Licoisoflavone B	Serine/threonine-protein kinase Chk1	CHEK1
C69	Licoisoflavone B	Trypsin-1	PRSS1
C70	Licoricone	Androgen receptor	AR
C70	Licoricone	Calmodulin-1	CALM1
C70	Licoricone	Coagulation factor Xa	F10
C70	Licoricone	Estrogen receptor	ESR1
C70	Licoricone	Nitric oxide synthase, inducible	NOS2
C70	Licoricone	Nuclear receptor coactivator 2	NCOA2
C70	Licoricone	Peroxisome proliferator activated receptor gamma	PPARG
C70	Licoricone	Potassium voltage-gated channel subfamily H member 2	KCNH2
C70	Licoricone	Prostaglandin G/H synthase 2	PTGS2
C70	Licoricone	Proto-oncogene serine/threonine-protein kinase Pim-1	PIM1
C70	Licoricone	Serine/threonine-protein kinase Chk1	CHEK1
C70	Licoricone	Trypsin-1	PRSS1
C70	Licoricone	Vascular endothelial growth factor receptor 2	KDR
C71	Lupiwighteone	Androgen receptor	AR
C71	Lupiwighteone	Calmodulin-1	CALM1
C71	Lupiwighteone	Coagulation factor Xa	F10
C71	Lupiwighteone	Cyclin-A2	CCNA2
C71	Lupiwighteone	Dipeptidyl peptidase IV	DPP4
C71	Lupiwighteone	Estrogen receptor	ESR1
C71	Lupiwighteone	Estrogen receptor beta	ESR2
C71	Lupiwighteone	Glycogen synthase kinase-3 beta	GSK3B
C71	Lupiwighteone	Mitogen-activated protein kinase 14	MAPK14
C71	Lupiwighteone	Nitric oxide synthase, inducible	NOS2
C71	Lupiwighteone	Nuclear receptor coactivator 2	NCOA2
C71	Lupiwighteone	Peroxisome proliferator activated receptor gamma	PPARG
C71	Lupiwighteone	Prostaglandin G/H synthase 2	PTGS2
C71	Lupiwighteone	Proto-oncogene serine/threonine-protein kinase Pim-1	PIM1
C71	Lupiwighteone	Serine/threonine-protein kinase Chk1	CHEK1
C71	Lupiwighteone	Sodium channel protein type 5 subunit alpha	SCN5A
C71	Lupiwighteone	Trypsin-1	PRSS1
C71	Lupiwighteone	Tyrosine-protein phosphatase non-receptor type 1	PTPN1
C72	Mairin	Aldo-keto reductase family 1 member B10	AKR1B10
C72	Mairin	G-protein coupled bile acid receptor 1	GPBAR1
C72	Mairin	Progesterone receptor	PGR
C72	Mairin	SUMO-activating enzyme subunit 1	SAE1
C72	Mairin	SUMO-activating enzyme subunit 2	UBA2
C72	Mairin	Tissue factor	F3
C73	Medicarpin	5-hydroxytryptamine 2A receptor	HTR2A
C73	Medicarpin	Alpha-1A adrenergic receptor	ADRA1A
C73	Medicarpin	Alpha-1B adrenergic receptor	ADRA1B
C73	Medicarpin	Alpha-1D adrenergic receptor	ADRA1D
C73	Medicarpin	Beta-2 adrenergic receptor	ADRB2
C73	Medicarpin	Calmodulin-1	CALM1
C73	Medicarpin	CGMP-inhibited 3',5'-cyclic phosphodiesterase A	PDE3A
C73	Medicarpin	Cyclin-A2	CCNA2
C73	Medicarpin	Delta-type opioid receptor	OPRD1
C73	Medicarpin	Dipeptidyl peptidase IV	DPP4
C73	Medicarpin	Dopamine D1 receptor	DRD1
C73	Medicarpin	Estrogen receptor	ESR1
C73	Medicarpin	Estrogen receptor beta	ESR2
C73	Medicarpin	Mitogen-activated protein kinase 10	MAPK10
C73	Medicarpin	Muscarinic acetylcholine receptor M1	CHRM1
C73	Medicarpin	Muscarinic acetylcholine receptor M2	CHRM2
C73	Medicarpin	Muscarinic acetylcholine receptor M3	CHRM3
C73	Medicarpin	Muscarinic acetylcholine receptor M4	CHRM4
C73	Medicarpin	Muscarinic acetylcholine receptor M5	CHRM5
C73	Medicarpin	Mu-type opioid receptor	OPRM1
C73	Medicarpin	Neuronal acetylcholine receptor protein, alpha-7 chain	CHRNA7
C73	Medicarpin	Nitric oxide synthase, inducible	NOS2
C73	Medicarpin	Phosphatidylinositol-4,5-bisphosphate 3-kinase catalytic subunit, gamma isoform	PIK3CG
C73	Medicarpin	Prostaglandin G/H synthase 1	PTGS1
C73	Medicarpin	Prostaglandin G/H synthase 2	PTGS2
C73	Medicarpin	Proto-oncogene serine/threonine-protein kinase Pim-1	PIM1
C73	Medicarpin	Retinoic acid receptor RXR-alpha	RXRA
C73	Medicarpin	Sodium channel protein type 5 subunit alpha	SCN5A
C73	Medicarpin	Sodium-dependent dopamine transporter	SLC6A3
C73	Medicarpin	Sodium-dependent serotonin transporter	SLC6A4
C73	Medicarpin	Trypsin-1	PRSS1
C74	Odoratin	Androgen receptor	AR
C74	Odoratin	Calmodulin-1	CALM1
C74	Odoratin	Cyclin-A2	CCNA2
C74	Odoratin	Dipeptidyl peptidase IV	DPP4
C74	Odoratin	Estrogen receptor	ESR1
C74	Odoratin	Estrogen receptor beta	ESR2
C74	Odoratin	Glycogen synthase kinase-3 beta	GSK3B
C74	Odoratin	Kallikrein-7	KLK7
C74	Odoratin	Mitogen-activated protein kinase 14	MAPK14
C74	Odoratin	Nitric oxide synthase, inducible	NOS2
C74	Odoratin	Nuclear receptor coactivator 2	NCOA2
C74	Odoratin	Peroxisome proliferator activated receptor gamma	PPARG
C74	Odoratin	Peroxisome proliferator-activated receptor gamma	PPARG
C74	Odoratin	Prostaglandin G/H synthase 1	PTGS1
C74	Odoratin	Prostaglandin G/H synthase 2	PTGS2
C74	Odoratin	Proto-oncogene serine/threonine-protein kinase Pim-1	PIM1
C74	Odoratin	Retinoic acid receptor RXR-alpha	RXRA
C74	Odoratin	Serine/threonine-protein kinase Chk1	CHEK1
C74	Odoratin	Sodium channel protein type 5 subunit alpha	SCN5A
C74	Odoratin	Trypsin-1	PRSS1
C75	Panaxadiol	Glucocorticoid receptor	NR3C1
C76	Phaseol	Androgen receptor	AR
C76	Phaseol	Cyclin-A2	CCNA2
C76	Phaseol	Estrogen receptor	ESR1
C76	Phaseol	Glycogen synthase kinase-3 beta	GSK3B
C76	Phaseol	Mitogen-activated protein kinase 14	MAPK14
C76	Phaseol	Peroxisome proliferator activated receptor gamma	PPARG
C76	Phaseol	Prostaglandin G/H synthase 2	PTGS2
C76	Phaseol	Proto-oncogene serine/threonine-protein kinase Pim-1	PIM1
C76	Phaseol	Serine/threonine-protein kinase Chk1	CHEK1
C76	Phaseol	Vascular endothelial growth factor receptor 2	KDR
C77	Phaseolinisoflavan	Acetylcholinesterase	ACHE
C77	Phaseolinisoflavan	Alpha-1B adrenergic receptor	ADRA1B
C77	Phaseolinisoflavan	Androgen receptor	AR
C77	Phaseolinisoflavan	Beta-2 adrenergic receptor	ADRB2
C77	Phaseolinisoflavan	Calmodulin-1	CALM1
C77	Phaseolinisoflavan	Coagulation factor Xa	F10
C77	Phaseolinisoflavan	Cyclin-A2	CCNA2
C77	Phaseolinisoflavan	Estrogen receptor	ESR1
C77	Phaseolinisoflavan	Estrogen receptor beta	ESR2
C77	Phaseolinisoflavan	Glycogen synthase kinase-3 beta	GSK3B
C77	Phaseolinisoflavan	Mitogen-activated protein kinase 14	MAPK14
C77	Phaseolinisoflavan	Muscarinic acetylcholine receptor M1	CHRM1
C77	Phaseolinisoflavan	Nitric oxide synthase, inducible	NOS2
C77	Phaseolinisoflavan	Nuclear receptor coactivator 1	NCOA1
C77	Phaseolinisoflavan	Peroxisome proliferator activated receptor gamma	PPARG
C77	Phaseolinisoflavan	Prostaglandin G/H synthase 2	PTGS2
C77	Phaseolinisoflavan	Proto-oncogene serine/threonine-protein kinase Pim-1	PIM1
C77	Phaseolinisoflavan	Retinoic acid receptor RXR-alpha	RXRA
C77	Phaseolinisoflavan	Serine/threonine-protein kinase Chk1	CHEK1
C77	Phaseolinisoflavan	Sodium channel protein type 5 subunit alpha	SCN5A
C77	Phaseolinisoflavan	Trypsin-1	PRSS1
C77	Phaseolinisoflavan	Tyrosinase	TYR
C78	phytosterol	NPC1-like intracellular cholesterol transporter 1	NPC1L1
C78	phytosterol	Nuclear receptor ROR-gamma	RORC
C78	phytosterol	Oxysterols receptor LXR-alpha	NR1H3
C78	phytosterol	Oxysterols receptor LXR-beta	NR1H2
C78	phytosterol	Progesterone receptor	PGR
C78	phytosterol	Steroid 17-alpha-hydroxylase/17,20 lyase	CYP17A1
C78	phytosterol	Sterol regulatory element-binding protein 2	SREBF2
C79	Polygalacic acid	CD81 antigen	CD81
C79	Polygalacic acid	Tissue factor	F3
C80	sanjoinenine	Coagulation factor Xa	F10
C80	sanjoinenine	Prostaglandin G/H synthase 2	PTGS2
C81	shinpterocarpin	5-hydroxytryptamine receptor 3A	HTR3A
C81	shinpterocarpin	Alpha-1B adrenergic receptor	ADRA1B
C81	shinpterocarpin	Alpha-1D adrenergic receptor	ADRA1D
C81	shinpterocarpin	Androgen receptor	AR
C81	shinpterocarpin	Beta-2 adrenergic receptor	ADRB2
C81	shinpterocarpin	Calmodulin-1	CALM1
C81	shinpterocarpin	Cyclin-A2	CCNA2
C81	shinpterocarpin	Delta-type opioid receptor	OPRD1
C81	shinpterocarpin	Estrogen receptor	ESR1
C81	shinpterocarpin	Estrogen receptor beta	ESR2
C81	shinpterocarpin	Glycogen synthase kinase-3 beta	GSK3B
C81	shinpterocarpin	Mitogen-activated protein kinase 14	MAPK14
C81	shinpterocarpin	Muscarinic acetylcholine receptor M1	CHRM1
C81	shinpterocarpin	Muscarinic acetylcholine receptor M3	CHRM3
C81	shinpterocarpin	Mu-type opioid receptor	OPRM1
C81	shinpterocarpin	Neuronal acetylcholine receptor protein, alpha-7 chain	CHRNA7
C81	shinpterocarpin	Nitric oxide synthase, inducible	NOS2
C81	shinpterocarpin	Nuclear receptor coactivator 1	NCOA1
C81	shinpterocarpin	Peroxisome proliferator activated receptor gamma	PPARG
C81	shinpterocarpin	Phosphatidylinositol-4,5-bisphosphate 3-kinase catalytic subunit, gamma isoform	PIK3CG
C81	shinpterocarpin	Potassium voltage-gated channel subfamily H member 2	KCNH2
C81	shinpterocarpin	Prostaglandin G/H synthase 1	PTGS1
C81	shinpterocarpin	Prostaglandin G/H synthase 2	PTGS2
C81	shinpterocarpin	Proto-oncogene serine/threonine-protein kinase Pim-1	PIM1
C81	shinpterocarpin	Retinoic acid receptor RXR-alpha	RXRA
C81	shinpterocarpin	Retinoic acid receptor RXR-beta	RXRB
C81	shinpterocarpin	Sodium channel protein type 5 subunit alpha	SCN5A
C81	shinpterocarpin	Trypsin-1	PRSS1
C82	sitosterol	Mineralocorticoid receptor	NR3C2
C82	sitosterol	NPC1-like intracellular cholesterol transporter 1	NPC1L1
C82	sitosterol	Nuclear receptor coactivator 2	NCOA2
C82	sitosterol	Nuclear receptor ROR-gamma	RORC
C82	sitosterol	Oxysterols receptor LXR-alpha	NR1H3
C82	sitosterol	Oxysterols receptor LXR-beta	NR1H2
C82	sitosterol	Progesterone receptor	PGR
C82	sitosterol	Steroid 17-alpha-hydroxylase/17,20 lyase	CYP17A1
C82	sitosterol	Sterol regulatory element-binding protein 2	SREBF2
C83	Stigmasterol	5-hydroxytryptamine 2A receptor	HTR2A
C83	Stigmasterol	Alcohol dehydrogenase 1C	ADH1C
C83	Stigmasterol	Alpha-1A adrenergic receptor	ADRA1A
C83	Stigmasterol	Alpha-1B adrenergic receptor	ADRA1B
C83	Stigmasterol	Alpha-2A adrenergic receptor	ADRA2A
C83	Stigmasterol	Amine oxidase [flavin-containing] A	MAOA
C83	Stigmasterol	Amine oxidase [flavin-containing] B	MAOB
C83	Stigmasterol	Beta-1 adrenergic receptor	ADRB1
C83	Stigmasterol	Beta-2 adrenergic receptor	ADRB2
C83	Stigmasterol	Chymotrypsinogen B	CTRB1
C83	Stigmasterol	DNA polymerase alpha catalytic subunit	POLA1
C83	Stigmasterol	Gamma-aminobutyric acid receptor subunit alpha-1	GABRA1
C83	Stigmasterol	Gamma-aminobutyric-acid receptor alpha-3 subunit	GABRA2
C83	Stigmasterol	Leukotriene A-4 hydrolase	LTA4H
C83	Stigmasterol	Mineralocorticoid receptor	NR3C2
C83	Stigmasterol	Muscarinic acetylcholine receptor M1	CHRM1
C83	Stigmasterol	Muscarinic acetylcholine receptor M2	CHRM2
C83	Stigmasterol	Muscarinic acetylcholine receptor M3	CHRM3
C83	Stigmasterol	Neuronal acetylcholine receptor protein, alpha-7 chain	CHRNA7
C83	Stigmasterol	NPC1-like intracellular cholesterol transporter 1	NPC1L1
C83	Stigmasterol	Nuclear receptor coactivator 1	NCOA1
C83	Stigmasterol	Nuclear receptor coactivator 2	NCOA2
C83	Stigmasterol	Oxysterols receptor LXR-alpha	NR1H3
C83	Stigmasterol	Oxysterols receptor LXR-beta	NR1H2
C83	Stigmasterol	Progesterone receptor	PGR
C83	Stigmasterol	Prostaglandin G/H synthase 1	PTGS1
C83	Stigmasterol	Prostaglandin G/H synthase 2	PTGS2
C83	Stigmasterol	Retinoic acid receptor RXR-alpha	RXRA
C83	Stigmasterol	Sodium channel protein type 5 subunit alpha	SCN5A
C83	Stigmasterol	Sodium channel protein type 5 subunit alpha	SCN5A
C83	Stigmasterol	Sodium-dependent dopamine transporter	SLC6A3
C83	Stigmasterol	Sodium-dependent noradrenaline transporter	SLC6A2
C83	Stigmasterol	Steroid 17-alpha-hydroxylase/17,20 lyase	CYP17A1
C83	Stigmasterol	Urokinase-type plasminogen activator	PLAU
C84	suchilactone	Alpha-1D adrenergic receptor	ADRA1D
C84	suchilactone	Beta-2 adrenergic receptor	ADRB2
C84	suchilactone	Calcium-activated potassium channel subunit alpha 1	KCNMA1
C84	suchilactone	Calmodulin-1	CALM1
C84	suchilactone	CGMP-inhibited 3',5'-cyclic phosphodiesterase A	PDE3A
C84	suchilactone	Coagulation factor VII	F7
C84	suchilactone	Coagulation factor Xa	F10
C84	suchilactone	mRNA of Protein-tyrosine phosphatase, non-receptor type 1	PTPN1
C84	suchilactone	Nuclear receptor coactivator 1	NCOA1
C84	suchilactone	Potassium voltage-gated channel subfamily H member 2	KCNH2
C84	suchilactone	Prostaglandin G/H synthase 1	PTGS1
C84	suchilactone	Prostaglandin G/H synthase 2	PTGS2
C84	suchilactone	Retinoic acid receptor RXR-alpha	RXRA
C84	suchilactone	Sodium channel protein type 5 subunit alpha	SCN5A
C85	Vestitol	5-hydroxytryptamine 2A receptor	HTR2A
C85	Vestitol	Alpha-1A adrenergic receptor	ADRA1A
C85	Vestitol	Alpha-1B adrenergic receptor	ADRA1B
C85	Vestitol	Androgen receptor	AR
C85	Vestitol	Beta-2 adrenergic receptor	ADRB2
C85	Vestitol	Calmodulin-1	CALM1
C85	Vestitol	cAMP-dependent protein kinase inhibitor alpha	PKIA
C85	Vestitol	CGMP-inhibited 3',5'-cyclic phosphodiesterase A	PDE3A
C85	Vestitol	Cyclin-A2	CCNA2
C85	Vestitol	Dipeptidyl peptidase IV	DPP4
C85	Vestitol	Estrogen receptor	ESR1
C85	Vestitol	Estrogen receptor beta	ESR2
C85	Vestitol	Glycogen synthase kinase-3 beta	GSK3B
C85	Vestitol	Mitogen-activated protein kinase 14	MAPK14
C85	Vestitol	Muscarinic acetylcholine receptor M1	CHRM1
C85	Vestitol	Muscarinic acetylcholine receptor M4	CHRM4
C85	Vestitol	Nitric oxide synthase, inducible	NOS2
C85	Vestitol	Peroxisome proliferator activated receptor gamma	PPARG
C85	Vestitol	Prostaglandin G/H synthase 1	PTGS1
C85	Vestitol	Prostaglandin G/H synthase 2	PTGS2
C85	Vestitol	Proto-oncogene serine/threonine-protein kinase Pim-1	PIM1
C85	Vestitol	Retinoic acid receptor RXR-alpha	RXRA
C85	Vestitol	Serine/threonine-protein kinase Chk1	CHEK1
C85	Vestitol	Sodium channel protein type 5 subunit alpha	SCN5A
C85	Vestitol	Sodium-dependent dopamine transporter	SLC6A3
C85	Vestitol	Sodium-dependent serotonin transporter	SLC6A4
C85	Vestitol	Trypsin-1	PRSS1
C86	Xambioona	Calmodulin-1	CALM1
C86	Xambioona	Coagulation factor Xa	F10
C86	Xambioona	Estrogen receptor	ESR1
C86	Xambioona	Estrogen receptor beta	ESR2
C86	Xambioona	Nitric oxide synthase, inducible	NOS2
C86	Xambioona	Nuclear receptor coactivator 2	NCOA2
C86	Xambioona	Prostaglandin G/H synthase 2	PTGS2
C86	Xambioona	Proto-oncogene serine/threonine-protein kinase Pim-1	PIM1
C87	zizyphusine	Acetylcholinesterase	ACHE
C87	zizyphusine	Androgen receptor	AR
C87	zizyphusine	Calcium-activated potassium channel subunit alpha 1	KCNMA1
C87	zizyphusine	Calmodulin-1	CALM1
C87	zizyphusine	Muscarinic acetylcholine receptor M1	CHRM1
C87	zizyphusine	Muscarinic acetylcholine receptor M3	CHRM3
C87	zizyphusine	Nuclear receptor coactivator 1	NCOA1
C87	zizyphusine	Prostaglandin G/H synthase 1	PTGS1
C87	zizyphusine	Prostaglandin G/H synthase 2	PTGS2
C87	zizyphusine	Retinoic acid receptor RXR-alpha	RXRA
C87	zizyphusine	Sodium channel protein type 5 subunit alpha	SCN5A
