# Supplementary material for: Qi Fu Yin ameliorates neuroinflammation through inhibiting RAGE and TLR4/NF-κB pathway in AD model rats
Source: Aging (Albany NY). 2023 Nov 22;15(22):13239–64. doi: 10.18632/aging.205238 (PMC10713403; doi:10.18632/aging.205238)
Supplement: Supplementary Table 2 [file aging-15-205238-s003.xlsx]

## Sheet: Sheet1
Supplementary Table 2. Information on the target-Alzheimer’s disease (AD) interactions.
No.	Molecule Name	Target	Gene
C1	(2R)-7-hydroxy-2-(4-hydroxyphenyl)chroman-11-one	Phosphatidylinositol-4,5-bisphosphate 3-kinase catalytic subunit, gamma isoform	PIK3CG
C1	(2R)-7-hydroxy-2-(4-hydroxyphenyl)chroman-13-one	Amine oxidase [flavin-containing] B	MAOB
C1	(2R)-7-hydroxy-2-(4-hydroxyphenyl)chroman-16-one	Calmodulin-1	CALM1
C1	(2R)-7-hydroxy-2-(4-hydroxyphenyl)chroman-18-one	Sodium-dependent serotonin transporter	SLC6A4
C1	(2R)-7-hydroxy-2-(4-hydroxyphenyl)chroman-4-one	Amine oxidase [flavin-containing] B	MAOB
C1	(2R)-7-hydroxy-2-(4-hydroxyphenyl)chroman-4-one	Aromatase	CYP19A1
C1	(2R)-7-hydroxy-2-(4-hydroxyphenyl)chroman-4-one	Prostaglandin G/H synthase 1	PTGS1
C1	(2R)-7-hydroxy-2-(4-hydroxyphenyl)chroman-5-one	Estrogen receptor	ESR1
C1	(2R)-7-hydroxy-2-(4-hydroxyphenyl)chroman-6-one	Prostaglandin G/H synthase 2	PTGS2
C1	(2R)-7-hydroxy-2-(4-hydroxyphenyl)chroman-7-one	Retinoic acid receptor RXR-alpha	RXRA
C1	(2R)-7-hydroxy-2-(4-hydroxyphenyl)chroman-9-one	Beta-2 adrenergic receptor	ADRB2
C2	(2S)-7-hydroxy-2-(4-hydroxyphenyl)-8-(3-methylbut-2-enyl)chroman-12-one	Beta-2 adrenergic receptor	ADRB2
C2	(2S)-7-hydroxy-2-(4-hydroxyphenyl)-8-(3-methylbut-2-enyl)chroman-13-one	Estrogen receptor beta	ESR2
C2	(2S)-7-hydroxy-2-(4-hydroxyphenyl)-8-(3-methylbut-2-enyl)chroman-15-one	Calmodulin-1	CALM1
C2	(2S)-7-hydroxy-2-(4-hydroxyphenyl)-8-(3-methylbut-2-enyl)chroman-4-one	Aromatase	CYP19A1
C2	(2S)-7-hydroxy-2-(4-hydroxyphenyl)-8-(3-methylbut-2-enyl)chroman-4-one	ATP-binding cassette sub-family G member 2	ABCG2
C2	(2S)-7-hydroxy-2-(4-hydroxyphenyl)-8-(3-methylbut-2-enyl)chroman-4-one	Estrogen receptor	ESR1
C2	(2S)-7-hydroxy-2-(4-hydroxyphenyl)-8-(3-methylbut-2-enyl)chroman-4-one	Estrogen receptor beta	ESR2
C2	(2S)-7-hydroxy-2-(4-hydroxyphenyl)-8-(3-methylbut-2-enyl)chroman-4-one	Nitric oxide synthase, inducible	NOS2
C2	(2S)-7-hydroxy-2-(4-hydroxyphenyl)-8-(3-methylbut-2-enyl)chroman-4-one	Tyrosine-protein phosphatase non-receptor type 1	PTPN1
C2	(2S)-7-hydroxy-2-(4-hydroxyphenyl)-8-(3-methylbut-2-enyl)chroman-5-one	Prostaglandin G/H synthase 1	PTGS1
C2	(2S)-7-hydroxy-2-(4-hydroxyphenyl)-8-(3-methylbut-2-enyl)chroman-6-one	Estrogen receptor	ESR1
C2	(2S)-7-hydroxy-2-(4-hydroxyphenyl)-8-(3-methylbut-2-enyl)chroman-9-one	Prostaglandin G/H synthase 2	PTGS2
C3	(S)-Coclaurine	Amine oxidase [flavin-containing] B	MAOB
C3	(S)-Coclaurine	Beta-1 adrenergic receptor	ADRB1
C3	(S)-Coclaurine	Beta-2 adrenergic receptor	ADRB2
C3	(S)-Coclaurine	Calmodulin-1	CALM1
C3	(S)-Coclaurine	Carbonic anhydrase II	CA2
C3	(S)-Coclaurine	D(2) dopamine receptor	DRD2
C3	(S)-Coclaurine	Dopamine D1 receptor	DRD1
C3	(S)-Coclaurine	Muscarinic acetylcholine receptor M1	CHRM1
C3	(S)-Coclaurine	Prostaglandin G/H synthase 1	PTGS1
C3	(S)-Coclaurine	Prostaglandin G/H synthase 2	PTGS2
C3	(S)-Coclaurine	Retinoic acid receptor RXR-alpha	RXRA
C3	(S)-Coclaurine	Sodium-dependent dopamine transporter	SLC6A3
C3	(S)-Coclaurine	Sodium-dependent serotonin transporter	SLC6A4
C4	1,7-Dimethoxyxanthone	Amine oxidase [flavin-containing] A	MAOA
C5	1-Methoxyphaseollidin	Prostaglandin G/H synthase 2	PTGS2
C5	1-Methoxyphaseollidin	Nitric-oxide synthase, endothelial	NOS3
C5	1-Methoxyphaseollidin	Retinoic acid receptor RXR-alpha	RXRA
C5	1-Methoxyphaseollidin	Beta-2 adrenergic receptor	ADRB2
C5	1-Methoxyphaseollidin	Estrogen receptor beta	ESR2
C5	1-Methoxyphaseollidin	Mitogen-activated protein kinase 14	MAPK14
C5	1-Methoxyphaseollidin	Nitric oxide synthase, inducible	NOS2
C5	1-Methoxyphaseollidin	Glycogen synthase kinase-3 beta	GSK3B
C5	1-Methoxyphaseollidin	Phosphatidylinositol-4,5-bisphosphate 3-kinase catalytic subunit, gamma isoform	PIK3CG
C5	1-Methoxyphaseollidin	Calmodulin-1	CALM1
C5	1-Methoxyphaseollidin	Prostaglandin G/H synthase 1	PTGS1
C5	1-Methoxyphaseollidin	Estrogen receptor	ESR1
C5	1-Methoxyphaseollidin	Androgen receptor	AR
C5	1-Methoxyphaseollidin	Peroxisome proliferator activated receptor gamma	PPARG
C6	3，4 5-trimethoxycinnamic acid	Multidrug resistance protein 1	ABCB1
C7	3,4-Dimethoxycinnamic acid	ATP-binding cassette sub-family G member 2	ABCG2
C7	3,4-Dimethoxycinnamic acid	Carbonic anhydrase 2	CA2
C7	3,4-Dimethoxycinnamic acid	Cytochrome P450 1A2	CYP1A2
C7	3,4-Dimethoxycinnamic acid	Nuclear factor NF-kappa-B p105 subunit	NFKB1
C7	3,4-Dimethoxycinnamic acid	Signal transducer and activator of transcription 1-alpha/beta	STAT1
C7	3,4-Dimethoxycinnamic acid	Transcription factor AP-1	JUN
C8	3'-Hydroxy-4'-O-Methylglabridin	Peroxisome proliferator activated receptor gamma	PPARG
C8	3'-Hydroxy-4'-O-Methylglabridin	Prostaglandin G/H synthase 2	PTGS2
C8	3'-Hydroxy-4'-O-Methylglabridin	Coagulation factor VII	F7
C8	3'-Hydroxy-4'-O-Methylglabridin	Beta-2 adrenergic receptor	ADRB2
C8	3'-Hydroxy-4'-O-Methylglabridin	Estrogen receptor beta	ESR2
C8	3'-Hydroxy-4'-O-Methylglabridin	Mitogen-activated protein kinase 14	MAPK14
C8	3'-Hydroxy-4'-O-Methylglabridin	Glycogen synthase kinase-3 beta	GSK3B
C8	3'-Hydroxy-4'-O-Methylglabridin	Serine/threonine-protein kinase Chk1	CHEK1
C8	3'-Hydroxy-4'-O-Methylglabridin	Calcium-activated potassium channel subunit alpha 1	KCNMA1
C8	3'-Hydroxy-4'-O-Methylglabridin	Calmodulin-1	CALM1
C8	3'-Hydroxy-4'-O-Methylglabridin	Nitric oxide synthase, inducible	NOS2
C8	3'-Hydroxy-4'-O-Methylglabridin	Prostaglandin G/H synthase 1	PTGS1
C8	3'-Hydroxy-4'-O-Methylglabridin	Estrogen receptor	ESR1
C8	3'-Hydroxy-4'-O-Methylglabridin	Androgen receptor	AR
C9	3'-Methoxyglabridin	Calmodulin-1	CALM1
C9	3'-Methoxyglabridin	Prostaglandin G/H synthase 2	PTGS2
C9	3'-Methoxyglabridin	Coagulation factor VII	F7
C9	3'-Methoxyglabridin	Retinoic acid receptor RXR-alpha	RXRA
C9	3'-Methoxyglabridin	Acetylcholinesterase	ACHE
C9	3'-Methoxyglabridin	Beta-2 adrenergic receptor	ADRB2
C9	3'-Methoxyglabridin	Estrogen receptor beta	ESR2
C9	3'-Methoxyglabridin	Mitogen-activated protein kinase 14	MAPK14
C9	3'-Methoxyglabridin	Glycogen synthase kinase-3 beta	GSK3B
C9	3'-Methoxyglabridin	Serine/threonine-protein kinase Chk1	CHEK1
C9	3'-Methoxyglabridin	Calcium-activated potassium channel subunit alpha 1	KCNMA1
C9	3'-Methoxyglabridin	Nitric oxide synthase, inducible	NOS2
C9	3'-Methoxyglabridin	Prostaglandin G/H synthase 1	PTGS1
C9	3'-Methoxyglabridin	Estrogen receptor	ESR1
C9	3'-Methoxyglabridin	Androgen receptor	AR
C9	3'-Methoxyglabridin	Peroxisome proliferator activated receptor gamma	PPARG
C10	3β-acetoxyatractylone	Retinoic acid receptor RXR-alpha	RXRA
C10	3β-acetoxyatractylone	Acetylcholinesterase	ACHE
C10	3β-acetoxyatractylone	Muscarinic acetylcholine receptor M2	CHRM2
C10	3β-acetoxyatractylone	Beta-2 adrenergic receptor	ADRB2
C10	3β-acetoxyatractylone	Dipeptidyl peptidase IV	DPP4
C10	3β-acetoxyatractylone	Neuronal acetylcholine receptor protein, alpha-7 chain	CHRNA7
C10	3β-acetoxyatractylone	Androgen receptor	AR
C10	3β-acetoxyatractylone	Muscarinic acetylcholine receptor M1	CHRM1
C10	3β-acetoxyatractylone	Nitric-oxide synthase, endothelial	NOS3
C10	3β-acetoxyatractylone	Prostaglandin G/H synthase 2	PTGS2
C11	6-prenylated eriodictyol	Prostaglandin G/H synthase 2	PTGS2
C11	6-prenylated eriodictyol	Coagulation factor VII	F7
C11	6-prenylated eriodictyol	Calmodulin-1	CALM1
C11	6-prenylated eriodictyol	Nitric oxide synthase, inducible	NOS2
C11	6-prenylated eriodictyol	Estrogen receptor	ESR1
C12	7-Acetoxy-2-methylisoflavone	Nitric-oxide synthase, endothelial	NOS3
C12	7-Acetoxy-2-methylisoflavone	Retinoic acid receptor RXR-alpha	RXRA
C12	7-Acetoxy-2-methylisoflavone	Acetylcholinesterase	ACHE
C12	7-Acetoxy-2-methylisoflavone	Beta-2 adrenergic receptor	ADRB2
C12	7-Acetoxy-2-methylisoflavone	Dipeptidyl peptidase IV	DPP4
C12	7-Acetoxy-2-methylisoflavone	Mitogen-activated protein kinase 14	MAPK14
C12	7-Acetoxy-2-methylisoflavone	Glycogen synthase kinase-3 beta	GSK3B
C12	7-Acetoxy-2-methylisoflavone	Serine/threonine-protein kinase Chk1	CHEK1
C12	7-Acetoxy-2-methylisoflavone	Calmodulin-1	CALM1
C12	7-Acetoxy-2-methylisoflavone	Nitric oxide synthase, inducible	NOS2
C12	7-Acetoxy-2-methylisoflavone	Prostaglandin G/H synthase 1	PTGS1
C12	7-Acetoxy-2-methylisoflavone	Estrogen receptor	ESR1
C12	7-Acetoxy-2-methylisoflavone	Androgen receptor	AR
C12	7-Acetoxy-2-methylisoflavone	Peroxisome proliferator activated receptor gamma	PPARG
C12	7-Acetoxy-2-methylisoflavone	Prostaglandin G/H synthase 2	PTGS2
C13	7-Methoxy-2-methyl isoflavone	Beta-1 adrenergic receptor	ADRB1
C13	7-Methoxy-2-methyl isoflavone	Peroxisome proliferator activated receptor gamma	PPARG
C13	7-Methoxy-2-methyl isoflavone	Prostaglandin G/H synthase 2	PTGS2
C13	7-Methoxy-2-methyl isoflavone	Retinoic acid receptor RXR-alpha	RXRA
C13	7-Methoxy-2-methyl isoflavone	Acetylcholinesterase	ACHE
C13	7-Methoxy-2-methyl isoflavone	Sodium-dependent dopamine transporter	SLC6A3
C13	7-Methoxy-2-methyl isoflavone	Beta-2 adrenergic receptor	ADRB2
C13	7-Methoxy-2-methyl isoflavone	Sodium-dependent serotonin transporter	SLC6A4
C13	7-Methoxy-2-methyl isoflavone	Estrogen receptor beta	ESR2
C13	7-Methoxy-2-methyl isoflavone	Dipeptidyl peptidase IV	DPP4
C13	7-Methoxy-2-methyl isoflavone	Mitogen-activated protein kinase 14	MAPK14
C13	7-Methoxy-2-methyl isoflavone	Glycogen synthase kinase-3 beta	GSK3B
C13	7-Methoxy-2-methyl isoflavone	Amine oxidase [flavin-containing] A	MAOA
C13	7-Methoxy-2-methyl isoflavone	Aromatase	CYP19A1
C13	7-Methoxy-2-methyl isoflavone	Cytochrome P450 1A2	CYP1A2
C13	7-Methoxy-2-methyl isoflavone	Nitric oxide synthase, inducible	NOS2
C13	7-Methoxy-2-methyl isoflavone	Amine oxidase [flavin-containing] B	MAOB
C13	7-Methoxy-2-methyl isoflavone	Neuronal acetylcholine receptor protein, alpha-7 chain	CHRNA7
C13	7-Methoxy-2-methyl isoflavone	Serine/threonine-protein kinase Chk1	CHEK1
C13	7-Methoxy-2-methyl isoflavone	Prostaglandin G/H synthase 1	PTGS1
C13	7-Methoxy-2-methyl isoflavone	Calmodulin-1	CALM1
C13	7-Methoxy-2-methyl isoflavone	Nitric-oxide synthase, endothelial	NOS3
C13	7-Methoxy-2-methyl isoflavone	Dopamine D1 receptor	DRD1
C13	7-Methoxy-2-methyl isoflavone	Muscarinic acetylcholine receptor M1	CHRM1
C13	7-Methoxy-2-methyl isoflavone	Estrogen receptor	ESR1
C13	7-Methoxy-2-methyl isoflavone	Androgen receptor	AR
C14	8β-ethoxy atractylenolide Ⅲ	Neuronal acetylcholine receptor protein, alpha-7 chain	CHRNA7
C14	8β-ethoxy atractylenolide Ⅲ	Prostaglandin G/H synthase 2	PTGS2
C16	Aposiopolamine	Beta-2 adrenergic receptor	ADRB2
C16	Aposiopolamine	Dipeptidyl peptidase IV	DPP4
C16	Aposiopolamine	Muscarinic acetylcholine receptor M1	CHRM1
C16	Aposiopolamine	Sodium-dependent dopamine transporter	SLC6A3
C16	Aposiopolamine	Sodium-dependent noradrenaline transporter	SLC6A2
C16	Aposiopolamine	Sodium-dependent serotonin transporter	SLC6A4
C17	arachidonate	Arachidonate 12-lipoxygenase, 12S-type	ALOX12
C17	arachidonate	Arachidonate 5-lipoxygenase	ALOX5
C17	arachidonate	Cannabinoid receptor 1	CNR1
C17	arachidonate	Cannabinoid receptor 2	CNR2
C17	arachidonate	Cytosolic phospholipase A2	PLA2G4A
C17	arachidonate	Fatty acid-binding protein, heart	FABP3
C17	arachidonate	Fatty-acid amide hydrolase 1	FAAH
C17	arachidonate	Monoglyceride lipase	MGLL
C17	arachidonate	Oxoeicosanoid receptor 1	OXER1
C17	arachidonate	Peroxisome proliferator-activated receptor alpha	PPARA
C17	arachidonate	Peroxisome proliferator-activated receptor delta	PPARD
C17	arachidonate	Peroxisome proliferator-activated receptor gamma	PPARG
C17	arachidonate	Prostaglandin G/H synthase 1	PTGS1
C17	arachidonate	Prostaglandin G/H synthase 2	PTGS2
C18	beta-sitosterol	5-hydroxytryptamine 2A receptor	HTR2A
C18	beta-sitosterol	Apoptosis regulator BAX	BAX
C18	beta-sitosterol	Apoptosis regulator Bcl-2	BCL2
C18	beta-sitosterol	Beta-2 adrenergic receptor	ADRB2
C18	beta-sitosterol	Caspase-3	CASP3
C18	beta-sitosterol	Caspase-8	CASP8
C18	beta-sitosterol	Caspase-9	CASP9
C18	beta-sitosterol	Dopamine D1 receptor	DRD1
C18	beta-sitosterol	Microtubule-associated protein 2	MAP2
C18	beta-sitosterol	Muscarinic acetylcholine receptor M1	CHRM1
C18	beta-sitosterol	Muscarinic acetylcholine receptor M2	CHRM2
C18	beta-sitosterol	Neuronal acetylcholine receptor protein, alpha-7 chain	CHRNA7
C18	beta-sitosterol	Oxysterols receptor LXR-alpha	NR1H3
C18	beta-sitosterol	Oxysterols receptor LXR-beta	NR1H2
C18	beta-sitosterol	Phosphatidylinositol-4,5-bisphosphate 3-kinase catalytic subunit, gamma isoform	PIK3CG
C18	beta-sitosterol	Prostaglandin G/H synthase 1	PTGS1
C18	beta-sitosterol	Prostaglandin G/H synthase 2	PTGS2
C18	beta-sitosterol	Serum paraoxonase/arylesterase 1	PON1
C18	beta-sitosterol	Sodium-dependent serotonin transporter	SLC6A4
C18	beta-sitosterol	Steroid 17-alpha-hydroxylase/17,20 lyase	CYP17A1
C18	beta-sitosterol	Sterol regulatory element-binding protein 2	SREBF2
C18	beta-sitosterol	Transcription factor AP-1	JUN
C20	dehydroglyasperins C	Androgen receptor	AR
C20	dehydroglyasperins C	Beta-2 adrenergic receptor	ADRB2
C20	dehydroglyasperins C	Calmodulin-1	CALM1
C20	dehydroglyasperins C	Estrogen receptor	ESR1
C20	dehydroglyasperins C	Estrogen receptor beta	ESR2
C20	dehydroglyasperins C	Mitogen-activated protein kinase 14	MAPK14
C20	dehydroglyasperins C	Nitric oxide synthase, inducible	NOS2
C20	dehydroglyasperins C	Peroxisome proliferator activated receptor gamma	PPARG
C20	dehydroglyasperins C	Prostaglandin G/H synthase 2	PTGS2
C20	dehydroglyasperins C	Serine/threonine-protein kinase Chk1	CHEK1
C21	Deoxyharringtonine	Androgen receptor	AR
C21	Deoxyharringtonine	Mineralocorticoid receptor	NR3C2
C22	DFV	Amine oxidase [flavin-containing] B	MAOB
C22	DFV	Aromatase	CYP19A1
C22	DFV	Beta-2 adrenergic receptor	ADRB2
C22	DFV	Phosphatidylinositol-4,5-bisphosphate 3-kinase catalytic subunit, gamma isoform	PIK3CG
C22	DFV	Prostaglandin G/H synthase 1	PTGS1
C22	DFV	Prostaglandin G/H synthase 2	PTGS2
C22	DFV	Retinoic acid receptor RXR-alpha	RXRA
C22	DFV	Sodium-dependent serotonin transporter	SLC6A4
C23	Diop	Beta-2 adrenergic receptor	ADRB2
C24	euchrenone	Beta-secretase1	BACE1
C24	euchrenone	Calmodulin-1	CALM1
C24	euchrenone	Estrogen receptor	ESR1
C24	euchrenone	Estrogen receptor beta	ESR2
C24	euchrenone	Nitric oxide synthase, inducible	NOS2
C24	euchrenone	Prostaglandin G/H synthase 2	PTGS2
C25	Eurycarpin A	Androgen receptor	AR
C25	Eurycarpin A	Calmodulin-1	CALM1
C25	Eurycarpin A	Dipeptidyl peptidase IV	DPP4
C25	Eurycarpin A	Estrogen receptor	ESR1
C25	Eurycarpin A	Estrogen receptor beta	ESR2
C25	Eurycarpin A	Glycogen synthase kinase-3 beta	GSK3B
C25	Eurycarpin A	Mitogen-activated protein kinase 14	MAPK14
C25	Eurycarpin A	Nitric oxide synthase, inducible	NOS2
C25	Eurycarpin A	Peroxisome proliferator activated receptor gamma	PPARG
C25	Eurycarpin A	Prostaglandin G/H synthase 2	PTGS2
C25	Eurycarpin A	Serine/threonine-protein kinase Chk1	CHEK1
C25	Eurycarpin A	Tyrosine-protein phosphatase non-receptor type 1	PTPN1
C26	formononetin	Acetylcholinesterase	ACHE
C26	formononetin	Aldehyde dehydrogenase, mitochondrial	ALDH2
C26	formononetin	Amine oxidase [flavin-containing] B	MAOB
C26	formononetin	Androgen receptor	AR
C26	formononetin	Aromatase	CYP19A1
C26	formononetin	Beta-2 adrenergic receptor	ADRB2
C26	formononetin	Calmodulin-1	CALM1
C26	formononetin	Dipeptidyl peptidase IV	DPP4
C26	formononetin	Estrogen receptor	ESR1
C26	formononetin	Estrogen receptor beta	ESR2
C26	formononetin	Glycogen synthase kinase-3 beta	GSK3B
C26	formononetin	Interleukin-2	IL2
C26	formononetin	Interleukin-4	IL4
C26	formononetin	Macrophage migration inhibitory factor	MIF
C26	formononetin	Mitogen-activated protein kinase 14	MAPK14
C26	formononetin	Muscarinic acetylcholine receptor M1	CHRM1
C26	formononetin	NAD-dependent deacetylase sirtuin-1	SIRT1
C26	formononetin	Nitric oxide synthase, inducible	NOS2
C26	formononetin	Nitric-oxide synthase, endothelial	NOS3
C26	formononetin	Peroxisome proliferator activated receptor gamma	PPARG
C26	formononetin	Peroxisome proliferator-activated receptor gamma	PPARG
C26	formononetin	Prostaglandin G/H synthase 1	PTGS1
C26	formononetin	Prostaglandin G/H synthase 2	PTGS2
C26	formononetin	Retinoic acid receptor RXR-alpha	RXRA
C26	formononetin	Serine/threonine-protein kinase Chk1	CHEK1
C26	formononetin	Sodium-dependent dopamine transporter	SLC6A3
C26	formononetin	Sodium-dependent serotonin transporter	SLC6A4
C26	formononetin	Transcription factor AP-1	JUN
C27	Frutinone A	Acetylcholinesterase	ACHE
C27	Frutinone A	Androgen receptor	AR
C27	Frutinone A	Beta-2 adrenergic receptor	ADRB2
C27	Frutinone A	Dipeptidyl peptidase IV	DPP4
C27	Frutinone A	Neuronal acetylcholine receptor protein, alpha-7 chain	CHRNA7
C27	Frutinone A	Peroxisome proliferator activated receptor gamma	PPARG
C27	Frutinone A	Phosphatidylinositol-4,5-bisphosphate 3-kinase catalytic subunit, gamma isoform	PIK3CG
C27	Frutinone A	Prostaglandin G/H synthase 1	PTGS1
C27	Frutinone A	Prostaglandin G/H synthase 2	PTGS2
C27	Frutinone A	Retinoic acid receptor RXR-alpha	RXRA
C28	Fumarine	5-hydroxytryptamine 2A receptor	HTR2A
C28	Fumarine	Beta-2 adrenergic receptor	ADRB2
C28	Fumarine	Calmodulin-1	CALM1
C28	Fumarine	Coagulation factor VII	F7
C28	Fumarine	Delta-type opioid receptor	OPRD1
C28	Fumarine	Dopamine D1 receptor	DRD1
C28	Fumarine	Muscarinic acetylcholine receptor M1	CHRM1
C28	Fumarine	Prostaglandin G/H synthase 1	PTGS1
C28	Fumarine	Prostaglandin G/H synthase 2	PTGS2
C28	Fumarine	Sodium-dependent dopamine transporter	SLC6A3
C28	Fumarine	Sodium-dependent serotonin transporter	SLC6A4
C29	gadelaidic acid	3-hydroxy-3-methylglutaryl-coenzyme A reductase	HMGCR
C29	gadelaidic acid	Fatty acid-binding protein, heart	FABP3
C29	gadelaidic acid	Fatty-acid amide hydrolase 1	FAAH
C29	gadelaidic acid	Liver carboxylesterase 1	CES1
C29	gadelaidic acid	Oxoeicosanoid receptor 1	OXER1
C29	gadelaidic acid	Peroxisome proliferator-activated receptor alpha	PPARA
C29	gadelaidic acid	Peroxisome proliferator-activated receptor delta	PPARD
C29	gadelaidic acid	Peroxisome proliferator-activated receptor gamma	PPARG
C29	gadelaidic acid	Toll-like receptor 2	TLR2
C30	Gancaonin A	Acetylcholinesterase	ACHE
C30	Gancaonin A	Androgen receptor	AR
C30	Gancaonin A	Calmodulin-1	CALM1
C30	Gancaonin A	Dipeptidyl peptidase IV	DPP4
C30	Gancaonin A	Estrogen receptor	ESR1
C30	Gancaonin A	Estrogen receptor beta	ESR2
C30	Gancaonin A	Glycogen synthase kinase-3 beta	GSK3B
C30	Gancaonin A	Multidrug resistance protein 1	ABCB1
C30	Gancaonin A	Nitric oxide synthase, inducible	NOS2
C30	Gancaonin A	Peroxisome proliferator activated receptor gamma	PPARG
C30	Gancaonin A	Prostaglandin G/H synthase 2	PTGS2
C30	Gancaonin A	Serine/threonine-protein kinase Chk1	CHEK1
C30	Gancaonin A	Tyrosine-protein phosphatase non-receptor type 1	PTPN1
C31	Gancaonin B	Androgen receptor	AR
C31	Gancaonin B	Beta-2 adrenergic receptor	ADRB2
C31	Gancaonin B	Calmodulin-1	CALM1
C31	Gancaonin B	Coagulation factor VII	F7
C31	Gancaonin B	Dipeptidyl peptidase IV	DPP4
C31	Gancaonin B	Estrogen receptor	ESR1
C31	Gancaonin B	Estrogen receptor beta	ESR2
C31	Gancaonin B	Glycogen synthase kinase-3 beta	GSK3B
C31	Gancaonin B	Nitric oxide synthase, inducible	NOS2
C31	Gancaonin B	Peroxisome proliferator activated receptor gamma	PPARG
C31	Gancaonin B	Prostaglandin G/H synthase 2	PTGS2
C31	Gancaonin B	Serine/threonine-protein kinase Chk1	CHEK1
C31	Gancaonin B	Tyrosine-protein phosphatase non-receptor type 1	PTPN1
C32	Gancaonin G	Androgen receptor	AR
C32	Gancaonin G	Calmodulin-1	CALM1
C32	Gancaonin G	Dipeptidyl peptidase IV	DPP4
C32	Gancaonin G	Estrogen receptor	ESR1
C32	Gancaonin G	Estrogen receptor beta	ESR2
C32	Gancaonin G	Glycogen synthase kinase-3 beta	GSK3B
C32	Gancaonin G	Mitogen-activated protein kinase 14	MAPK14
C32	Gancaonin G	Nitric oxide synthase, inducible	NOS2
C32	Gancaonin G	Nitric-oxide synthase, endothelial	NOS3
C32	Gancaonin G	Peroxisome proliferator activated receptor gamma	PPARG
C32	Gancaonin G	Prostaglandin G/H synthase 2	PTGS2
C32	Gancaonin G	Serine/threonine-protein kinase Chk1	CHEK1
C32	Gancaonin G	Tyrosine-protein phosphatase non-receptor type 1	PTPN1
C33	Gancaonin H	Androgen receptor	AR
C33	Gancaonin H	Calmodulin-1	CALM1
C33	Gancaonin H	Estrogen receptor	ESR1
C33	Gancaonin H	Prostaglandin G/H synthase 2	PTGS2
C33	Gancaonin H	Tyrosine-protein phosphatase non-receptor type 1	PTPN1
C34	Ginsenoside-Rh4_qt	Mineralocorticoid receptor	NR3C2
C35	Girinimbin	Beta-2 adrenergic receptor	ADRB2
C35	Girinimbin	Neuronal acetylcholine receptor protein, alpha-7 chain	CHRNA7
C35	Girinimbin	Phosphatidylinositol-4,5-bisphosphate 3-kinase catalytic subunit, gamma isoform	PIK3CG
C35	Girinimbin	Prostaglandin G/H synthase 1	PTGS1
C35	Girinimbin	Prostaglandin G/H synthase 2	PTGS2
C35	Girinimbin	Retinoic acid receptor RXR-alpha	RXRA
C35	Girinimbin	X-box-binding protein 1	XBP1
C36	Glabranin	Aromatase	CYP19A1
C36	Glabranin	ATP-binding cassette sub-family G member 2	ABCG2
C36	Glabranin	Calmodulin-1	CALM1
C36	Glabranin	Estrogen receptor	ESR1
C36	Glabranin	Nitric oxide synthase, inducible	NOS2
C36	Glabranin	Nitric-oxide synthase, endothelial	NOS3
C36	Glabranin	Prostaglandin G/H synthase 1	PTGS1
C36	Glabranin	Prostaglandin G/H synthase 2	PTGS2
C37	Glabrene	Androgen receptor	AR
C37	Glabrene	Beta-2 adrenergic receptor	ADRB2
C37	Glabrene	Calmodulin-1	CALM1
C37	Glabrene	Estrogen receptor	ESR1
C37	Glabrene	Estrogen receptor beta	ESR2
C37	Glabrene	Glycogen synthase kinase-3 beta	GSK3B
C37	Glabrene	Mitogen-activated protein kinase 14	MAPK14
C37	Glabrene	Nitric oxide synthase, inducible	NOS2
C37	Glabrene	Peroxisome proliferator activated receptor gamma	PPARG
C37	Glabrene	Prostaglandin G/H synthase 1	PTGS1
C37	Glabrene	Prostaglandin G/H synthase 2	PTGS2
C37	Glabrene	Retinoic acid receptor RXR-alpha	RXRA
C38	Glabridin	Acetylcholinesterase	ACHE
C38	Glabridin	Androgen receptor	AR
C38	Glabridin	Beta-2 adrenergic receptor	ADRB2
C38	Glabridin	Calmodulin-1	CALM1
C38	Glabridin	Estrogen receptor	ESR1
C38	Glabridin	Estrogen receptor beta	ESR2
C38	Glabridin	Glycogen synthase kinase-3 beta	GSK3B
C38	Glabridin	Heat shock protein HSP 90-alpha	HSP90AA1
C38	Glabridin	Mitogen-activated protein kinase 14	MAPK14
C38	Glabridin	Muscarinic acetylcholine receptor M1	CHRM1
C38	Glabridin	Nitric oxide synthase, inducible	NOS2
C38	Glabridin	Peroxisome proliferator activated receptor gamma	PPARG
C38	Glabridin	Prostaglandin G/H synthase 2	PTGS2
C38	Glabridin	Retinoic acid receptor RXR-alpha	RXRA
C38	Glabridin	Serine/threonine-protein kinase Chk1	CHEK1
C39	Glabrone	Acetylcholinesterase	ACHE
C39	Glabrone	Androgen receptor	AR
C39	Glabrone	Calmodulin-1	CALM1
C39	Glabrone	Dipeptidyl peptidase IV	DPP4
C39	Glabrone	Estrogen receptor	ESR1
C39	Glabrone	Estrogen receptor beta	ESR2
C39	Glabrone	Glycogen synthase kinase-3 beta	GSK3B
C39	Glabrone	Mitogen-activated protein kinase 14	MAPK14
C39	Glabrone	Nitric oxide synthase, inducible	NOS2
C39	Glabrone	Peroxisome proliferator activated receptor gamma	PPARG
C39	Glabrone	Prostaglandin G/H synthase 1	PTGS1
C39	Glabrone	Prostaglandin G/H synthase 2	PTGS2
C39	Glabrone	Retinoic acid receptor RXR-alpha	RXRA
C39	Glabrone	Serine/threonine-protein kinase Chk1	CHEK1
C40	Glepidotin A	Androgen receptor	AR
C40	Glepidotin A	Calmodulin-1	CALM1
C40	Glepidotin A	Coagulation factor VII	F7
C40	Glepidotin A	Dipeptidyl peptidase IV	DPP4
C40	Glepidotin A	Estrogen receptor	ESR1
C40	Glepidotin A	Glycogen synthase kinase-3 beta	GSK3B
C40	Glepidotin A	Mitogen-activated protein kinase 14	MAPK14
C40	Glepidotin A	Multidrug resistance protein 1	ABCB1
C40	Glepidotin A	Nitric oxide synthase, inducible	NOS2
C40	Glepidotin A	Nitric-oxide synthase, endothelial	NOS3
C40	Glepidotin A	Peroxisome proliferator activated receptor gamma	PPARG
C40	Glepidotin A	Prostaglandin G/H synthase 1	PTGS1
C40	Glepidotin A	Prostaglandin G/H synthase 2	PTGS2
C40	Glepidotin A	Retinoic acid receptor RXR-alpha	RXRA
C40	Glepidotin A	Serine/threonine-protein kinase Chk1	CHEK1
C41	Glepidotin B	Calmodulin-1	CALM1
C41	Glepidotin B	Coagulation factor VII	F7
C41	Glepidotin B	Estrogen receptor	ESR1
C41	Glepidotin B	Nitric-oxide synthase, endothelial	NOS3
C41	Glepidotin B	Prostaglandin G/H synthase 1	PTGS1
C41	Glepidotin B	Prostaglandin G/H synthase 2	PTGS2
C41	Glepidotin B	Retinoic acid receptor RXR-alpha	RXRA
C42	glyasperin B	Acetylcholinesterase	ACHE
C42	glyasperin B	Androgen receptor	AR
C42	glyasperin B	Calmodulin-1	CALM1
C42	glyasperin B	Coagulation factor VII	F7
C42	glyasperin B	Dipeptidyl peptidase IV	DPP4
C42	glyasperin B	Estrogen receptor	ESR1
C42	glyasperin B	Estrogen receptor beta	ESR2
C42	glyasperin B	Glycogen synthase kinase-3 beta	GSK3B
C42	glyasperin B	Nitric oxide synthase, inducible	NOS2
C42	glyasperin B	Peroxisome proliferator activated receptor gamma	PPARG
C42	glyasperin B	Prostaglandin G/H synthase 2	PTGS2
C43	Glyasperin C	Acetylcholinesterase	ACHE
C43	Glyasperin C	Androgen receptor	AR
C43	Glyasperin C	Calmodulin-1	CALM1
C43	Glyasperin C	Dipeptidyl peptidase IV	DPP4
C43	Glyasperin C	Estrogen receptor	ESR1
C43	Glyasperin C	Estrogen receptor beta	ESR2
C43	Glyasperin C	Glycogen synthase kinase-3 beta	GSK3B
C43	Glyasperin C	Mitogen-activated protein kinase 14	MAPK14
C43	Glyasperin C	Nitric oxide synthase, inducible	NOS2
C43	Glyasperin C	Peroxisome proliferator activated receptor gamma	PPARG
C43	Glyasperin C	Prostaglandin G/H synthase 2	PTGS2
C43	Glyasperin C	Retinoic acid receptor RXR-alpha	RXRA
C43	Glyasperin C	Serine/threonine-protein kinase Chk1	CHEK1
C44	glyasperin F	Androgen receptor	AR
C44	glyasperin F	Calmodulin-1	CALM1
C44	glyasperin F	Estrogen receptor	ESR1
C44	glyasperin F	Estrogen receptor beta	ESR2
C44	glyasperin F	Glycogen synthase kinase-3 beta	GSK3B
C44	glyasperin F	Mitogen-activated protein kinase 14	MAPK14
C44	glyasperin F	Nitric oxide synthase, inducible	NOS2
C44	glyasperin F	Peroxisome proliferator activated receptor gamma	PPARG
C44	glyasperin F	Prostaglandin G/H synthase 1	PTGS1
C44	glyasperin F	Prostaglandin G/H synthase 2	PTGS2
C45	Glyasperins M	Acetylcholinesterase	ACHE
C45	Glyasperins M	Androgen receptor	AR
C45	Glyasperins M	Calcium-activated potassium channel subunit alpha 1	KCNMA1
C45	Glyasperins M	Calmodulin-1	CALM1
C45	Glyasperins M	Coagulation factor VII	F7
C45	Glyasperins M	Estrogen receptor	ESR1
C45	Glyasperins M	Estrogen receptor beta	ESR2
C45	Glyasperins M	Glycogen synthase kinase-3 beta	GSK3B
C45	Glyasperins M	Nitric oxide synthase, inducible	NOS2
C45	Glyasperins M	Peroxisome proliferator activated receptor delta	PPARD
C45	Glyasperins M	Peroxisome proliferator activated receptor gamma	PPARG
C45	Glyasperins M	Prostaglandin G/H synthase 1	PTGS1
C45	Glyasperins M	Prostaglandin G/H synthase 2	PTGS2
C46	Glycyrin	Androgen receptor	AR
C46	Glycyrin	Calmodulin-1	CALM1
C46	Glycyrin	Dipeptidyl peptidase IV	DPP4
C46	Glycyrin	Estrogen receptor	ESR1
C46	Glycyrin	Estrogen receptor beta	ESR2
C46	Glycyrin	Nitric oxide synthase, inducible	NOS2
C46	Glycyrin	Peroxisome proliferator activated receptor gamma	PPARG
C46	Glycyrin	Prostaglandin G/H synthase 2	PTGS2
C46	Glycyrin	Serine/threonine-protein kinase Chk1	CHEK1
C47	Glycyrol	Glycogen synthase kinase-3 beta	GSK3B
C47	Glycyrol	Mitogen-activated protein kinase 14	MAPK14
C47	Glycyrol	Nitric oxide synthase, inducible	NOS2
C47	Glycyrol	Peroxisome proliferator activated receptor gamma	PPARG
C47	Glycyrol	Prostaglandin G/H synthase 2	PTGS2
C47	Glycyrol	Serine/threonine-protein kinase Chk1	CHEK1
C48	Glypallichalcone	Amine oxidase [flavin-containing] B	MAOB
C48	Glypallichalcone	Androgen receptor	AR
C48	Glypallichalcone	ATP-binding cassette sub-family G member 2	ABCG2
C48	Glypallichalcone	Beta-2 adrenergic receptor	ADRB2
C48	Glypallichalcone	Calmodulin-1	CALM1
C48	Glypallichalcone	Carbonic anhydrase II	CA2
C48	Glypallichalcone	Estrogen receptor	ESR1
C48	Glypallichalcone	Estrogen receptor beta	ESR2
C48	Glypallichalcone	Glycogen synthase kinase-3 beta	GSK3B
C48	Glypallichalcone	Mitogen-activated protein kinase 14	MAPK14
C48	Glypallichalcone	Muscarinic acetylcholine receptor M1	CHRM1
C48	Glypallichalcone	Neuronal acetylcholine receptor subunit alpha-7	CHRNA7
C48	Glypallichalcone	Nitric oxide synthase, inducible	NOS2
C48	Glypallichalcone	Peroxisome proliferator activated receptor gamma	PPARG
C48	Glypallichalcone	Prostaglandin G/H synthase 1	PTGS1
C48	Glypallichalcone	Prostaglandin G/H synthase 2	PTGS2
C48	Glypallichalcone	Serine/threonine-protein kinase Chk1	CHEK1
C48	Glypallichalcone	Sodium-dependent dopamine transporter	SLC6A3
C48	Glypallichalcone	Sodium-dependent serotonin transporter	SLC6A4
C48	Glypallichalcone	Tyrosine-protein phosphatase non-receptor type 1	PTPN1
C49	Glyzaglabrin	Androgen receptor	AR
C49	Glyzaglabrin	Dipeptidyl peptidase IV	DPP4
C49	Glyzaglabrin	Estrogen receptor	ESR1
C49	Glyzaglabrin	Estrogen receptor beta	ESR2
C49	Glyzaglabrin	Glycogen synthase kinase-3 beta	GSK3B
C49	Glyzaglabrin	Mitogen-activated protein kinase 14	MAPK14
C49	Glyzaglabrin	Nitric oxide synthase, inducible	NOS2
C49	Glyzaglabrin	Peroxisome proliferator activated receptor gamma	PPARG
C49	Glyzaglabrin	Phosphatidylinositol-4,5-bisphosphate 3-kinase catalytic subunit, gamma isoform	PIK3CG
C49	Glyzaglabrin	Prostaglandin G/H synthase 1	PTGS1
C49	Glyzaglabrin	Prostaglandin G/H synthase 2	PTGS2
C49	Glyzaglabrin	Serine/threonine-protein kinase Chk1	CHEK1
C50	harmine	5-hydroxytryptamine receptor 2C	HTR2C
C50	harmine	5-hydroxytryptamine receptor 6	HTR6
C50	harmine	Alpha-2A adrenergic receptor	ADRA2A
C50	harmine	Amine oxidase [flavin-containing] A	MAOA
C50	harmine	Casein kinase I isoform delta	CSNK1D
C50	harmine	Cyclin-dependent kinase 5 activator 1	CDK5R1
C50	harmine	Cyclin-dependent kinase 9	CDK9
C50	harmine	Cyclin-dependent-like kinase 5	CDK5
C50	harmine	Cytochrome P450 1A2	CYP1A2
C50	harmine	Dual specificity protein kinase CLK1	CLK1
C50	harmine	Dual specificity tyrosine-phosphorylation-regulated kinase 1A	DYRK1A
C50	harmine	Sodium-dependent noradrenaline transporter	SLC6A2
C51	HMO	Aldehyde dehydrogenase, mitochondrial	ALDH2
C51	HMO	Amine oxidase [flavin-containing] B	MAOB
C51	HMO	Androgen receptor	AR
C51	HMO	Arachidonate 12-lipoxygenase, 12S-type	ALOX12
C51	HMO	Beta-2 adrenergic receptor	ADRB2
C51	HMO	Calmodulin-1	CALM1
C51	HMO	Dipeptidyl peptidase IV	DPP4
C51	HMO	Estrogen receptor	ESR1
C51	HMO	Estrogen receptor beta	ESR2
C51	HMO	Glycogen synthase kinase-3 beta	GSK3B
C51	HMO	Interleukin-2	IL2
C51	HMO	Mitogen-activated protein kinase 14	MAPK14
C51	HMO	Muscarinic acetylcholine receptor M1	CHRM1
C51	HMO	Nitric oxide synthase, inducible	NOS2
C51	HMO	Peroxisome proliferator activated receptor gamma	PPARG
C51	HMO	Prostaglandin G/H synthase 1	PTGS1
C51	HMO	Prostaglandin G/H synthase 2	PTGS2
C51	HMO	Retinoic acid receptor RXR-alpha	RXRA
C51	HMO	Serine/threonine-protein kinase Chk1	CHEK1
C51	HMO	Sodium-dependent dopamine transporter	SLC6A3
C51	HMO	Sodium-dependent serotonin transporter	SLC6A4
C52	icos-5-enoic acid	Fatty acid-binding protein, heart	FABP3
C52	icos-5-enoic acid	Fatty-acid amide hydrolase 1	FAAH
C52	icos-5-enoic acid	Oxoeicosanoid receptor 1	OXER1
C52	icos-5-enoic acid	Peroxisome proliferator-activated receptor alpha	PPARA
C52	icos-5-enoic acid	Peroxisome proliferator-activated receptor delta	PPARD
C52	icos-5-enoic acid	Peroxisome proliferator-activated receptor gamma	PPARG
C52	icos-5-enoic acid	Toll-like receptor 2	TLR2
C53	Inermin	Beta-2 adrenergic receptor	ADRB2
C53	Inermin	Calmodulin-1	CALM1
C53	Inermin	Neuronal acetylcholine receptor protein, alpha-7 chain	CHRNA7
C53	Inermin	Phosphatidylinositol-4,5-bisphosphate 3-kinase catalytic subunit, gamma isoform	PIK3CG
C53	Inermin	Prostaglandin G/H synthase 1	PTGS1
C53	Inermin	Prostaglandin G/H synthase 2	PTGS2
C53	Inermin	Retinoic acid receptor RXR-alpha	RXRA
C53	Inermin	Sodium-dependent serotonin transporter	SLC6A4
C54	Inermine	Beta-2 adrenergic receptor	ADRB2
C54	Inermine	Calmodulin-1	CALM1
C54	Inermine	Muscarinic acetylcholine receptor M1	CHRM1
C54	Inermine	Phosphatidylinositol-4,5-bisphosphate 3-kinase catalytic subunit, gamma isoform	PIK3CG
C54	Inermine	Prostaglandin G/H synthase 1	PTGS1
C54	Inermine	Prostaglandin G/H synthase 2	PTGS2
C54	Inermine	Retinoic acid receptor RXR-alpha	RXRA
C55	Inflacoumarin A	Androgen receptor	AR
C55	Inflacoumarin A	Beta-2 adrenergic receptor	ADRB2
C55	Inflacoumarin A	Calmodulin-1	CALM1
C55	Inflacoumarin A	Dipeptidyl peptidase IV	DPP4
C55	Inflacoumarin A	Estrogen receptor	ESR1
C55	Inflacoumarin A	Peroxisome proliferator activated receptor gamma	PPARG
C55	Inflacoumarin A	Prostaglandin G/H synthase 1	PTGS1
C55	Inflacoumarin A	Prostaglandin G/H synthase 2	PTGS2
C56	Isoglycyrol	Androgen receptor	AR
C56	Isoglycyrol	Dipeptidyl peptidase IV	DPP4
C56	Isoglycyrol	Estrogen receptor	ESR1
C56	Isoglycyrol	Glycogen synthase kinase-3 beta	GSK3B
C56	Isoglycyrol	Nitric oxide synthase, inducible	NOS2
C56	Isoglycyrol	Prostaglandin G/H synthase 2	PTGS2
C57	isorhamnetin	Acetylcholinesterase	ACHE
C57	isorhamnetin	Amine oxidase [flavin-containing] A	MAOA
C57	isorhamnetin	Amine oxidase [flavin-containing] B	MAOB
C57	isorhamnetin	Amyloid-beta A4 protein	APP
C57	isorhamnetin	Androgen receptor	AR
C57	isorhamnetin	Arachidonate 12-lipoxygenase, 12S-type	ALOX12
C57	isorhamnetin	Arachidonate 15-lipoxygenase	ALOX15
C57	isorhamnetin	Arachidonate 5-lipoxygenase	ALOX5
C57	isorhamnetin	ATP-binding cassette sub-family G member 2	ABCG2
C57	isorhamnetin	Calmodulin-1	CALM1
C57	isorhamnetin	Carbonic anhydrase 2	CA2
C57	isorhamnetin	Coagulation factor VII	F7
C57	isorhamnetin	Death-associated protein kinase 1	DAPK1
C57	isorhamnetin	Dipeptidyl peptidase IV	DPP4
C57	isorhamnetin	Estrogen receptor	ESR1
C57	isorhamnetin	Estrogen receptor beta	ESR2
C57	isorhamnetin	Glutamate receptor 2	GRIA2
C57	isorhamnetin	Glycogen synthase kinase-3 beta	GSK3B
C57	isorhamnetin	Lactoylglutathione lyase	GLO1
C57	isorhamnetin	Microtubule-associated protein tau	MAPT
C57	isorhamnetin	Mitogen-activated protein kinase 14	MAPK14
C57	isorhamnetin	mRNA of Protein-tyrosine phosphatase, non-receptor type 1	PTPN1
C57	isorhamnetin	Multidrug resistance protein 1	ABCB1
C57	isorhamnetin	Multidrug resistance-associated protein 1	ABCC1
C57	isorhamnetin	Myeloperoxidase	MPO
C57	isorhamnetin	Neutrophil cytosol factor 1	NCF1
C57	isorhamnetin	Nitric oxide synthase, inducible	NOS2
C57	isorhamnetin	Nitric-oxide synthase, endothelial	NOS3
C57	isorhamnetin	Peroxisome proliferator activated receptor delta	PPARD
C57	isorhamnetin	Peroxisome proliferator activated receptor gamma	PPARG
C57	isorhamnetin	Phosphatidylinositol-4,5-bisphosphate 3-kinase catalytic subunit, gamma isoform	PIK3CG
C57	isorhamnetin	Prostaglandin G/H synthase 1	PTGS1
C57	isorhamnetin	Prostaglandin G/H synthase 2	PTGS2
C57	isorhamnetin	Serine/threonine-protein kinase Chk1	CHEK1
C57	isorhamnetin	Transcription factor p65	RELA
C58	Isotrifoliol	Androgen receptor	AR
C58	Isotrifoliol	Estrogen receptor	ESR1
C58	Isotrifoliol	Estrogen receptor beta	ESR2
C58	Isotrifoliol	Glycogen synthase kinase-3 beta	GSK3B
C58	Isotrifoliol	Mitogen-activated protein kinase 14	MAPK14
C58	Isotrifoliol	Nitric oxide synthase, inducible	NOS2
C58	Isotrifoliol	Phosphatidylinositol-4,5-bisphosphate 3-kinase catalytic subunit, gamma isoform	PIK3CG
C58	Isotrifoliol	Prostaglandin G/H synthase 2	PTGS2
C58	Isotrifoliol	Serine/threonine-protein kinase Chk1	CHEK1
C59	Jaranol	Amine oxidase [flavin-containing] A	MAOA
C59	Jaranol	Androgen receptor	AR
C59	Jaranol	ATP-binding cassette sub-family G member 2	ABCG2
C59	Jaranol	Calmodulin-1	CALM1
C59	Jaranol	Dipeptidyl peptidase IV	DPP4
C59	Jaranol	Estrogen receptor beta	ESR2
C59	Jaranol	Multidrug resistance protein 1	ABCB1
C59	Jaranol	Nitric oxide synthase, inducible	NOS2
C59	Jaranol	Prostaglandin G/H synthase 1	PTGS1
C59	Jaranol	Prostaglandin G/H synthase 2	PTGS2
C59	Jaranol	Serine/threonine-protein kinase Chk1	CHEK1
C60	Kanzonol F	Androgen receptor	AR
C60	Kanzonol F	Calmodulin-1	CALM1
C60	Kanzonol F	Estrogen receptor	ESR1
C60	Kanzonol F	Estrogen receptor beta	ESR2
C60	Kanzonol F	Prostaglandin G/H synthase 2	PTGS2
C61	kanzonols W	Androgen receptor	AR
C61	kanzonols W	Calmodulin-1	CALM1
C61	kanzonols W	Estrogen receptor	ESR1
C61	kanzonols W	Estrogen receptor beta	ESR2
C61	kanzonols W	Glycogen synthase kinase-3 beta	GSK3B
C61	kanzonols W	Mitogen-activated protein kinase 14	MAPK14
C61	kanzonols W	Nitric oxide synthase, inducible	NOS2
C61	kanzonols W	Peroxisome proliferator activated receptor gamma	PPARG
C61	kanzonols W	Prostaglandin G/H synthase 1	PTGS1
C61	kanzonols W	Prostaglandin G/H synthase 2	PTGS2
C61	kanzonols W	Retinoic acid receptor RXR-alpha	RXRA
C61	kanzonols W	Serine/threonine-protein kinase Chk1	CHEK1
C62	Licoagrocarpin	Acetylcholinesterase	ACHE
C62	Licoagrocarpin	Androgen receptor	AR
C62	Licoagrocarpin	Beta-2 adrenergic receptor	ADRB2
C62	Licoagrocarpin	Calmodulin-1	CALM1
C62	Licoagrocarpin	Estrogen receptor	ESR1
C62	Licoagrocarpin	Estrogen receptor beta	ESR2
C62	Licoagrocarpin	Glycogen synthase kinase-3 beta	GSK3B
C62	Licoagrocarpin	Mitogen-activated protein kinase 14	MAPK14
C62	Licoagrocarpin	Muscarinic acetylcholine receptor M1	CHRM1
C62	Licoagrocarpin	Nitric oxide synthase, inducible	NOS2
C62	Licoagrocarpin	Nitric-oxide synthase, endothelial	NOS3
C62	Licoagrocarpin	Peroxisome proliferator activated receptor gamma	PPARG
C62	Licoagrocarpin	Prostaglandin G/H synthase 1	PTGS1
C62	Licoagrocarpin	Prostaglandin G/H synthase 2	PTGS2
C62	Licoagrocarpin	Retinoic acid receptor RXR-alpha	RXRA
C62	Licoagrocarpin	Tyrosine-protein phosphatase non-receptor type 1	PTPN1
C63	Licoagroisoflavone	Androgen receptor	AR
C63	Licoagroisoflavone	Calmodulin-1	CALM1
C63	Licoagroisoflavone	Dipeptidyl peptidase IV	DPP4
C63	Licoagroisoflavone	Estrogen receptor	ESR1
C63	Licoagroisoflavone	Estrogen receptor beta	ESR2
C63	Licoagroisoflavone	Glycogen synthase kinase-3 beta	GSK3B
C63	Licoagroisoflavone	Mitogen-activated protein kinase 14	MAPK14
C63	Licoagroisoflavone	Nitric oxide synthase, inducible	NOS2
C63	Licoagroisoflavone	Peroxisome proliferator activated receptor gamma	PPARG
C63	Licoagroisoflavone	Prostaglandin G/H synthase 2	PTGS2
C63	Licoagroisoflavone	Serine/threonine-protein kinase Chk1	CHEK1
C64	licochalcone a	Androgen receptor	AR
C64	licochalcone a	Apoptosis regulator Bcl-2	BCL2
C64	licochalcone a	Beta-2 adrenergic receptor	ADRB2
C64	licochalcone a	Calmodulin-1	CALM1
C64	licochalcone a	Carbonic anhydrase II	CA2
C64	licochalcone a	Estrogen receptor	ESR1
C64	licochalcone a	Estrogen receptor beta	ESR2
C64	licochalcone a	G1/S-specific cyclin-D1	CCND1
C64	licochalcone a	Glycogen synthase kinase-3 beta	GSK3B
C64	licochalcone a	Mitogen-activated protein kinase 1	MAPK1
C64	licochalcone a	Mitogen-activated protein kinase 14	MAPK14
C64	licochalcone a	Muscarinic acetylcholine receptor M1	CHRM1
C64	licochalcone a	Nitric oxide synthase, inducible	NOS2
C64	licochalcone a	Peroxisome proliferator activated receptor gamma	PPARG
C64	licochalcone a	Prostaglandin G/H synthase 1	PTGS1
C64	licochalcone a	Prostaglandin G/H synthase 2	PTGS2
C64	licochalcone a	Serine/threonine-protein kinase Chk1	CHEK1
C64	licochalcone a	Signal transducer and activator of transcription 3	STAT3
C64	licochalcone a	Sodium-dependent dopamine transporter	SLC6A3
C64	licochalcone a	Transcription factor p65	RELA
C65	licochalcone G	Androgen receptor	AR
C65	licochalcone G	Calmodulin-1	CALM1
C65	licochalcone G	Estrogen receptor	ESR1
C65	licochalcone G	Estrogen receptor beta	ESR2
C65	licochalcone G	Glycogen synthase kinase-3 beta	GSK3B
C65	licochalcone G	Mitogen-activated protein kinase 14	MAPK14
C65	licochalcone G	Nitric oxide synthase, inducible	NOS2
C65	licochalcone G	Peroxisome proliferator activated receptor gamma	PPARG
C65	licochalcone G	Prostaglandin G/H synthase 2	PTGS2
C66	Licocoumarone	Androgen receptor	AR
C66	Licocoumarone	Estrogen receptor	ESR1
C66	Licocoumarone	Estrogen receptor beta	ESR2
C66	Licocoumarone	Glycogen synthase kinase-3 beta	GSK3B
C67	licoisoflavanone	Acetylcholinesterase	ACHE
C67	licoisoflavanone	Androgen receptor	AR
C67	licoisoflavanone	Calmodulin-1	CALM1
C67	licoisoflavanone	Coagulation factor VII	F7
C67	licoisoflavanone	Estrogen receptor	ESR1
C67	licoisoflavanone	Estrogen receptor beta	ESR2
C67	licoisoflavanone	Glycogen synthase kinase-3 beta	GSK3B
C67	licoisoflavanone	Nitric oxide synthase, inducible	NOS2
C67	licoisoflavanone	Peroxisome proliferator activated receptor gamma	PPARG
C67	licoisoflavanone	Prostaglandin G/H synthase 1	PTGS1
C67	licoisoflavanone	Prostaglandin G/H synthase 2	PTGS2
C68	Licoisoflavone	Androgen receptor	AR
C68	Licoisoflavone	Calmodulin-1	CALM1
C68	Licoisoflavone	Dipeptidyl peptidase IV	DPP4
C68	Licoisoflavone	Estrogen receptor	ESR1
C68	Licoisoflavone	Mitogen-activated protein kinase 14	MAPK14
C68	Licoisoflavone	Nitric oxide synthase, inducible	NOS2
C68	Licoisoflavone	Peroxisome proliferator activated receptor gamma	PPARG
C68	Licoisoflavone	Prostaglandin G/H synthase 2	PTGS2
C68	Licoisoflavone	Serine/threonine-protein kinase Chk1	CHEK1
C68	Licoisoflavone	Tyrosine-protein phosphatase non-receptor type 1	PTPN1
C69	Licoisoflavone B	Acetylcholinesterase	ACHE
C69	Licoisoflavone B	Androgen receptor	AR
C69	Licoisoflavone B	Calmodulin-1	CALM1
C69	Licoisoflavone B	Estrogen receptor	ESR1
C69	Licoisoflavone B	Estrogen receptor beta	ESR2
C69	Licoisoflavone B	Glycogen synthase kinase-3 beta	GSK3B
C69	Licoisoflavone B	Nitric oxide synthase, inducible	NOS2
C69	Licoisoflavone B	Peroxisome proliferator activated receptor gamma	PPARG
C69	Licoisoflavone B	Prostaglandin G/H synthase 2	PTGS2
C69	Licoisoflavone B	Serine/threonine-protein kinase Chk1	CHEK1
C70	Licoricone	Androgen receptor	AR
C70	Licoricone	Calmodulin-1	CALM1
C70	Licoricone	Estrogen receptor	ESR1
C70	Licoricone	Nitric oxide synthase, inducible	NOS2
C70	Licoricone	Peroxisome proliferator activated receptor gamma	PPARG
C70	Licoricone	Prostaglandin G/H synthase 2	PTGS2
C70	Licoricone	Serine/threonine-protein kinase Chk1	CHEK1
C71	Lupiwighteone	Androgen receptor	AR
C71	Lupiwighteone	Calmodulin-1	CALM1
C71	Lupiwighteone	Dipeptidyl peptidase IV	DPP4
C71	Lupiwighteone	Estrogen receptor	ESR1
C71	Lupiwighteone	Estrogen receptor beta	ESR2
C71	Lupiwighteone	Glycogen synthase kinase-3 beta	GSK3B
C71	Lupiwighteone	Mitogen-activated protein kinase 14	MAPK14
C71	Lupiwighteone	Nitric oxide synthase, inducible	NOS2
C71	Lupiwighteone	Peroxisome proliferator activated receptor gamma	PPARG
C71	Lupiwighteone	Prostaglandin G/H synthase 2	PTGS2
C71	Lupiwighteone	Serine/threonine-protein kinase Chk1	CHEK1
C71	Lupiwighteone	Tyrosine-protein phosphatase non-receptor type 1	PTPN1
C72	Mairin	G-protein coupled bile acid receptor 1	GPBAR1
C73	Medicarpin	5-hydroxytryptamine 2A receptor	HTR2A
C73	Medicarpin	Beta-2 adrenergic receptor	ADRB2
C73	Medicarpin	Calmodulin-1	CALM1
C73	Medicarpin	Delta-type opioid receptor	OPRD1
C73	Medicarpin	Dipeptidyl peptidase IV	DPP4
C73	Medicarpin	Dopamine D1 receptor	DRD1
C73	Medicarpin	Estrogen receptor	ESR1
C73	Medicarpin	Estrogen receptor beta	ESR2
C73	Medicarpin	Mitogen-activated protein kinase 10	MAPK10
C73	Medicarpin	Muscarinic acetylcholine receptor M1	CHRM1
C73	Medicarpin	Muscarinic acetylcholine receptor M2	CHRM2
C73	Medicarpin	Neuronal acetylcholine receptor protein, alpha-7 chain	CHRNA7
C73	Medicarpin	Nitric oxide synthase, inducible	NOS2
C73	Medicarpin	Phosphatidylinositol-4,5-bisphosphate 3-kinase catalytic subunit, gamma isoform	PIK3CG
C73	Medicarpin	Prostaglandin G/H synthase 1	PTGS1
C73	Medicarpin	Prostaglandin G/H synthase 2	PTGS2
C73	Medicarpin	Retinoic acid receptor RXR-alpha	RXRA
C73	Medicarpin	Sodium-dependent dopamine transporter	SLC6A3
C73	Medicarpin	Sodium-dependent serotonin transporter	SLC6A4
C74	Odoratin	Androgen receptor	AR
C74	Odoratin	Calmodulin-1	CALM1
C74	Odoratin	Dipeptidyl peptidase IV	DPP4
C74	Odoratin	Estrogen receptor	ESR1
C74	Odoratin	Estrogen receptor beta	ESR2
C74	Odoratin	Glycogen synthase kinase-3 beta	GSK3B
C74	Odoratin	Mitogen-activated protein kinase 14	MAPK14
C74	Odoratin	Nitric oxide synthase, inducible	NOS2
C74	Odoratin	Peroxisome proliferator activated receptor gamma	PPARG
C74	Odoratin	Peroxisome proliferator-activated receptor gamma	PPARG
C74	Odoratin	Prostaglandin G/H synthase 1	PTGS1
C74	Odoratin	Prostaglandin G/H synthase 2	PTGS2
C74	Odoratin	Retinoic acid receptor RXR-alpha	RXRA
C74	Odoratin	Serine/threonine-protein kinase Chk1	CHEK1
C75	Panaxadiol	Glucocorticoid receptor	NR3C1
C76	Phaseol	Androgen receptor	AR
C76	Phaseol	Estrogen receptor	ESR1
C76	Phaseol	Glycogen synthase kinase-3 beta	GSK3B
C76	Phaseol	Mitogen-activated protein kinase 14	MAPK14
C76	Phaseol	Peroxisome proliferator activated receptor gamma	PPARG
C76	Phaseol	Prostaglandin G/H synthase 2	PTGS2
C76	Phaseol	Serine/threonine-protein kinase Chk1	CHEK1
C77	Phaseolinisoflavan	Acetylcholinesterase	ACHE
C77	Phaseolinisoflavan	Androgen receptor	AR
C77	Phaseolinisoflavan	Beta-2 adrenergic receptor	ADRB2
C77	Phaseolinisoflavan	Calmodulin-1	CALM1
C77	Phaseolinisoflavan	Estrogen receptor	ESR1
C77	Phaseolinisoflavan	Estrogen receptor beta	ESR2
C77	Phaseolinisoflavan	Glycogen synthase kinase-3 beta	GSK3B
C77	Phaseolinisoflavan	Mitogen-activated protein kinase 14	MAPK14
C77	Phaseolinisoflavan	Muscarinic acetylcholine receptor M1	CHRM1
C77	Phaseolinisoflavan	Nitric oxide synthase, inducible	NOS2
C77	Phaseolinisoflavan	Peroxisome proliferator activated receptor gamma	PPARG
C77	Phaseolinisoflavan	Prostaglandin G/H synthase 2	PTGS2
C77	Phaseolinisoflavan	Retinoic acid receptor RXR-alpha	RXRA
C77	Phaseolinisoflavan	Serine/threonine-protein kinase Chk1	CHEK1
C78	phytosterol	Oxysterols receptor LXR-alpha	NR1H3
C78	phytosterol	Oxysterols receptor LXR-beta	NR1H2
C78	phytosterol	Steroid 17-alpha-hydroxylase/17,20 lyase	CYP17A1
C78	phytosterol	Sterol regulatory element-binding protein 2	SREBF2
C80	sanjoinenine	Prostaglandin G/H synthase 2	PTGS2
C81	shinpterocarpin	Androgen receptor	AR
C81	shinpterocarpin	Beta-2 adrenergic receptor	ADRB2
C81	shinpterocarpin	Calmodulin-1	CALM1
C81	shinpterocarpin	Delta-type opioid receptor	OPRD1
C81	shinpterocarpin	Estrogen receptor	ESR1
C81	shinpterocarpin	Estrogen receptor beta	ESR2
C81	shinpterocarpin	Glycogen synthase kinase-3 beta	GSK3B
C81	shinpterocarpin	Mitogen-activated protein kinase 14	MAPK14
C81	shinpterocarpin	Muscarinic acetylcholine receptor M1	CHRM1
C81	shinpterocarpin	Neuronal acetylcholine receptor protein, alpha-7 chain	CHRNA7
C81	shinpterocarpin	Nitric oxide synthase, inducible	NOS2
C81	shinpterocarpin	Peroxisome proliferator activated receptor gamma	PPARG
C81	shinpterocarpin	Phosphatidylinositol-4,5-bisphosphate 3-kinase catalytic subunit, gamma isoform	PIK3CG
C81	shinpterocarpin	Prostaglandin G/H synthase 1	PTGS1
C81	shinpterocarpin	Prostaglandin G/H synthase 2	PTGS2
C81	shinpterocarpin	Retinoic acid receptor RXR-alpha	RXRA
C82	sitosterol	Mineralocorticoid receptor	NR3C2
C82	sitosterol	Oxysterols receptor LXR-alpha	NR1H3
C82	sitosterol	Oxysterols receptor LXR-beta	NR1H2
C82	sitosterol	Steroid 17-alpha-hydroxylase/17,20 lyase	CYP17A1
C82	sitosterol	Sterol regulatory element-binding protein 2	SREBF2
C83	Stigmasterol	5-hydroxytryptamine 2A receptor	HTR2A
C83	Stigmasterol	Amine oxidase [flavin-containing] A	MAOA
C83	Stigmasterol	Amine oxidase [flavin-containing] B	MAOB
C83	Stigmasterol	Beta-1 adrenergic receptor	ADRB1
C83	Stigmasterol	Beta-2 adrenergic receptor	ADRB2
C83	Stigmasterol	Mineralocorticoid receptor	NR3C2
C83	Stigmasterol	Muscarinic acetylcholine receptor M1	CHRM1
C83	Stigmasterol	Muscarinic acetylcholine receptor M2	CHRM2
C83	Stigmasterol	Neuronal acetylcholine receptor protein, alpha-7 chain	CHRNA7
C83	Stigmasterol	Oxysterols receptor LXR-alpha	NR1H3
C83	Stigmasterol	Oxysterols receptor LXR-beta	NR1H2
C83	Stigmasterol	Prostaglandin G/H synthase 1	PTGS1
C83	Stigmasterol	Prostaglandin G/H synthase 2	PTGS2
C83	Stigmasterol	Retinoic acid receptor RXR-alpha	RXRA
C83	Stigmasterol	Sodium-dependent dopamine transporter	SLC6A3
C83	Stigmasterol	Sodium-dependent noradrenaline transporter	SLC6A2
C83	Stigmasterol	Steroid 17-alpha-hydroxylase/17,20 lyase	CYP17A1
C83	Stigmasterol	Urokinase-type plasminogen activator	PLAU
C84	suchilactone	Beta-2 adrenergic receptor	ADRB2
C84	suchilactone	Calcium-activated potassium channel subunit alpha 1	KCNMA1
C84	suchilactone	Calmodulin-1	CALM1
C84	suchilactone	Coagulation factor VII	F7
C84	suchilactone	mRNA of Protein-tyrosine phosphatase, non-receptor type 1	PTPN1
C84	suchilactone	Prostaglandin G/H synthase 1	PTGS1
C84	suchilactone	Prostaglandin G/H synthase 2	PTGS2
C84	suchilactone	Retinoic acid receptor RXR-alpha	RXRA
C85	Vestitol	5-hydroxytryptamine 2A receptor	HTR2A
C85	Vestitol	Androgen receptor	AR
C85	Vestitol	Beta-2 adrenergic receptor	ADRB2
C85	Vestitol	Calmodulin-1	CALM1
C85	Vestitol	Dipeptidyl peptidase IV	DPP4
C85	Vestitol	Estrogen receptor	ESR1
C85	Vestitol	Estrogen receptor beta	ESR2
C85	Vestitol	Glycogen synthase kinase-3 beta	GSK3B
C85	Vestitol	Mitogen-activated protein kinase 14	MAPK14
C85	Vestitol	Muscarinic acetylcholine receptor M1	CHRM1
C85	Vestitol	Nitric oxide synthase, inducible	NOS2
C85	Vestitol	Peroxisome proliferator activated receptor gamma	PPARG
C85	Vestitol	Prostaglandin G/H synthase 1	PTGS1
C85	Vestitol	Prostaglandin G/H synthase 2	PTGS2
C85	Vestitol	Retinoic acid receptor RXR-alpha	RXRA
C85	Vestitol	Serine/threonine-protein kinase Chk1	CHEK1
C85	Vestitol	Sodium-dependent dopamine transporter	SLC6A3
C85	Vestitol	Sodium-dependent serotonin transporter	SLC6A4
C86	Xambioona	Calmodulin-1	CALM1
C86	Xambioona	Estrogen receptor	ESR1
C86	Xambioona	Estrogen receptor beta	ESR2
C86	Xambioona	Nitric oxide synthase, inducible	NOS2
C86	Xambioona	Prostaglandin G/H synthase 2	PTGS2
C87	zizyphusine	Acetylcholinesterase	ACHE
C87	zizyphusine	Androgen receptor	AR
C87	zizyphusine	Calcium-activated potassium channel subunit alpha 1	KCNMA1
C87	zizyphusine	Calmodulin-1	CALM1
C87	zizyphusine	Muscarinic acetylcholine receptor M1	CHRM1
C87	zizyphusine	Prostaglandin G/H synthase 1	PTGS1
C87	zizyphusine	Prostaglandin G/H synthase 2	PTGS2
C87	zizyphusine	Retinoic acid receptor RXR-alpha	RXRA
