# Supplementary material for: Qi Fu Yin ameliorates neuroinflammation through inhibiting RAGE and TLR4/NF-κB pathway in AD model rats
Source: Aging (Albany NY). 2023 Nov 22;15(22):13239–64. doi: 10.18632/aging.205238 (PMC10713403; doi:10.18632/aging.205238)
Supplement: Supplementary Table 3 [file aging-15-205238-s004.xlsx]

## Sheet: Sheet1
Supplementary Table 3. Information on the target organ locations, including the heart (66 targets), liver (65 targets), kidney (10 targets), and brain (34 targets).
Targets	Organ
ACHE	liver
ADH1C	liver
ADRB1	liver
AR	liver
CA2	liver
CA5A	liver
CA9	liver
CHRM1	liver
CHRM3	liver
CHRNA2	liver
DHCR7	liver
ESR1	liver
ESR2	liver
F10	liver
F2	liver
GSK3B	liver
HTR2A	liver
HTR3A	liver
KCNMA1	liver
MAOA	liver
MAOB	liver
MAPK14	liver
MMP1	liver
NOS2	liver
NQO1	liver
PDE3A	liver
PGR	liver
PIK3CG	liver
PPARG	liver
PTPN1	liver
RELA	liver
RXRA	liver
SLC6A3	liver
SLC6A4	liver
ABCB1	liver
ACR	liver
ADH1B	liver
ADRA2B	liver
BCHE	liver
C1R	liver
CA7	liver
CACNA2D1	liver
CYP1A1	liver
CYSLTR2	liver
TLR4	liver
TLR7	liver
TLR8	liver
CYP1A2	liver
CYP1B1	liver
CYP3A4	liver
EBP	liver
GLI1	liver
GRIN2A	liver
GUSB	liver
KCNN1	liver
ESRRA	liver
NFKB1	liver
OPRD1	liver
LYPLA2	liver
RAD52	liver
RCE1	liver
SHBG	liver
SLC22A1	liver
THRB	liver
TTR	liver
ADRA2A	brain
CA13	brain
CALM1	brain
CHRM2	brain
GABRA1	brain
GABRA2	brain
GRIA2	brain
LTA4H	brain
MIF	brain
NR3C2	brain
PKIA	brain
ABAT	brain
ABCG2	brain
APP	brain
BACE1	brain
ALDH5A1	brain
CALM2	brain
CALM3	brain
CAMK2A	brain
F3	brain
GLO1	brain
HDAC4	brain
HIF1A	brain
KCNN2	brain
HSP90AA1	brain
HMGCR	brain
GAD2	brain
NFE2L2	brain
XPO1	brain
TUBB3	brain
MAPT	brain
PDE4A	brain
PDE4B	brain
SLC2A1	brain
CA12	kidney
DPP4	kidney
FOS	kidney
PLAU	kidney
AKR1C3	kidney
LACTB	kidney
NQO2	kidney
ODC1	kidney
LYPLA1	kidney
SLC22A12	kidney
ADRA1A	heart
ADRA1B	heart
ADRA1D	heart
ADRA2C	heart
ADRB2	heart
AKR1B1	heart
AKR1B10	heart
CA4	heart
CCNA2	heart
CDK2	heart
CHEK1	heart
CHRM4	heart
CHRNA7	heart
CREB1	heart
DRD1	heart
IL2	heart
KCNH2	heart
MMP2	heart
MMP9	heart
NCOA2	heart
NOS3	heart
PIM1	heart
PRKACA	heart
PTGS1	heart
PTGS2	heart
SCN5A	heart
SLC6A2	heart
TOP2A	heart
AHR	heart
CA3	heart
CA6	heart
CA14	heart
CHRM5	heart
CYSLTR1	heart
DRD4	heart
CA5B	heart
CHRNE	heart
DRD2	heart
ERO1A	heart
GABRA6	heart
GPR183	heart
GSTP1	heart
HSD17B3	heart
IDO1	heart
IMPDH1	heart
IMPDH2	heart
KCNA3	heart
HBA1	heart
GLI2	heart
KLF5	heart
TUBB1	heart
LTB4R	heart
PD3EB	heart
PDE5A	heart
PLAUR	heart
PTAFR	heart
PTGER2	heart
QPCT	heart
QTRT1	heart
RXRB	heart
SCN8A	heart
SENP6	heart
SENP7	heart
SLC16A3	heart
TACR3	heart
TNFRSF1A	heart
