# Supplementary material for: Qi Fu Yin ameliorates neuroinflammation through inhibiting RAGE and TLR4/NF-κB pathway in AD model rats
Source: Aging (Albany NY). 2023 Nov 22;15(22):13239–64. doi: 10.18632/aging.205238 (PMC10713403; doi:10.18632/aging.205238)
Supplement: Supplementary Table 4 [file aging-15-205238-s005.xlsx]

## Sheet: Sheet1
Supplementary Table 4. Protein‒protein interaction (PPI) network cluster module.
Cluster1	#term ID	term description	observed gene count	background gene count	false discovery rate	matching proteins in your network (IDs)	matching proteins in your network (labels)
	hsa05200	Pathways in cancer	14	515	1.32e-11	ENSP00000215832,ENSP00000226574,ENSP00000227507,ENSP00000264657,ENSP00000287820,ENSP00000310928,ENSP00000327251,ENSP00000330237,ENSP00000335153,ENSP00000349467,ENSP00000381185,ENSP00000384273,ENSP00000405330,ENSP00000419692	BCL2,CALM1,CASP9,CCND1,ESR1,HSP90AA1,MAPK1,NFKB1,NOS2,PPARD,PPARG,RELA,RXRA,STAT3
	hsa05145	Toxoplasmosis	9	109	2.98e-11	ENSP00000215832,ENSP00000226574,ENSP00000229795,ENSP00000264657,ENSP00000327251,ENSP00000330237,ENSP00000352121,ENSP00000381185,ENSP00000384273	BCL2,CASP9,MAPK1,MAPK14,NFKB1,NOS2,PIK3CG,RELA,STAT3
	hsa04917	Prolactin signaling pathway	8	69	3.68e-11	ENSP00000215832,ENSP00000226574,ENSP00000227507,ENSP00000229795,ENSP00000264657,ENSP00000358903,ENSP00000384273,ENSP00000405330	CCND1,CYP17A1,ESR1,MAPK1,MAPK14,NFKB1,RELA,STAT3
	hsa04933	AGE-RAGE signaling pathway in diabetic complications	8	98	3.54e-10	ENSP00000215832,ENSP00000226574,ENSP00000227507,ENSP00000229795,ENSP00000264657,ENSP00000297494,ENSP00000381185,ENSP00000384273	BCL2,CCND1,MAPK1,MAPK14,NFKB1,NOS3,RELA,STAT3
	hsa05215	Prostate cancer	8	97	3.54e-10	ENSP00000215832,ENSP00000226574,ENSP00000227507,ENSP00000330237,ENSP00000335153,ENSP00000361850,ENSP00000381185,ENSP00000384273	BCL2,CASP9,CCND1,HSP90AA1,MAPK1,NFKB1,PLAU,RELA
	hsa05167	Kaposi's sarcoma-associated herpesvirus infection	9	183	8.23e-10	ENSP00000215832,ENSP00000226574,ENSP00000227507,ENSP00000229795,ENSP00000264657,ENSP00000330237,ENSP00000349467,ENSP00000352121,ENSP00000384273	CALM1,CASP9,CCND1,MAPK1,MAPK14,NFKB1,PIK3CG,RELA,STAT3
	hsa05418	Fluid shear stress and atherosclerosis	8	133	2.2e-09	ENSP00000226574,ENSP00000229795,ENSP00000289473,ENSP00000297494,ENSP00000335153,ENSP00000349467,ENSP00000381185,ENSP00000384273	BCL2,CALM1,HSP90AA1,MAPK14,NCF1,NFKB1,NOS3,RELA
	hsa04151	PI3K-Akt signaling pathway	10	348	6.84e-09	ENSP00000215832,ENSP00000226574,ENSP00000227507,ENSP00000297494,ENSP00000330237,ENSP00000335153,ENSP00000352121,ENSP00000381185,ENSP00000384273,ENSP00000419692	BCL2,CASP9,CCND1,HSP90AA1,MAPK1,NFKB1,NOS3,PIK3CG,RELA,RXRA
	hsa05222	Small cell lung cancer	7	92	6.84e-09	ENSP00000226574,ENSP00000227507,ENSP00000327251,ENSP00000330237,ENSP00000381185,ENSP00000384273,ENSP00000419692	BCL2,CASP9,CCND1,NFKB1,NOS2,RELA,RXRA
	hsa04066	HIF-1 signaling pathway	7	98	8.35e-09	ENSP00000215832,ENSP00000226574,ENSP00000264657,ENSP00000297494,ENSP00000327251,ENSP00000381185,ENSP00000384273	BCL2,MAPK1,NFKB1,NOS2,NOS3,RELA,STAT3
	hsa05010	Alzheimer's disease	8	168	8.35e-09	ENSP00000215832,ENSP00000284981,ENSP00000318486,ENSP00000318585,ENSP00000330237,ENSP00000340820,ENSP00000349467,ENSP00000419782	APP,BACE1,CALM1,CASP9,CDK5,CDK5R1,MAPK1,MAPT
	hsa04659	Th17 cell differentiation	7	102	9.03e-09	ENSP00000215832,ENSP00000226574,ENSP00000229795,ENSP00000264657,ENSP00000335153,ENSP00000384273,ENSP00000419692	HSP90AA1,MAPK1,MAPK14,NFKB1,RELA,RXRA,STAT3
	hsa05152	Tuberculosis	8	172	9.03e-09	ENSP00000215832,ENSP00000226574,ENSP00000229795,ENSP00000327251,ENSP00000330237,ENSP00000349467,ENSP00000381185,ENSP00000384273	BCL2,CALM1,CASP9,MAPK1,MAPK14,NFKB1,NOS2,RELA
	hsa05221	Acute myeloid leukemia	6	66	2.97e-08	ENSP00000215832,ENSP00000226574,ENSP00000227507,ENSP00000264657,ENSP00000310928,ENSP00000384273	CCND1,MAPK1,NFKB1,PPARD,RELA,STAT3
	hsa05140	Leishmaniasis	6	70	3.86e-08	ENSP00000215832,ENSP00000226574,ENSP00000229795,ENSP00000289473,ENSP00000327251,ENSP00000384273	MAPK1,MAPK14,NCF1,NFKB1,NOS2,RELA
	hsa05133	Pertussis	6	74	4.95e-08	ENSP00000215832,ENSP00000226574,ENSP00000229795,ENSP00000327251,ENSP00000349467,ENSP00000384273	CALM1,MAPK1,MAPK14,NFKB1,NOS2,RELA
	hsa05212	Pancreatic cancer	6	74	4.95e-08	ENSP00000215832,ENSP00000226574,ENSP00000227507,ENSP00000264657,ENSP00000330237,ENSP00000384273	CASP9,CCND1,MAPK1,NFKB1,RELA,STAT3
	hsa05161	Hepatitis B	7	142	5.42e-08	ENSP00000215832,ENSP00000226574,ENSP00000227507,ENSP00000264657,ENSP00000330237,ENSP00000381185,ENSP00000384273	BCL2,CASP9,CCND1,MAPK1,NFKB1,RELA,STAT3
	hsa05030	Cocaine addiction	5	49	3.06e-07	ENSP00000226574,ENSP00000318486,ENSP00000354859,ENSP00000384273,ENSP00000419782	CDK5,CDK5R1,DRD2,NFKB1,RELA
	hsa04071	Sphingolipid signaling pathway	6	116	5.06e-07	ENSP00000215832,ENSP00000226574,ENSP00000229795,ENSP00000297494,ENSP00000381185,ENSP00000384273	BCL2,MAPK1,MAPK14,NFKB1,NOS3,RELA
	hsa04722	Neurotrophin signaling pathway	6	116	5.06e-07	ENSP00000215832,ENSP00000226574,ENSP00000229795,ENSP00000349467,ENSP00000381185,ENSP00000384273	BCL2,CALM1,MAPK1,MAPK14,NFKB1,RELA
	hsa04380	Osteoclast differentiation	6	124	6.73e-07	ENSP00000215832,ENSP00000226574,ENSP00000229795,ENSP00000287820,ENSP00000289473,ENSP00000384273	MAPK1,MAPK14,NCF1,NFKB1,PPARG,RELA
	hsa04926	Relaxin signaling pathway	6	130	8.41e-07	ENSP00000215832,ENSP00000226574,ENSP00000229795,ENSP00000297494,ENSP00000327251,ENSP00000384273	MAPK1,MAPK14,NFKB1,NOS2,NOS3,RELA
	hsa05160	Hepatitis C	6	131	8.42e-07	ENSP00000215832,ENSP00000226574,ENSP00000229795,ENSP00000264657,ENSP00000384273,ENSP00000419692	MAPK1,MAPK14,NFKB1,RELA,RXRA,STAT3
	hsa04371	Apelin signaling pathway	6	133	8.81e-07	ENSP00000215832,ENSP00000227507,ENSP00000297494,ENSP00000327251,ENSP00000349467,ENSP00000352121	CALM1,CCND1,MAPK1,NOS2,NOS3,PIK3CG
	hsa04915	Estrogen signaling pathway	6	133	8.81e-07	ENSP00000215832,ENSP00000297494,ENSP00000335153,ENSP00000349467,ENSP00000381185,ENSP00000405330	BCL2,CALM1,ESR1,HSP90AA1,MAPK1,NOS3
	hsa05223	Non-small cell lung cancer	5	66	8.81e-07	ENSP00000215832,ENSP00000227507,ENSP00000264657,ENSP00000330237,ENSP00000419692	CASP9,CCND1,MAPK1,RXRA,STAT3
	hsa03320	PPAR signaling pathway	5	72	1.26e-06	ENSP00000287820,ENSP00000309124,ENSP00000310928,ENSP00000362817,ENSP00000419692	FABP3,OLR1,PPARD,PPARG,RXRA
	hsa05206	MicroRNAs in cancer	6	149	1.45e-06	ENSP00000215832,ENSP00000226574,ENSP00000227507,ENSP00000264657,ENSP00000361850,ENSP00000381185	BCL2,CCND1,MAPK1,NFKB1,PLAU,STAT3
	hsa04218	Cellular senescence	6	156	1.82e-06	ENSP00000215832,ENSP00000226574,ENSP00000227507,ENSP00000229795,ENSP00000349467,ENSP00000384273	CALM1,CCND1,MAPK1,MAPK14,NFKB1,RELA
	hsa05132	Salmonella infection	5	84	2.36e-06	ENSP00000215832,ENSP00000226574,ENSP00000229795,ENSP00000327251,ENSP00000384273	MAPK1,MAPK14,NFKB1,NOS2,RELA
	hsa04621	NOD-like receptor signaling pathway	6	166	2.42e-06	ENSP00000215832,ENSP00000226574,ENSP00000229795,ENSP00000335153,ENSP00000381185,ENSP00000384273	BCL2,HSP90AA1,MAPK1,MAPK14,NFKB1,RELA
	hsa04657	IL-17 signaling pathway	5	92	3.4e-06	ENSP00000215832,ENSP00000226574,ENSP00000229795,ENSP00000335153,ENSP00000384273	HSP90AA1,MAPK1,MAPK14,NFKB1,RELA
	hsa05216	Thyroid cancer	4	37	3.63e-06	ENSP00000215832,ENSP00000227507,ENSP00000287820,ENSP00000419692	CCND1,MAPK1,PPARG,RXRA
	hsa01522	Endocrine resistance	5	95	3.73e-06	ENSP00000215832,ENSP00000227507,ENSP00000229795,ENSP00000381185,ENSP00000405330	BCL2,CCND1,ESR1,MAPK1,MAPK14
	hsa05142	Chagas disease (American trypanosomiasis)	5	101	4.85e-06	ENSP00000215832,ENSP00000226574,ENSP00000229795,ENSP00000327251,ENSP00000384273	MAPK1,MAPK14,NFKB1,NOS2,RELA
	hsa05205	Proteoglycans in cancer	6	195	5.22e-06	ENSP00000215832,ENSP00000227507,ENSP00000229795,ENSP00000264657,ENSP00000361850,ENSP00000405330	CCND1,ESR1,MAPK1,MAPK14,PLAU,STAT3
	hsa04919	Thyroid hormone signaling pathway	5	115	8.49e-06	ENSP00000215832,ENSP00000227507,ENSP00000330237,ENSP00000405330,ENSP00000419692	CASP9,CCND1,ESR1,MAPK1,RXRA
	hsa04210	Apoptosis	5	135	1.77e-05	ENSP00000215832,ENSP00000226574,ENSP00000330237,ENSP00000381185,ENSP00000384273	BCL2,CASP9,MAPK1,NFKB1,RELA
	hsa04370	VEGF signaling pathway	4	59	1.77e-05	ENSP00000215832,ENSP00000229795,ENSP00000297494,ENSP00000330237	CASP9,MAPK1,MAPK14,NOS3
	hsa04261	Adrenergic signaling in cardiomyocytes	5	139	1.93e-05	ENSP00000215832,ENSP00000229795,ENSP00000349467,ENSP00000352121,ENSP00000381185	BCL2,CALM1,MAPK1,MAPK14,PIK3CG
	hsa05131	Shigellosis	4	63	2.15e-05	ENSP00000215832,ENSP00000226574,ENSP00000229795,ENSP00000384273	MAPK1,MAPK14,NFKB1,RELA
	hsa04921	Oxytocin signaling pathway	5	149	2.55e-05	ENSP00000215832,ENSP00000227507,ENSP00000297494,ENSP00000349467,ENSP00000352121	CALM1,CCND1,MAPK1,NOS3,PIK3CG
	hsa04920	Adipocytokine signaling pathway	4	69	2.9e-05	ENSP00000226574,ENSP00000264657,ENSP00000384273,ENSP00000419692	NFKB1,RELA,RXRA,STAT3
	hsa04022	cGMP-PKG signaling pathway	5	160	3.41e-05	ENSP00000215832,ENSP00000286628,ENSP00000297494,ENSP00000349467,ENSP00000352121	CALM1,KCNMA1,MAPK1,NOS3,PIK3CG
	hsa05220	Chronic myeloid leukemia	4	76	3.99e-05	ENSP00000215832,ENSP00000226574,ENSP00000227507,ENSP00000384273	CCND1,MAPK1,NFKB1,RELA
	hsa05164	Influenza A	5	168	4.11e-05	ENSP00000215832,ENSP00000226574,ENSP00000229795,ENSP00000330237,ENSP00000384273	CASP9,MAPK1,MAPK14,NFKB1,RELA
	hsa05202	Transcriptional misregulation in cancer	5	169	4.14e-05	ENSP00000226574,ENSP00000287820,ENSP00000361850,ENSP00000384273,ENSP00000419692	NFKB1,PLAU,PPARG,RELA,RXRA
	hsa04062	Chemokine signaling pathway	5	181	5.6e-05	ENSP00000215832,ENSP00000226574,ENSP00000264657,ENSP00000289473,ENSP00000384273	MAPK1,NCF1,NFKB1,RELA,STAT3
	hsa05210	Colorectal cancer	4	85	5.61e-05	ENSP00000215832,ENSP00000227507,ENSP00000330237,ENSP00000381185	BCL2,CASP9,CCND1,MAPK1
	hsa05203	Viral carcinogenesis	5	183	5.66e-05	ENSP00000215832,ENSP00000226574,ENSP00000227507,ENSP00000264657,ENSP00000384273	CCND1,MAPK1,NFKB1,RELA,STAT3
	hsa04658	Th1 and Th2 cell differentiation	4	88	6.15e-05	ENSP00000215832,ENSP00000226574,ENSP00000229795,ENSP00000384273	MAPK1,MAPK14,NFKB1,RELA
	hsa05169	Epstein-Barr virus infection	5	194	7.17e-05	ENSP00000226574,ENSP00000229795,ENSP00000264657,ENSP00000381185,ENSP00000384273	BCL2,MAPK14,NFKB1,RELA,STAT3
	hsa04024	cAMP signaling pathway	5	195	7.2e-05	ENSP00000215832,ENSP00000226574,ENSP00000349467,ENSP00000354859,ENSP00000384273	CALM1,DRD2,MAPK1,NFKB1,RELA
	hsa04064	NF-kappa B signaling pathway	4	93	7.2e-05	ENSP00000226574,ENSP00000361850,ENSP00000381185,ENSP00000384273	BCL2,NFKB1,PLAU,RELA
	hsa04660	T cell receptor signaling pathway	4	99	8.92e-05	ENSP00000215832,ENSP00000226574,ENSP00000229795,ENSP00000384273	MAPK1,MAPK14,NFKB1,RELA
	hsa04620	Toll-like receptor signaling pathway	4	102	9.81e-05	ENSP00000215832,ENSP00000226574,ENSP00000229795,ENSP00000384273	MAPK1,MAPK14,NFKB1,RELA
	hsa04668	TNF signaling pathway	4	108	0.00012	ENSP00000215832,ENSP00000226574,ENSP00000229795,ENSP00000384273	MAPK1,MAPK14,NFKB1,RELA
	hsa04931	Insulin resistance	4	107	0.00012	ENSP00000226574,ENSP00000264657,ENSP00000297494,ENSP00000384273	NFKB1,NOS3,RELA,STAT3
	hsa04611	Platelet activation	4	123	0.00019	ENSP00000215832,ENSP00000229795,ENSP00000297494,ENSP00000352121	MAPK1,MAPK14,NOS3,PIK3CG
	hsa04068	FoxO signaling pathway	4	130	0.00023	ENSP00000215832,ENSP00000227507,ENSP00000229795,ENSP00000264657	CCND1,MAPK1,MAPK14,STAT3
	hsa05162	Measles	4	133	0.00025	ENSP00000226574,ENSP00000227507,ENSP00000264657,ENSP00000384273	CCND1,NFKB1,RELA,STAT3
	hsa05014	Amyotrophic lateral sclerosis (ALS)	3	50	0.00028	ENSP00000229795,ENSP00000330237,ENSP00000381185	BCL2,CASP9,MAPK14
	hsa05134	Legionellosis	3	54	0.00035	ENSP00000226574,ENSP00000330237,ENSP00000384273	CASP9,NFKB1,RELA
	hsa05226	Gastric cancer	4	147	0.00035	ENSP00000215832,ENSP00000227507,ENSP00000381185,ENSP00000419692	BCL2,CCND1,MAPK1,RXRA
	hsa04010	MAPK signaling pathway	5	293	0.00039	ENSP00000215832,ENSP00000226574,ENSP00000229795,ENSP00000340820,ENSP00000384273	MAPK1,MAPK14,MAPT,NFKB1,RELA
	hsa05213	Endometrial cancer	3	58	0.0004	ENSP00000215832,ENSP00000227507,ENSP00000330237	CASP9,CCND1,MAPK1
	hsa05321	Inflammatory bowel disease (IBD)	3	62	0.00048	ENSP00000226574,ENSP00000264657,ENSP00000384273	NFKB1,RELA,STAT3
	hsa05120	Epithelial cell signaling in Helicobacter pylori infection	3	66	0.00057	ENSP00000226574,ENSP00000229795,ENSP00000384273	MAPK14,NFKB1,RELA
	hsa05214	Glioma	3	68	0.00061	ENSP00000215832,ENSP00000227507,ENSP00000349467	CALM1,CCND1,MAPK1
	hsa01524	Platinum drug resistance	3	70	0.00065	ENSP00000215832,ENSP00000330237,ENSP00000381185	BCL2,CASP9,MAPK1
	hsa04622	RIG-I-like receptor signaling pathway	3	70	0.00065	ENSP00000226574,ENSP00000229795,ENSP00000384273	MAPK14,NFKB1,RELA
	hsa04662	B cell receptor signaling pathway	3	71	0.00066	ENSP00000215832,ENSP00000226574,ENSP00000384273	MAPK1,NFKB1,RELA
	hsa01521	EGFR tyrosine kinase inhibitor resistance	3	78	0.00085	ENSP00000215832,ENSP00000264657,ENSP00000381185	BCL2,MAPK1,STAT3
	hsa04015	Rap1 signaling pathway	4	203	0.00099	ENSP00000215832,ENSP00000229795,ENSP00000349467,ENSP00000354859	CALM1,DRD2,MAPK1,MAPK14
	hsa04211	Longevity regulating pathway	3	88	0.0012	ENSP00000226574,ENSP00000287820,ENSP00000384273	NFKB1,PPARG,RELA
	hsa04912	GnRH signaling pathway	3	88	0.0012	ENSP00000215832,ENSP00000229795,ENSP00000349467	CALM1,MAPK1,MAPK14
	hsa00220	Arginine biosynthesis	2	20	0.0014	ENSP00000297494,ENSP00000327251	NOS2,NOS3
	hsa04014	Ras signaling pathway	4	228	0.0014	ENSP00000215832,ENSP00000226574,ENSP00000349467,ENSP00000384273	CALM1,MAPK1,NFKB1,RELA
	hsa04914	Progesterone-mediated oocyte maturation	3	94	0.0014	ENSP00000215832,ENSP00000229795,ENSP00000335153	HSP90AA1,MAPK1,MAPK14
	hsa05146	Amoebiasis	3	94	0.0014	ENSP00000226574,ENSP00000327251,ENSP00000384273	NFKB1,NOS2,RELA
	hsa04725	Cholinergic synapse	3	111	0.0021	ENSP00000215832,ENSP00000352121,ENSP00000381185	BCL2,MAPK1,PIK3CG
	hsa04726	Serotonergic synapse	3	112	0.0021	ENSP00000215832,ENSP00000261707,ENSP00000284981	APP,MAPK1,SLC6A4
	hsa04152	AMPK signaling pathway	3	120	0.0025	ENSP00000227507,ENSP00000287820,ENSP00000287936	CCND1,HMGCR,PPARG
	hsa04270	Vascular smooth muscle contraction	3	119	0.0025	ENSP00000215832,ENSP00000286628,ENSP00000349467	CALM1,KCNMA1,MAPK1
	hsa01523	Antifolate resistance	2	31	0.0029	ENSP00000226574,ENSP00000384273	NFKB1,RELA
	hsa04215	Apoptosis - multiple species	2	31	0.0029	ENSP00000330237,ENSP00000381185	BCL2,CASP9
	hsa04728	Dopaminergic synapse	3	128	0.0029	ENSP00000229795,ENSP00000349467,ENSP00000354859	CALM1,DRD2,MAPK14
	hsa04550	Signaling pathways regulating pluripotency of stem cells	3	138	0.0035	ENSP00000215832,ENSP00000229795,ENSP00000264657	MAPK1,MAPK14,STAT3
	hsa05034	Alcoholism	3	142	0.0038	ENSP00000215832,ENSP00000349467,ENSP00000354859	CALM1,DRD2,MAPK1
	hsa04723	Retrograde endocannabinoid signaling	3	148	0.0041	ENSP00000215832,ENSP00000229795,ENSP00000243167	FAAH,MAPK1,MAPK14
	hsa04932	Non-alcoholic fatty liver disease (NAFLD)	3	149	0.0041	ENSP00000226574,ENSP00000384273,ENSP00000419692	NFKB1,RELA,RXRA
	hsa05165	Human papillomavirus infection	4	317	0.0041	ENSP00000215832,ENSP00000226574,ENSP00000227507,ENSP00000384273	CCND1,MAPK1,NFKB1,RELA
	hsa05224	Breast cancer	3	147	0.0041	ENSP00000215832,ENSP00000227507,ENSP00000405330	CCND1,ESR1,MAPK1
	hsa04934	Cushing's syndrome	3	153	0.0044	ENSP00000215832,ENSP00000227507,ENSP00000358903	CCND1,CYP17A1,MAPK1
	hsa05219	Bladder cancer	2	41	0.0044	ENSP00000215832,ENSP00000227507	CCND1,MAPK1
	hsa04217	Necroptosis	3	155	0.0045	ENSP00000264657,ENSP00000335153,ENSP00000381185	BCL2,HSP90AA1,STAT3
	hsa04630	Jak-STAT signaling pathway	3	160	0.0048	ENSP00000227507,ENSP00000264657,ENSP00000381185	BCL2,CCND1,STAT3
	hsa04340	Hedgehog signaling pathway	2	46	0.0053	ENSP00000227507,ENSP00000381185	BCL2,CCND1
	hsa00330	Arginine and proline metabolism	2	48	0.0057	ENSP00000297494,ENSP00000327251	NOS2,NOS3
	hsa04020	Calcium signaling pathway	3	179	0.0064	ENSP00000297494,ENSP00000327251,ENSP00000349467	CALM1,NOS2,NOS3
	hsa05416	Viral myocarditis	2	56	0.0075	ENSP00000227507,ENSP00000330237	CASP9,CCND1
	hsa04510	Focal adhesion	3	197	0.0081	ENSP00000215832,ENSP00000227507,ENSP00000381185	BCL2,CCND1,MAPK1
	hsa04623	Cytosolic DNA-sensing pathway	2	62	0.0089	ENSP00000226574,ENSP00000384273	NFKB1,RELA
	hsa04924	Renin secretion	2	63	0.0091	ENSP00000286628,ENSP00000349467	CALM1,KCNMA1
	hsa04720	Long-term potentiation	2	64	0.0093	ENSP00000215832,ENSP00000349467	CALM1,MAPK1
	hsa04664	Fc epsilon RI signaling pathway	2	67	0.0101	ENSP00000215832,ENSP00000229795	MAPK1,MAPK14
	hsa04115	p53 signaling pathway	2	68	0.0103	ENSP00000227507,ENSP00000330237	CASP9,CCND1
	hsa04976	Bile secretion	2	71	0.011	ENSP00000287936,ENSP00000419692	HMGCR,RXRA
	hsa05218	Melanoma	2	72	0.0112	ENSP00000215832,ENSP00000227507	CCND1,MAPK1
	hsa05166	HTLV-I infection	3	250	0.0144	ENSP00000226574,ENSP00000227507,ENSP00000384273	CCND1,NFKB1,RELA
	hsa04970	Salivary secretion	2	86	0.0154	ENSP00000286628,ENSP00000349467	CALM1,KCNMA1
	hsa04540	Gap junction	2	87	0.0156	ENSP00000215832,ENSP00000354859	DRD2,MAPK1
	hsa04666	Fc gamma R-mediated phagocytosis	2	89	0.0161	ENSP00000215832,ENSP00000289473	MAPK1,NCF1
	hsa04750	Inflammatory mediator regulation of TRP channels	2	92	0.017	ENSP00000229795,ENSP00000349467	CALM1,MAPK14
	hsa04713	Circadian entrainment	2	93	0.0172	ENSP00000215832,ENSP00000349467	CALM1,MAPK1
	hsa04916	Melanogenesis	2	98	0.0188	ENSP00000215832,ENSP00000349467	CALM1,MAPK1
	hsa04670	Leukocyte transendothelial migration	2	112	0.0239	ENSP00000229795,ENSP00000289473	MAPK14,NCF1
	hsa04114	Oocyte meiosis	2	116	0.0253	ENSP00000215832,ENSP00000349467	CALM1,MAPK1
	hsa04140	Autophagy - animal	2	125	0.0287	ENSP00000215832,ENSP00000381185	BCL2,MAPK1
	hsa04910	Insulin signaling pathway	2	134	0.0324	ENSP00000215832,ENSP00000349467	CALM1,MAPK1
	hsa05012	Parkinson's disease	2	142	0.0357	ENSP00000330237,ENSP00000354859	CASP9,DRD2
	hsa04310	Wnt signaling pathway	2	143	0.0359	ENSP00000227507,ENSP00000310928	CCND1,PPARD
	hsa04072	Phospholipase D signaling pathway	2	145	0.0365	ENSP00000215832,ENSP00000352121	MAPK1,PIK3CG
	hsa04145	Phagosome	2	145	0.0365	ENSP00000289473,ENSP00000309124	NCF1,OLR1
	hsa04141	Protein processing in endoplasmic reticulum	2	161	0.0435	ENSP00000335153,ENSP00000381185	BCL2,HSP90AA1
	hsa05225	Hepatocellular carcinoma	2	163	0.0441	ENSP00000215832,ENSP00000227507	CCND1,MAPK1
	hsa04360	Axon guidance	2	173	0.0487	ENSP00000215832,ENSP00000419782	CDK5,MAPK1
Cluster2
	#term ID	term description	observed gene count	background gene count	false discovery rate	matching proteins in your network (IDs)	matching proteins in your network (labels)
	hsa04080	Neuroactive ligand-receptor interaction	11	272	5.6e-12	ENSP00000234961,ENSP00000280155,ENSP00000305372,ENSP00000306490,ENSP00000354859,ENSP00000358301,ENSP00000358513,ENSP00000363596,ENSP00000377353,ENSP00000399745,ENSP00000407546	ADRA2A,ADRB1,ADRB2,CHRM1,CHRM2,CHRNA7,CNR1,CNR2,DRD1,DRD2,OPRD1
	hsa04726	Serotonergic synapse	8	112	1.51e-10	ENSP00000251535,ENSP00000261707,ENSP00000340684,ENSP00000354612,ENSP00000356436,ENSP00000363512,ENSP00000367309,ENSP00000458832	ALOX12,ALOX15,ALOX5,MAOA,MAOB,PLA2G4A,PTGS1,SLC6A4
	hsa05030	Cocaine addiction	5	49	2.83e-07	ENSP00000270349,ENSP00000340684,ENSP00000354859,ENSP00000367309,ENSP00000377353	DRD1,DRD2,MAOA,MAOB,SLC6A3
	hsa00590	Arachidonic acid metabolism	5	61	5.93e-07	ENSP00000251535,ENSP00000354612,ENSP00000356436,ENSP00000363512,ENSP00000458832	ALOX12,ALOX15,ALOX5,PLA2G4A,PTGS1
	hsa04020	Calcium signaling pathway	6	179	2.86e-06	ENSP00000305372,ENSP00000306490,ENSP00000358301,ENSP00000377353,ENSP00000399745,ENSP00000407546	ADRB1,ADRB2,CHRM1,CHRM2,CHRNA7,DRD1
	hsa04024	cAMP signaling pathway	6	195	3.88e-06	ENSP00000305372,ENSP00000306490,ENSP00000354859,ENSP00000358301,ENSP00000377353,ENSP00000399745	ADRB1,ADRB2,CHRM1,CHRM2,DRD1,DRD2
	hsa04725	Cholinergic synapse	5	111	5.79e-06	ENSP00000303211,ENSP00000306490,ENSP00000352121,ENSP00000399745,ENSP00000407546	ACHE,CHRM1,CHRM2,CHRNA7,PIK3CG
	hsa04728	Dopaminergic synapse	5	128	9.99e-06	ENSP00000270349,ENSP00000340684,ENSP00000354859,ENSP00000367309,ENSP00000377353	DRD1,DRD2,MAOA,MAOB,SLC6A3
	hsa04923	Regulation of lipolysis in adipocytes	4	53	9.99e-06	ENSP00000265052,ENSP00000305372,ENSP00000354612,ENSP00000358301	ADRB1,ADRB2,MGLL,PTGS1
	hsa05034	Alcoholism	5	142	1.31e-05	ENSP00000270349,ENSP00000340684,ENSP00000354859,ENSP00000367309,ENSP00000377353	DRD1,DRD2,MAOA,MAOB,SLC6A3
	hsa05031	Amphetamine addiction	4	65	1.7e-05	ENSP00000270349,ENSP00000340684,ENSP00000367309,ENSP00000377353	DRD1,MAOA,MAOB,SLC6A3
	hsa04022	cGMP-PKG signaling pathway	5	160	1.93e-05	ENSP00000234961,ENSP00000280155,ENSP00000305372,ENSP00000352121,ENSP00000358301	ADRA2A,ADRB1,ADRB2,OPRD1,PIK3CG
	hsa00340	Histidine metabolism	3	23	3.53e-05	ENSP00000261733,ENSP00000340684,ENSP00000367309	ALDH2,MAOA,MAOB
	hsa00380	Tryptophan metabolism	3	40	0.00015	ENSP00000261733,ENSP00000340684,ENSP00000367309	ALDH2,MAOA,MAOB
	hsa01100	Metabolic pathways	9	1250	0.00019	ENSP00000251535,ENSP00000261733,ENSP00000265052,ENSP00000340684,ENSP00000354612,ENSP00000356436,ENSP00000363512,ENSP00000367309,ENSP00000458832	ALDH2,ALOX12,ALOX15,ALOX5,MAOA,MAOB,MGLL,PLA2G4A,PTGS1
	hsa00330	Arginine and proline metabolism	3	48	0.00022	ENSP00000261733,ENSP00000340684,ENSP00000367309	ALDH2,MAOA,MAOB
	hsa04540	Gap junction	3	87	0.0011	ENSP00000354859,ENSP00000358301,ENSP00000377353	ADRB1,DRD1,DRD2
	hsa00360	Phenylalanine metabolism	2	17	0.0013	ENSP00000340684,ENSP00000367309	MAOA,MAOB
	hsa04611	Platelet activation	3	123	0.0027	ENSP00000352121,ENSP00000354612,ENSP00000356436	PIK3CG,PLA2G4A,PTGS1
	hsa00591	Linoleic acid metabolism	2	29	0.0031	ENSP00000356436,ENSP00000458832	ALOX15,PLA2G4A
	hsa04261	Adrenergic signaling in cardiomyocytes	3	139	0.0035	ENSP00000305372,ENSP00000352121,ENSP00000358301	ADRB1,ADRB2,PIK3CG
	hsa05012	Parkinson's disease	3	142	0.0036	ENSP00000270349,ENSP00000354859,ENSP00000377353	DRD1,DRD2,SLC6A3
	hsa04723	Retrograde endocannabinoid signaling	3	148	0.0038	ENSP00000243167,ENSP00000265052,ENSP00000358513	CNR1,FAAH,MGLL
	hsa00350	Tyrosine metabolism	2	36	0.0039	ENSP00000340684,ENSP00000367309	MAOA,MAOB
	hsa00260	Glycine, serine and threonine metabolism	2	39	0.0043	ENSP00000340684,ENSP00000367309	MAOA,MAOB
	hsa04913	Ovarian steroidogenesis	2	49	0.0064	ENSP00000356436,ENSP00000363512	ALOX5,PLA2G4A
	hsa00561	Glycerolipid metabolism	2	59	0.0087	ENSP00000261733,ENSP00000265052	ALDH2,MGLL
	hsa04924	Renin secretion	2	63	0.0095	ENSP00000305372,ENSP00000358301	ADRB1,ADRB2
	hsa00982	Drug metabolism - cytochrome P450	2	66	0.0101	ENSP00000340684,ENSP00000367309	MAOA,MAOB
	hsa04664	Fc epsilon RI signaling pathway	2	67	0.0101	ENSP00000356436,ENSP00000363512	ALOX5,PLA2G4A
	hsa04970	Salivary secretion	2	86	0.0156	ENSP00000305372,ENSP00000358301	ADRB1,ADRB2
	hsa04750	Inflammatory mediator regulation of TRP channels	2	92	0.0171	ENSP00000251535,ENSP00000356436	ALOX12,PLA2G4A
	hsa00564	Glycerophospholipid metabolism	2	96	0.018	ENSP00000303211,ENSP00000356436	ACHE,PLA2G4A
	hsa05145	Toxoplasmosis	2	109	0.0222	ENSP00000352121,ENSP00000363512	ALOX5,PIK3CG
	hsa04151	PI3K-Akt signaling pathway	3	348	0.0264	ENSP00000306490,ENSP00000352121,ENSP00000399745	CHRM1,CHRM2,PIK3CG
	hsa04072	Phospholipase D signaling pathway	2	145	0.0356	ENSP00000352121,ENSP00000356436	PIK3CG,PLA2G4A
	hsa04921	Oxytocin signaling pathway	2	149	0.0365	ENSP00000352121,ENSP00000356436	PIK3CG,PLA2G4A
	hsa04217	Necroptosis	2	155	0.0382	ENSP00000356436,ENSP00000458832	ALOX15,PLA2G4A
Cluster3
	#term ID	term description	observed gene count	background gene count	false discovery rate	matching proteins in your network (IDs)	matching proteins in your network (labels)
	hsa04080	Neuroactive ligand-receptor interaction	11	272	2.61e-11	ENSP00000276198,ENSP00000289753,ENSP00000296526,ENSP00000305372,ENSP00000306490,ENSP00000354859,ENSP00000358301,ENSP00000358513,ENSP00000377353,ENSP00000407546,ENSP00000437737	ADRB1,ADRB2,CHRM1,CHRNA7,CNR1,DRD1,DRD2,GRIA2,HTR2A,HTR2C,HTR6
	hsa05030	Cocaine addiction	7	49	1.12e-10	ENSP00000270349,ENSP00000296526,ENSP00000318486,ENSP00000340684,ENSP00000354859,ENSP00000367309,ENSP00000377353	CDK5R1,DRD1,DRD2,GRIA2,MAOA,MAOB,SLC6A3
	hsa04020	Calcium signaling pathway	9	179	2.7e-10	ENSP00000276198,ENSP00000289753,ENSP00000305372,ENSP00000306490,ENSP00000349467,ENSP00000358301,ENSP00000377353,ENSP00000407546,ENSP00000437737	ADRB1,ADRB2,CALM1,CHRM1,CHRNA7,DRD1,HTR2A,HTR2C,HTR6
	hsa04024	cAMP signaling pathway	8	195	1.58e-08	ENSP00000289753,ENSP00000296526,ENSP00000305372,ENSP00000306490,ENSP00000349467,ENSP00000354859,ENSP00000358301,ENSP00000377353	ADRB1,ADRB2,CALM1,CHRM1,DRD1,DRD2,GRIA2,HTR6
	hsa04728	Dopaminergic synapse	7	128	2.12e-08	ENSP00000270349,ENSP00000296526,ENSP00000340684,ENSP00000349467,ENSP00000354859,ENSP00000367309,ENSP00000377353	CALM1,DRD1,DRD2,GRIA2,MAOA,MAOB,SLC6A3
	hsa05031	Amphetamine addiction	6	65	2.12e-08	ENSP00000270349,ENSP00000296526,ENSP00000340684,ENSP00000349467,ENSP00000367309,ENSP00000377353	CALM1,DRD1,GRIA2,MAOA,MAOB,SLC6A3
	hsa04726	Serotonergic synapse	6	112	3.31e-07	ENSP00000261707,ENSP00000276198,ENSP00000289753,ENSP00000340684,ENSP00000367309,ENSP00000437737	HTR2A,HTR2C,HTR6,MAOA,MAOB,SLC6A4
	hsa05034	Alcoholism	6	142	1.12e-06	ENSP00000270349,ENSP00000340684,ENSP00000349467,ENSP00000354859,ENSP00000367309,ENSP00000377353	CALM1,DRD1,DRD2,MAOA,MAOB,SLC6A3
	hsa04540	Gap junction	5	87	2.98e-06	ENSP00000276198,ENSP00000354859,ENSP00000358301,ENSP00000377353,ENSP00000437737	ADRB1,DRD1,DRD2,HTR2A,HTR2C
	hsa00380	Tryptophan metabolism	4	40	5.65e-06	ENSP00000261733,ENSP00000340684,ENSP00000342007,ENSP00000367309	ALDH2,CYP1A2,MAOA,MAOB
	hsa04924	Renin secretion	4	63	2.83e-05	ENSP00000286628,ENSP00000305372,ENSP00000349467,ENSP00000358301	ADRB1,ADRB2,CALM1,KCNMA1
	hsa00340	Histidine metabolism	3	23	6.44e-05	ENSP00000261733,ENSP00000340684,ENSP00000367309	ALDH2,MAOA,MAOB
	hsa04970	Salivary secretion	4	86	7.78e-05	ENSP00000286628,ENSP00000305372,ENSP00000349467,ENSP00000358301	ADRB1,ADRB2,CALM1,KCNMA1
	hsa00330	Arginine and proline metabolism	3	48	0.00043	ENSP00000261733,ENSP00000340684,ENSP00000367309	ALDH2,MAOA,MAOB
	hsa04723	Retrograde endocannabinoid signaling	4	148	0.00053	ENSP00000243167,ENSP00000265052,ENSP00000296526,ENSP00000358513	CNR1,FAAH,GRIA2,MGLL
	hsa04923	Regulation of lipolysis in adipocytes	3	53	0.00053	ENSP00000265052,ENSP00000305372,ENSP00000358301	ADRB1,ADRB2,MGLL
	hsa04022	cGMP-PKG signaling pathway	4	160	0.00062	ENSP00000286628,ENSP00000305372,ENSP00000349467,ENSP00000358301	ADRB1,ADRB2,CALM1,KCNMA1
	hsa00982	Drug metabolism - cytochrome P450	3	66	0.00083	ENSP00000340684,ENSP00000342007,ENSP00000367309	CYP1A2,MAOA,MAOB
	hsa00360	Phenylalanine metabolism	2	17	0.0018	ENSP00000340684,ENSP00000367309	MAOA,MAOB
	hsa04750	Inflammatory mediator regulation of TRP channels	3	92	0.0019	ENSP00000276198,ENSP00000349467,ENSP00000437737	CALM1,HTR2A,HTR2C
	hsa04725	Cholinergic synapse	3	111	0.0031	ENSP00000303211,ENSP00000306490,ENSP00000407546	ACHE,CHRM1,CHRNA7
	hsa04261	Adrenergic signaling in cardiomyocytes	3	139	0.0056	ENSP00000305372,ENSP00000349467,ENSP00000358301	ADRB1,ADRB2,CALM1
	hsa05012	Parkinson's disease	3	142	0.0057	ENSP00000270349,ENSP00000354859,ENSP00000377353	DRD1,DRD2,SLC6A3
	hsa00350	Tyrosine metabolism	2	36	0.0058	ENSP00000340684,ENSP00000367309	MAOA,MAOB
	hsa00260	Glycine, serine and threonine metabolism	2	39	0.0065	ENSP00000340684,ENSP00000367309	MAOA,MAOB
	hsa00620	Pyruvate metabolism	2	39	0.0065	ENSP00000261733,ENSP00000362463	ALDH2,GLO1
	hsa05033	Nicotine addiction	2	40	0.0065	ENSP00000296526,ENSP00000407546	CHRNA7,GRIA2
	hsa01100	Metabolic pathways	7	1250	0.009	ENSP00000261733,ENSP00000265052,ENSP00000340684,ENSP00000342007,ENSP00000353720,ENSP00000358903,ENSP00000367309	ALDH2,CES1,CYP17A1,CYP1A2,MAOA,MAOB,MGLL
	hsa00140	Steroid hormone biosynthesis	2	58	0.0119	ENSP00000342007,ENSP00000358903	CYP17A1,CYP1A2
	hsa00561	Glycerolipid metabolism	2	59	0.0119	ENSP00000261733,ENSP00000265052	ALDH2,MGLL
	hsa04015	Rap1 signaling pathway	3	203	0.0119	ENSP00000349467,ENSP00000354859,ENSP00000358513	CALM1,CNR1,DRD2
	hsa04720	Long-term potentiation	2	64	0.013	ENSP00000296526,ENSP00000349467	CALM1,GRIA2
	hsa05204	Chemical carcinogenesis	2	76	0.0174	ENSP00000342007,ENSP00000407546	CHRNA7,CYP1A2
	hsa04713	Circadian entrainment	2	93	0.0247	ENSP00000296526,ENSP00000349467	CALM1,GRIA2
	hsa04270	Vascular smooth muscle contraction	2	119	0.038	ENSP00000286628,ENSP00000349467	CALM1,KCNMA1
Cluster4	#term ID	term description	observed gene count	background gene count	false discovery rate	matching proteins in your network (IDs)	matching proteins in your network (labels)
	hsa04080	Neuroactive ligand-receptor interaction	5	272	1.01e-06	ENSP00000296526,ENSP00000306490,ENSP00000358513,ENSP00000407546,ENSP00000437737	CHRM1,CHRNA7,CNR1,GRIA2,HTR2A
	hsa04020	Calcium signaling pathway	3	179	0.00073	ENSP00000306490,ENSP00000407546,ENSP00000437737	CHRM1,CHRNA7,HTR2A
	hsa05033	Nicotine addiction	2	40	0.0014	ENSP00000296526,ENSP00000407546	CHRNA7,GRIA2
	hsa04725	Cholinergic synapse	2	111	0.0077	ENSP00000306490,ENSP00000407546	CHRM1,CHRNA7
	hsa04726	Serotonergic synapse	2	112	0.0077	ENSP00000261707,ENSP00000437737	HTR2A,SLC6A4
	hsa04723	Retrograde endocannabinoid signaling	2	148	0.009	ENSP00000296526,ENSP00000358513	CNR1,GRIA2
	hsa04024	cAMP signaling pathway	2	195	0.0132	ENSP00000296526,ENSP00000306490	CHRM1,GRIA2
