# Supplementary material for: Qi Fu Yin ameliorates neuroinflammation through inhibiting RAGE and TLR4/NF-κB pathway in AD model rats
Source: Aging (Albany NY). 2023 Nov 22;15(22):13239–64. doi: 10.18632/aging.205238 (PMC10713403; doi:10.18632/aging.205238)
Supplement: Supplementary Table 5 [file aging-15-205238-s006.xlsx]

## Sheet: Sheet1
Supplementary Table 5. Top 20 Gene Ontology (GO) enrichment analysis of the predicted targets in Qi Fu Yin (QFY) treatment of Alzheimer’s disease (AD). P < 0.05.
Category	Term	Count	%	PValue	Genes	List Total	Pop Hits	Pop Total	Fold Enrichment	Bonferroni	Benjamini	FDR
GOTERM_BP_DIRECT	GO:0044255~cellular lipid metabolic process	4	3.92157	0.00190727	Q13133, P19793, Q07869, P55055	102	41	16792	16.0612	0.961566	0.0425204	3.17027
GOTERM_BP_DIRECT	GO:0051402~neuron apoptotic process	4	3.92157	0.00101075	Q07812, Q00535, P05067, P10415	102	33	16792	19.9548	0.822045	0.0254355	1.69204
GOTERM_BP_DIRECT	GO:0097190~apoptotic signaling pathway	5	4.90196	0.00088	Q14790, Q03181, Q07812, P53355, P42574	102	71	16792	11.5935	0.777346	0.0231976	1.47401
GOTERM_BP_DIRECT	GO:0032868~response to insulin	5	4.90196	0.000707	Q96EB6, P05413, Q04206, O60603, Q07869	102	67	16792	12.2856	0.70085	0.0202466	1.18594
GOTERM_BP_DIRECT	GO:0007268~chemical synaptic transmission	9	8.82353	9.98e-05	P41143, P31645, P28223, P28482, P50406, P23975, Q00535, P42262, P28335	102	240	16792	6.17353	0.156678	0.00395509	0.168318
GOTERM_BP_DIRECT	GO:0006954~inflammatory response	11	10.7843	9.44e-05	Q99685, P35354, Q04206, P48736, P16050, P14174, P19838, P23219, O60603, P78380, P34972	102	379	16792	4.77811	0.148822	0.00382918	0.159168
GOTERM_BP_DIRECT	GO:0006691~leukotriene metabolic process	4	3.92157	9.12e-05	P09917, P33527, P16050, O60603	102	15	16792	43.9007	0.144144	0.00378921	0.153757
GOTERM_BP_DIRECT	GO:0008283~cell proliferation	11	10.7843	7.07e-05	P10275, P49759, Q03181, Q00535, P22303, P14174, P50750, P11229, Q15078, P40763, P10415	102	366	16792	4.94782	0.113698	0.0033471	0.119249
GOTERM_BP_DIRECT	GO:0019372~lipoxygenase pathway	4	3.92157	5.78e-05	P09917, P18054, P35354, P16050	102	13	16792	50.6546	0.0939832	0.00298636	0.0975229
GOTERM_BP_DIRECT	GO:0008203~cholesterol metabolic process	6	5.88235	5.5e-05	P19793, P05112, P27169, Q03181, Q12772, P05067	102	68	16792	14.526	0.0896226	0.00302432	0.0927809
GOTERM_BP_DIRECT	GO:0055114~oxidation-reduction process	14	13.7255	5.41e-05	P09917, P35354, P05093, P35228, P14598, P04035, P05164, P05177, P27338, P29474, P11511, P21397, P16050, P23219	102	592	16792	3.89322	0.0881467	0.00307115	0.091181
GOTERM_BP_DIRECT	GO:0007613~memory	6	5.88235	3.51e-05	P31645, P28223, P35354, P21728, P21554, P36544	102	62	16792	15.9317	0.05821	0.00206589	0.0592706
GOTERM_BP_DIRECT	GO:0006915~apoptotic process	14	13.7255	3.47e-05	P42224, Q14790, Q03181, P14598, P19838, P04150, Q07812, P53355, P28482, P42574, Q16539, O60603, P55211, P10415	102	567	16792	4.06488	0.057527	0.00211376	0.0585544
GOTERM_BP_DIRECT	GO:0019369~arachidonic acid metabolic process	5	4.90196	1.42e-05	P18054, Q99685, P16050, O00519, P47712	102	25	16792	32.9255	0.0238686	0.00100608	0.0238794
GOTERM_BP_DIRECT	GO:0050728~negative regulation of inflammatory response	7	6.86275	7.95e-06	P60568, Q13133, Q03181, P19838, Q07869, P36544, P34972	102	79	16792	14.5872	0.0134711	0.000616	0.0134069
GOTERM_BP_DIRECT	GO:0043525~positive regulation of neuron apoptotic process	6	5.88235	5.72e-06	P05412, Q07812, Q00535, P42574, Q15078, P55211	102	43	16792	22.9713	0.0097175	0.000465	0.00965307
GOTERM_BP_DIRECT	GO:0008284~positive regulation of cell proliferation	14	13.7255	4.33e-06	Q96EB6, P18054, P28223, P60568, P10275, P27487, P17861, P08913, P28482, Q04206, P11229, P40763, P36544, P10415	102	466	16792	4.94589	0.00736605	0.000389	0.00730863
GOTERM_BP_DIRECT	GO:0007568~aging	10	9.80392	6.62e-07	P05164, P05412, P18054, P28223, Q04206, P04035, Q01959, P21554, P55211, P40763	102	165	16792	9.97742	0.00112878	8.69e-05	0.00111651
GOTERM_BP_DIRECT	GO:0043066~negative regulation of apoptotic process	15	14.7059	5.62e-07	Q96EB6, P18054, Q03181, P49841, Q04760, P14174, P19838, P05164, P60568, P05112, P17861, Q04206, P42574, P40763, P10415	102	455	16792	5.42728	0.000959	7.99e-05	0.000948
GOTERM_BP_DIRECT	GO:0042493~response to drug	24	23.5294	3.15e-19	P24385, P42224, P31645, P28223, P35354, P50750, Q01959, P05412, P07900, P05413, P05112, P33527, P27338, P08183, Q9UNQ0, Q04206, P23975, P42574, P14416, P37231, P28335, P21728, P40763, P10415	102	304	16792	12.9969	5.38e-16	5.38e-16	5.32e-16
