# Supplementary material for: Qi Fu Yin ameliorates neuroinflammation through inhibiting RAGE and TLR4/NF-κB pathway in AD model rats
Source: Aging (Albany NY). 2023 Nov 22;15(22):13239–64. doi: 10.18632/aging.205238 (PMC10713403; doi:10.18632/aging.205238)
Supplement: Supplementary Table 6 [file aging-15-205238-s007.xlsx]

## Sheet: Sheet1
Supplementary Table 6. Top 20 pathway enrichment analysis of the predicted targets in Qi Fu Yin (QFY) treatment of Alzheimer’s disease (AD). P < 0.05.
KEGG_A_class	KEGG_B_class	Pathway	out (93)	All (7167)	Pvalue	Qvalue	Pathway ID	Genes	K_IDs
Organismal Systems	Nervous system	Serotonergic synapse	15	110	6.76169e-12	7.43785e-10	ko04726	APP;ALOX15;ALOX5;HTR2A;CASP3;MAOA;MAOB;MAPK1;SLC6A4;ALOX12;HTR2C;PTGS1;HTR6;PTGS2;PLA2G4A	K04520+K00460+K00461+K04157+K02187+K00274+K00274+K04371+K05037+K00458+K04157+K00509+K04162+K11987+K16342
Human Diseases	Endocrine and metabolic diseases	AGE-RAGE signaling pathway in diabetic complications	13	99	3.12025e-10	9.8065e-09	ko04933	RELA;NOS3;CASP3;BCL2;MAPK14;BAX;JUN;MAPK1;STAT1;CCND1;MAPK10;STAT3;NFKB1	K04735+K13242+K02187+K02161+K04441+K02159+K04448+K04371+K11220+K04503+K04440+K04692+K02580
Environmental Information Processing	Signal transduction	cAMP signaling pathway	15	194	2.1862e-08	4.00804e-07	ko04024	GRIA2;RELA;ADRB1;CHRM2;DRD2;JUN;MAPK1;ADRB2;CHRM1;DRD1;CALM1;MAPK10;PPARA;NFKB1;HTR6	K05198+K04735+K04141+K04130+K04145+K04448+K04371+K04142+K04129+K04144+K02183+K04440+K07294+K02580+K04162
Human Diseases	Endocrine and metabolic diseases	Non-alcoholic fatty liver disease (NAFLD)	12	147	3.53747e-07	4.5779e-06	ko04932	RELA;XBP1;CASP8;CASP3;BAX;JUN;GSK3B;RXRA;MAPK10;PPARA;NR1H3;NFKB1	K04735+K09027+K04398+K02187+K02159+K04448+K03083+K08524+K04440+K07294+K08536+K02580
Human Diseases	Endocrine and metabolic diseases	Insulin resistance	10	105	8.68237e-07	8.68237e-06	ko04931	RELA;NOS3;PTPN1;GSK3B;NR1H2;MAPK10;PPARA;NR1H3;STAT3;NFKB1	K04735+K13242+K05696+K03083+K08535+K04440+K07294+K08536+K04692+K02580
Environmental Information Processing	Signaling molecules and interaction	Neuroactive ligand-receptor interaction	15	274	1.98087e-06	1.71128e-05	ko04080	GRIA2;ADRB1;CHRM2;CNR2;NR3C1;DRD2;HTR2A;ADRB2;CHRM1;DRD1;OPRD1;CNR1;ADRA2A;HTR2C;HTR6	K05198+K04141+K04130+K04278+K05771+K04145+K04157+K04142+K04129+K04144+K04213+K04277+K04138+K04157+K04162
Organismal Systems	Nervous system	Neurotrophin signaling pathway	10	117	2.36296e-06	1.79259e-05	ko04722	RELA;BCL2;MAPK14;BAX;JUN;MAPK1;GSK3B;CALM1;MAPK10;NFKB1	K04735+K02161+K04441+K02159+K04448+K04371+K03083+K02183+K04440+K02580
Cellular Processes	Cell growth and death	Apoptosis - multiple species	6	33	3.3892e-06	2.40524e-05	ko04215	CASP8;CASP3;BCL2;BAX;MAPK10;CASP9	K04398+K02187+K02161+K02159+K04440+K04399
Organismal Systems	Nervous system	Dopaminergic synapse	10	129	5.73412e-06	3.71031e-05	ko04728	GRIA2;DRD2;MAPK14;MAOA;MAOB;GSK3B;SLC6A3;DRD1;CALM1;MAPK10	K05198+K04145+K04441+K00274+K00274+K03083+K05036+K04144+K02183+K04440
Organismal Systems	Immune system	Toll-like receptor signaling pathway	9	102	5.99566e-06	3.7687e-05	ko04620	TLR2;RELA;CASP8;MAPK14;JUN;MAPK1;STAT1;MAPK10;NFKB1	K10159+K04735+K04398+K04441+K04448+K04371+K11220+K04440+K02580
Environmental Information Processing	Signal transduction	PI3K-Akt signaling pathway	16	345	7.52944e-06	4.53055e-05	ko04151	IL2;TLR2;RELA;NOS3;IL4;CHRM2;BCL2;MAPK1;GSK3B;CCND1;RXRA;CHRM1;HSP90AA1;CASP9;NFKB1;PIK3CG	K05429+K10159+K04735+K13242+K05430+K04130+K02161+K04371+K03083+K04503+K08524+K04129+K04079+K04399+K02580+K21289
Environmental Information Processing	Signal transduction	TNF signaling pathway	9	105	7.61956e-06	4.53055e-05	ko04668	RELA;CASP8;CASP3;MAPK14;JUN;MAPK1;MAPK10;NFKB1;PTGS2	K04735+K04398+K02187+K04441+K04448+K04371+K04440+K02580+K11987
Cellular Processes	Cell growth and death	Apoptosis	10	135	8.61527e-06	4.98779e-05	ko04210	RELA;CASP8;CASP3;BCL2;BAX;JUN;MAPK1;MAPK10;CASP9;NFKB1	K04735+K04398+K02187+K02161+K02159+K04448+K04371+K04440+K04399+K02580
Human Diseases	Neurodegenerative diseases	Alzheimer disease	11	171	1.15738e-05	6.36557e-05	ko05010	APP;MAPT;CASP8;CDK5;CASP3;MAPK1;GSK3B;BACE1;CALM1;CDK5R1;CASP9	K04520+K04380+K04398+K02090+K02187+K04371+K03083+K04521+K02183+K11716+K04399
Organismal Systems	Endocrine system	PPAR signaling pathway	7	72	3.6589e-05	0.0001677	ko03320	PPARG;PPARD;OLR1;RXRA;FABP3;PPARA;NR1H3	K08530+K04504+K08763+K08524+K08752+K07294+K08536
Organismal Systems	Nervous system	Cholinergic synapse	6	108	0.00268642	0.00671606	ko04725	CHRM2;BCL2;MAPK1;CHRM1;ACHE;PIK3CG	K04130+K02161+K04371+K04129+K01049+K21289
Environmental Information Processing	Signal transduction	NF-kappa B signaling pathway	5	93	0.00699383	0.0149383	ko04064	RELA;PLAU;BCL2;NFKB1;PTGS2	K04735+K01348+K02161+K02580+K11987
Environmental Information Processing	Signal transduction	MAPK signaling pathway	9	286	0.0115567	0.0231134	ko04010	RELA;MAPT;CASP3;MAPK14;JUN;MAPK1;MAPK10;NFKB1;PLA2G4A	K04735+K04380+K02187+K04441+K04448+K04371+K04440+K02580+K16342
Environmental Information Processing	Signal transduction	Jak-STAT signaling pathway	6	162	0.0184178	0.0352341	ko04630	IL2;IL4;BCL2;STAT1;CCND1;STAT3	K05429+K05430+K02161+K11220+K04503+K04692
Organismal Systems	Endocrine system	Insulin signaling pathway	5	137	0.0323189	0.0592513	ko04910	PTPN1;MAPK1;GSK3B;CALM1;MAPK10	K05696+K04371+K03083+K02183+K04440
